# Supplementary material for: Targeted therapies for congenital myasthenic syndromes: systematic review and steps towards a treatabolome
Source: Emerg Top Life Sci. 2019 Jan 28;3(1):19–37. doi: 10.1042/ETLS20180100 (PMC6436731; doi:10.1042/ETLS20180100)
Supplement: Supplementary File S1 [file ETLS-3-19-s1.pdf]

## Sheet: Case reports with variant data
No.	PMID	Year	Authors	Title	Journal	Abstract	Type of study	Number of patients	Gene	Subtype descriptive name	Subtype OMIM code	Variants	Inheritance and zygosity	Drug 1	Effect	Drug 2	Effect	Drug 3	Effect	Drug 4	Effect
1	29783273	2018	Arican, P., Gencpinar, P., Cavusoglu, D. and Olgac Dundar, N.	Clinical and Genetic Features of Congenital Myasthenic Syndromes due to CHAT Mutations: Case Report and Literature Review	Neuropediatrics	Congenital myasthenic syndromes (CMS) are neuromuscular transmission disorders caused by mutations in genes encoding neuromuscular junction proteins. CMS due to choline acetyltransferase (CHAT) gene is characterized by episodic apnea. We report a case of a 12-month-old female patient presented with recurrent episodic apnea carrying a mutation in CHAT gene, p.I336T. Furthermore, we describe the ge…	Case report	1	CHAT	Congenital myasthenic syndrome due to endplate choline acetyltransferase deficiency caused by pathogenic variants in CHAT	254210: Myasthenic syndrome, congenital, 6, presynaptic; CMS6	p.I336T	AR/homozygous	Pyridostigmine	Positive	N/A	Positive	N/A	N/A	N/A	N/A
2	30257713	2018	Astrea, G., Romano, A., Angelini, C., Antozzi, C. G., Barresi, R., Battini, R., Battisti, C., Bertini, E., Bruno, C., Cassandrini, D., Fanin, M., Fattori, F., Fiorillo, C., Guerrini, R., Maggi, L., Mercuri, E., Morani, F., Mora, M., Moro, F., Pezzini, I., Picillo, E., Pinelli, M., Politano, L., Rubegni, A., Sanseverino, W., Savarese, M., Striano, P., Torella, A., Trevisan, C. P., Trovato, R., Zar…	Broad phenotypic spectrum and genotype-phenotype correlations in GMPPB-related dystroglycanopathies: an Italian cross-sectional study	Orphanet J Rare Dis	BACKGROUND: Dystroglycanopathy (alpha-DG) is a relatively common, clinically and genetically heterogeneous category of congenital forms of muscular dystrophy (CMD) and limb-girdle muscular dystrophy (LGMD) associated with hypoglycosylated alpha-dystroglycan. To date, mutations in at least 19 genes have been associated with alpha-DG. One of them, GMPPB, encoding the guanosine-diphosphate-mannose (…	Case series of which 1 is relevant	1	GMPPB	Congenital myasthenic syndrome due to a defect of glycosylation caused by pathogenic variants in GMPPB	N/A	p.R243W, p.P32L	AR/compound heterozygous	Pyridostigmine	Positive	N/A	N/A	N/A	N/A	N/A	N/A
3	29363764	2018	Beeson, D., Cossins, J., Rodriguez-Cruz, P., Maxwell, S., Liu, W. W. and Palace, J.	Myasthenic syndromes due to defects in COL13A1 and in the N-linked glycosylation pathway	Ann N Y Acad Sci	The congenital myasthenic syndromes (CMS) are hereditary disorders of neuromuscular transmission. The number of cases recognized, at around 1:100,000 in the United Kingdom, is increasing with improved diagnosis. The advent of next-generation sequencing has facilitated the discovery of many genes that harbor CMS-associated mutations. An emerging group of CMS, characterized by a limb-girdle pattern…	Case report	1	COL13A1	Congenital myasthenic syndrome due to collagen 13 defects caused by pathogenic variants in COL13A1	616720: Myasthenic syndrome, congenital, 19; CMS19	c.1171delG (p.Gly175Valfs*20)	AR/homozygous	Salbutamol	Positive	3,4-diaminopyridine	Positive	Pyridostigmine	No response	N/A	N/A
4	29356258	2018	Bogdanova-Mihaylova, P., Murphy, R. P. J., Alexander, M. D., McHugh, J. C., Foley, A. R., Brett, F. and Murphy, S. M.	Congenital myasthenic syndrome due to DPAGT1 mutations mimicking congenital myopathy in an Irish family	Eur J Neurol		Familial case report	2	DPAGT1	Congenital myasthenic syndrome due to a defect of glycosylation caused by pathogenic variants in DPAGT1	614750: Myasthenic syndrome, congenital, 13; CMS13	c.135_136delCC p.(Leu46 fs), c.367C>T p.(Arg123Cys)	AR/compound heterozygous	Pyridostigmine	Positive	Salbutamol	Positive	N/A	N/A	N/A	N/A
5	29395675	2018	Durmus, H., Shen, X. M., Serdaroglu-Oflazer, P., Kara, B., Parman-Gulsen, Y., Ozdemir, C., Brengman, J., Deymeer, F. and Engel, A. G.	Congenital myasthenic syndromes in Turkey: Clinical clues and prognosis with long term follow-up	Neuromuscul Disord	Congenital myasthenic syndromes (CMS) are a group of hereditary disorders affecting the neuromuscular junction. Here, we present clinical, electrophysiological and genetic findings of 69 patients from 51 unrelated kinships from Turkey. Genetic tests of 60 patients were performed at Mayo Clinic. Median follow-up time was 9.8 years (range 1-22 years). The most common CMS was primary acetylcholine r…	Case series	45	CHRNE	Congenital myasthenic syndrome due to primary acetylcholine receptor deficiency caused by pathogenic variants in CHRNE	608931: Myasthenic syndrome, congenital, 4c, associated with acetylcholine receptor deficiency; CMS4c	NM_000080 NP_000071 c.1219 + 2T > G (c.1159 + 2T > G) c.1327delG p.E443Kfs*64 (c.1267delG) (p.E423Kfs*64) c.452_454delAGG p.E151del (c.392_394delAGG) (p.E131del) c.442T > A p.C148S (c.382T > A) (p.C128S) c.1367_1369delACA p.N456del (c.1307_1309delACA) (p.N436del) c.778C > A p.L260I (c.718C > A) (p.L240I) c.1192C > T p.Q398X (c.1132C > T) (p.Q378X) c.601 + 1G > T (c.541 + 1G > T) p.E44Gfs*3 c.130i…	AR homozygous and compound heterozygous	Pyridostigmine	Positive	N/A	N/A	N/A	N/A	N/A	N/A
								1	CHRNB1	Congenital myasthenic syndrome due to primary acetylcholine receptor deficiency caused by pathogenic variants in CHRNB1	616314: Myasthenic syndrome, congenital, 2c, associated with acetylcholine receptor deficiency; CMS2c	NM_000747 NP_000738 c.727C > T p.R243C (c.668C > T) (p.R220C)	AR homozygous	Pyridostigmine	Positive	N/A	N/A	N/A	N/A	N/A	N/A
								5	COLQ	Congenital myasthenic syndrome due to endplate acetylcholinesterase deficiency caused by pathogenic variants in COLQ	603034: Myasthenic syndrome, congenital, 5; CMS5	NM_005677 NP_005668 c.444G > A p.W148X c.1082delC p.P361Lfs*65		Pyridostigmine	Negative	Ephedrine	Positive	Salbutamol	Positive	N/A	N/A
								6	GFPT1	Congenital myasthenic syndrome due to a defect of glycosylation caused by pathogenic variants in GFPT1	610542: Myasthenic syndrome, congenital, 12; CMS12	NM_002056 NP_002047 c.2002G > A p.V668I c.821T > C* p.I274T c.686-2A > G c.331C > T p.R111C		Pyridostigmine	Positive	3,4-diaminopyridine	Positive	Salbutamol	Positive	N/A	N/A
								3	DOK7	Congenital myasthenic syndrome due to defects in docking protein 7 caused by pathogenic variants in DOK7	254300: Myasthenic syndrome, congenital, 10; CMS10	NM_173600 NP_775931 c.922delG p.E309Kfs*147 c.1124_1127dup p.A378Sfs*30 c.496G > A p.G166R		Pyridostigmine	No response	Salbutamol	Positive	N/A	N/A	N/A	N/A
								2	CHRNA1	Slow-channel congenital myasthenic syndrome due to an acetylcholine receptor defect caused by a pathogenic variant in CHRNA1	601462: Myasthenic syndrome, congenital, 1a, slow-channel; CMS1a	NM_000079 NP_000070 c.1314C > G p.C438W (c.1254C > G) (p.C418W) c.711C > A p.N237K (c.651C > A) (p.N217K)	AD heterozygous	Pyridostigmine	Equivocal	Fluoxetine	Positive	Salbutamol	Positive	N/A	N/A
								1	CHRNE	Slow-channel congenital myasthenic syndrome due to an acetylcholine receptor defect caused by a pathogenic variant in CHRNE	605809: Myasthenic syndrome, congenital, 4a, slow-channel; CMS4a	NM_000080 NP_000071 c.865C > A p.L289F (c.805C > A) (p.L269F)	AD heterozygous	Pyridostigmine	Equivocal	Fluoxetine	Positive	Salbutamol	Positive	N/A	N/A
								3	CHRNE	Fast-channel congenital myasthenic syndrome due to an acetylcholine receptor defect caused by pathogenic variants in CHRNE	616324: Myasthenic syndrome, congenital, 4b, fast-channel; CMS4b	NM_000080 NP_000071 c.610G > A p.E204K (c.550G > A) (p.E184K) c.712C > T p.R238W (c.652C > T) (p.R218W) c.965G > A p.C322Y (c.905G > A) (p.C302Y)	AR homozygous and compound heterozygous	Pyridostigmine	Positive	Salbutamol	Positive	N/A	N/A	N/A	N/A
								1	CHAT	Congenital myasthenic syndrome due to endplate choline acetyltransferase deficiency caused by pathogenic variants in CHAT	254210: Myasthenic syndrome, congenital, 6, presynaptic; CMS6	NM_020549 NP_065574 c.1007T > C p.I336T	AR homozygous	Pyridostigmine	Partial	Salbutamol	Partial	N/A	N/A	N/A	N/A
								2	DES	N/A	N/A			Salbutamol	Positive	N/A	N/A	N/A	N/A	N/A	N/A
6	29383513	2018	Estephan, E. P., Sobreira, Cfdr, Dos Santos, A. C. J., Tomaselli, P. J., Marques, W., Jr., Ortega, R. P. M., Costa, M. C. M., da Silva, A. M. S., Mendonca, R. H., Caldas, V. M., Zambon, A. A., Abath Neto, O., Marchiori, P. E., Heise, C. O., Reed, U. C., Azuma, Y., Topf, A., Lochmuller, H. and Zanoteli, E.	A common CHRNE mutation in Brazilian patients with congenital myasthenic syndrome	J Neurol	The most common causes of congenital myasthenic syndromes (CMS) are CHRNE mutations, and some pathogenic allelic variants in this gene are especially frequent in certain ethnic groups. In the southern region of Brazil, a study found the c.130dupG CHRNE mutation in up to 33% of families with CMS. Here, we aimed to verify the frequency of this mutation among individuals with CMS in a larger cohort …	Case series	84	CHRNE	Congenital myasthenic syndrome due to primary acetylcholine receptor deficiency caused by pathogenic variants in CHRNE	608931: Myasthenic syndrome, congenital, 4c, associated with acetylcholine receptor deficiency; CMS4c	c.130dupG/c.130dupG c.130dupG/c.803-2A > G c.130dupG/c.858_859dup c.130dupG/c.422T > A	AR homozygous and compound heterozygous	Pyridostigmine	Positive	Ephedrine	Positive	N/A	N/A	N/A	N/A
7	30266223	2018	Estephan, E. P., Zambon, A. A., Marchiori, P. E., da Silva, A. M. S., Caldas, V. M., Moreno, C. A. M., Reed, U. C., Horvath, R., Topf, A., Lochmuller, H. and Zanoteli, E.	Clinical variability of early-onset congenital myasthenic syndrome due to biallelic RAPSN mutations in Brazil	Neuromuscul Disord	Mutations in RAPSN are an important cause of congenital myasthenic syndrome (CMS), leading to endplate acetylcholine receptor deficiency. We present three RAPSN early-onset CMS patients (from a Brazilian cohort of 61 CMS patients). Patient 1 and patient 2 harbor the mutation p.N88K in homozygosity, while patient 3 harbors p.N88K in compound heterozygosity with another pathogenic variant (p.V165M;…	Case series	3	RAPSN	Congenital myasthenic syndrome due to endplate rapsyn deficiency caused by pathogenic variants in RAPSN	616326: Myasthenic syndrome, congenital, 11, associated with acetylcholine receptor deficiency; CMS11	NM_005055.3 p.N88K (c.264C > A) p.V165M (c.493G > A)		Pyridostigmine	Positive	Ephedrine	Positive	N/A	N/A	N/A	N/A
8	29311015	2018	Feresiadou, A., Casar-Borota, O., Dragomir, A., Oldfors, C. H., Stalberg, E. and Oldfors, A.	Tubular aggregates in congenital myasthenic syndrome	Neuromuscul Disord		Case report	1	DPAGT1	Congenital myasthenic syndrome due to a defect of glycosylation caused by pathogenic variants in DPAGT1	614750: Myasthenic syndrome, congenital, 13; CMS13	c.613A>C (p.Ile205Leu) + c.1154T>G (p.Leu385Arg)	AR compound heterozygous	Pyridostigmine	Positive	Salbutamol	Positive	N/A	N/A	N/A	N/A
9	30177536	2018	Irumudomon, O. and Ghosh, P. S.	Clinical Reasoning: A child with arthrogryposis: Congenital myasthenic syndrome-CHRNA1 mutation	Neurology		Case report	1	CHRNA1	Congenital myasthenic syndrome due to primary acetylcholine receptor deficiency caused by pathogenic variants in CHRNA1	N/A	c.257G > A, p.R86H	AR homozygous	Pyridostigmine	Positive	N/A	N/A	N/A	N/A	N/A	N/A
10	30028532	2018	Kumar, A., Asghar, S., Kavanagh, R. and Wicklund, M. P.	Unique presentation of rapidly fluctuating symptoms in a child with congenital myasthenic syndrome due to RAPSN mutation	Muscle Nerve		Case report	1	RAPSN	Congenital myasthenic syndrome due to endplate rapsyn deficiency caused by pathogenic variants in RAPSN	616326: Myasthenic syndrome, congenital, 11, associated with acetylcholine receptor deficiency; CMS11	c.-264C>A (p.Asn88Lys),	AR homozygous	Pyridostigmine	Positive	Salbutamol	Positive	N/A	N/A	N/A	N/A
11	29913539	2018	Laugwitz, L., Redler, S., Buchert, R., Sturm, M., Zeile, I., Schara, U., Wieczorek, D., Haack, T. and Distelmaier, F.	Isolated PREPL deficiency associated with congenital myasthenic syndrome-22	Klin Padiatr		Case report	1	PREPL	Congenital myasthenic syndrome due to pathogenic variants in PREPL that predict reduced filling of synaptic vesicles with ACh	616224: Myasthenic syndrome, congenital, 22; CMS22	c.1529 + 1 G > A (p.(?)) + c.1784delinsAA (p.Thr595Lysfs * 19)	AR compound heterozygous	Pyridostigmine	No response	N/A	N/A	N/A	N/A	N/A	N/A
12	29189923	2018	McMacken, G., Whittaker, R. G., Evangelista, T., Abicht, A., Dusl, M. and Lochmuller, H.	Congenital myasthenic syndrome with episodic apnoea: clinical, neurophysiological and genetic features in the long-term follow-up of 19 patients	J Neurol	BACKGROUND: Congenital myasthenic syndrome with episodic apnoea (CMS-EA) is a rare but potentially treatable cause of apparent life-threatening events in infancy. The underlying mechanisms for sudden and recurrent episodes of respiratory arrest in these patients are unclear. Whilst CMS-EA is most commonly caused by mutations in CHAT, the list of associated genotypes is expanding. METHODS: We revi…	Case series	4	CHAT	Congenital myasthenic syndrome due to endplate choline acetyltransferase deficiency caused by pathogenic variants in CHAT	254210: Myasthenic syndrome, congenital, 6, presynaptic; CMS6	2081C > G (S694C) ex 18 + 1061C > T (T354M) ex 10 1408C > T (R470X) ex 11 + 1730T > G (F580C) ex 13 1642C > T (R548X) ex 15 + 1669G > A (A557T) ex 15	AR compound heterozygous	Acetylcholinesterase inhibitors	Positive	3,4-diaminopyridine	Positive	Salbutamol	Positive	N/A	N/A
								2	SLC5A7	Congenital myasthenic syndrome due to a choline transporter defect caused by pathogenic variants in SLC5A7	617143: Myasthenic syndrome, congenital, 20, presynaptic; CMS20	331T > C (Y111H) + 1252T > G (F418 V) 524A > G (Y175C) + c.1030G > C (V344L)	AR compound heterozygous	Acetylcholinesterase inhibitors	Equivocal	Salbutamol	No response	N/A	N/A	N/A	N/A
								1	RAPSN	Congenital myasthenic syndrome due to endplate rapsyn deficiency caused by pathogenic variants in RAPSN	616326: Myasthenic syndrome, congenital, 11, associated with acetylcholine receptor deficiency; CMS11	264C > A (N88K) ex 2 + 1169G > A (C390Y) ex 8	AR compound heterozygous	Acetylcholinesterase inhibitors	Positive	N/A	N/A	N/A	N/A	N/A	N/A
								1	CHRNE	Congenital myasthenic syndrome due to primary acetylcholine receptor deficiency caused by pathogenic variants in CHRNE	608931: Myasthenic syndrome, congenital, 4c, associated with acetylcholine receptor deficiency; CMS4c	43T > C (Y15H) ex 2 + 113C > A (T38 K) ex 2	AR compound heterozygous	Acetylcholinesterase inhibitors	Positive	Salbutamol	Positive	N/A	N/A	N/A	N/A
								11	Unknown	N/A	N/A	N/A	N/A			N/A	N/A	N/A	N/A	N/A	N/A
13	29704306	2018	Owen, D., Topf, A., Preethish-Kumar, V., Lorenzoni, P. J., Vroling, B., Scola, R. H., Dias-Tosta, E., Geraldo, A., Polavarapu, K., Nashi, S., Cox, D., Evangelista, T., Dawson, J., Thompson, R., Senderek, J., Laurie, S., Beltran, S., Gut, M., Gut, I., Nalini, A. and Lochmuller, H.	Recessive variants of MuSK are associated with late onset CMS and predominant limb girdle weakness	Am J Med Genet A	Congenital myasthenic syndrome (CMS) is a heterogeneous disorder that causes fatigable muscle weakness. CMS has been associated with variants in the MuSK gene and, to date, 16 patients have been reported. MuSK-CMS patients present a different phenotypic pattern of limb girdle weakness. Here, we describe four additional patients and discuss the phenotypic and clinical relationship with those previ…	Case series	4	MUSK	Congenital myasthenic syndrome due to defects in MuSK caused by pathogenic variants in MUSK	616325: Myasthenic syndrome, congenital, 9, associated with acetylcholine receptor deficiency; CMS9	(c.1742T>A; p.I581N) (c.1634T>C; p.L545P) + (c.496C>T; p.R166*) (c.308A>G; p.N103S) (c.2180C>T p.A727V) + (2365G>A p.V790M)	AR homozygous and compound heterozygous	Pyridostigmine	No response	Salbutamol	Positive	Fluoxetine		N/A	N/A
14	30172469	2018	Pardal-Fernandez, J. M., Carrascosa-Romero, M. C., Alvarez, S., Medina-Monzon, M. C., Caamano, M. B. and de Cabo, C.	A new severe mutation in the SLC5A7 gene related to congenital myasthenic syndrome type 20	Neuromuscul Disord	Congenital myasthenic syndromes are a group of genetically determined rare diseases resulting from ultrastructural alterations in synaptic proteins. Up to 32 genes are known to be involved in those syndromes and many mutations have been reported, of which less than 8% affect the presynaptic complex. One of these syndromes is caused by the impairment of the presynaptic sodium-dependent high-affini…	Case report	1	SLC5A7	Congenital myasthenic syndrome due to a choline transporter defect caused by pathogenic variants in SLC5A7	617143: Myasthenic syndrome, congenital, 20, presynaptic; CMS20	NM_021815.2 c.929C > T, p.(Pro310Leu) + c.1459T > C, p.(Ser487Pro)	AR compound heterozygous	Pyridostigmine	Equivocal	N/A	N/A	N/A	N/A	N/A	N/A
15	29395672	2018	Santos, M., Cruz, S., Peres, J., Santos, L., Tavares, P., Basto, J. P., Salgado, V. and Valverde, A. H.	DOK7 myasthenic syndrome with subacute adult onset during pregnancy and partial response to fluoxetine	Neuromuscul Disord	DOK7 congenital myasthenic syndrome (DOK7-CMS) generally presents early in life and is treated with salbutamol or ephedrine. This report describes an atypical case of a 39-year-old woman who presented with proximal upper limb weakness in the third trimester of pregnancy and was initially diagnosed with seronegative myasthenia gravis. Dramatic clinical worsening under pyridostigmine and further in…	Case report	1	DOK7	Congenital myasthenic syndrome due to defects in docking protein 7 caused by pathogenic variants in DOK7	254300: Myasthenic syndrome, congenital, 10; CMS10	NM_173660.4 c.1124_1127dup (p.Ala378Serfs*30)	AR homozygous	Pyridostigmine	Negative	Fluoxetine	Positive	Salbutamol	Positive	N/A	N/A
16	29130637	2018	Schwartz, M., Sternberg, D., Whalen, S., Afenjar, A., Isapof, A., Chabrol, B., Portnoi, M. F., Heide, S., Keren, B., Chantot-Bastaraud, S. and Siffroi, J. P.	How chromosomal deletions can unmask recessive mutations? Deletions in 10q11.2 associated with CHAT or SLC18A3 mutations lead to congenital myasthenic syndrome	Am J Med Genet A	A congenital myasthenia was suspected in two unrelated children with very similar phenotypes including several episodes of severe dyspnea. Both children had a 10q11.2 deletion revealed by Single Nucleotide Polymorphisms array or by Next Generation Sequencing analysis. The deletion was inherited from the healthy mother in the first case. These deletions unmasked a recessive mutation at the same lo…	Case report	1	CHAT	Congenital myasthenic syndrome due to endplate choline acetyltransferase deficiency caused by pathogenic variants in CHAT	254210: Myasthenic syndrome, congenital, 6, presynaptic; CMS6	Deletion of [(arr [hg19] 10q11.22q11.23 (46.283.686-51.832.220)×1)] in compound heterozygosity with [g.50877553G>A NM_020549.4(CHAT):c.1383- 1G>A)]	AR compound heterozygous	Pyridostigmine	Positive	N/A	N/A	N/A	N/A	N/A	N/A
								1	SLC18A3	Congenital myasthenic syndrome due to a vesicular acetylcholine transporter defect caused by pathogenic variants in SLC18A3	617239: Myasthenic syndrome, congenital, 21, presynaptic; CMS21	Deletion of [(arr [hg19] 10q11.22q11.23 (46.283.686-51.832.220)×1)] in compound heterozygosity with [NM_003055.2 (SLC18A3) c.154G>T (p.Val52Phe)]	AR compound heterozygous	Pyridostigmine	Equivocal	N/A	N/A	N/A	N/A	N/A	N/A
17	30124556	2018	Selvam, P., Arunachal, G., Danda, S., Chapla, A., Sivadasan, A., Alexander, M., Thomas, M. M. and Thomas, N. J.	Congenital Myasthenic Syndrome: Spectrum of Mutations in an Indian Cohort	J Clin Neuromuscul Dis	OBJECTIVES: To investigate the mutational spectrum and genotype-phenotype correlation in Indian patients with congenital myasthenic syndrome (CMS), using next-generation sequencing of 5 genes. METHODS: CHRNE, COLQ, DOK7, RAPSN, and GFPT1 were sequenced in 25 affected patients. RESULTS: We found clinically significant variants in 18 patients, of which variants in CHRNE were the most common, and 9 …	Case series	9	CHRNE	Congenital myasthenic syndrome due to primary acetylcholine receptor deficiency caused by pathogenic variants in CHRNE	608931: Myasthenic syndrome, congenital, 4c, associated with acetylcholine receptor deficiency; CMS4c	L98P/L98P c.1216_1219 +19del/c.1327-1del or E443ter c.803-5delAGG/c.803-5delAAG c.1327-1del or E443ter/c.1327-1del or E443ter T179P/T179P c.46+2delT/c.46+2delT R84ter/R84ter	AR homozygous and compound heterozygous	Pyridostigmine	Positive	N/A	N/A	N/A	N/A	N/A	N/A
								5	COLQ	Congenital myasthenic syndrome due to endplate acetylcholinesterase deficiency caused by pathogenic variants in COLQ	603034: Myasthenic syndrome, congenital, 5; CMS5	R402C/R410W R410W/R410W D395N/G283ter	AR homozygous and compound heterozygous	Pyridostigmine	No response	Salbutamol	Positive	N/A	N/A	N/A	N/A
								3	GFPT1	Congenital myasthenic syndrome due to a defect of glycosylation caused by pathogenic variants in GFPT1	610542: Myasthenic syndrome, congenital, 12; CMS12	N53S/N53S L89P/c.540A.G, p.Q180Q R474Q/R474R	AR homozygous and compound heterozygous	Pyridostigmine	Positive	N/A	N/A	N/A	N/A	N/A	N/A
								1	RAPSN	Congenital myasthenic syndrome due to endplate rapsyn deficiency caused by pathogenic variants in RAPSN	616326: Myasthenic syndrome, congenital, 11, associated with acetylcholine receptor deficiency; CMS11	R91L/N88K	AR compound heterozygous	Pyridostigmine	Positive	N/A	N/A	N/A	N/A	N/A	N/A
								7	Unknown	N/A	N/A	N/A	N/A			N/A	N/A	N/A	N/A	N/A	N/A
18	29367459	2018	Shen, X. M., Brengman, J. M., Shen, S., Durmus, H., Preethish-Kumar, V., Yuceyar, N., Vengalil, S., Nalini, A., Deymeer, F., Sine, S. M. and Engel, A. G.	Mutations causing congenital myasthenia reveal principal coupling pathway in the acetylcholine receptor epsilon-subunit	JCI Insight	We identify 2 homozygous mutations in the epsilon-subunit of the muscle acetylcholine receptor (AChR) in 3 patients with severe congenital myasthenia: epsilonR218W in the pre-M1 region in 2 patients and epsilonE184K in the beta8-beta9 linker in 1 patient. Arg218 is conserved in all eukaryotic members of the Cys-loop receptor superfamily, while Glu184 is conserved in the alpha-, delta-, and epsilo…	Case series	3	CHRNE	Fast-channel congenital myasthenic syndrome due to an acetylcholine receptor defect caused by pathogenic variants in CHRNE	616324: Myasthenic syndrome, congenital, 4b, fast-channel; CMS4b	NP_000071.1/NM_000080.3 c.712C>T/p.εR218W c.610G>A/p.εE184K	AR homozygous	Pyridostigmine	Positive	Salbutamol	Positive	Fluoxetine	Negative	N/A	N/A
19	29702980	2018	Yang, K., Cheng, H., Yuan, F., Meng, L., Yin, R., Zhang, Y., Wang, S., Wang, C., Lu, Y., Xi, J., Lu, Q. and Chen, Y.	CHRNE compound heterozygous mutations in congenital myasthenic syndrome: A case report	Medicine (Baltimore)	RATIONALE: Congenital myasthenic syndrome (CMSs) are a group of rare genetic disorders of the neurological junction, which can result in structural or functional weakness. Here, we characterized a case of CMS in order to clarify the diagnosis and expand the understanding of it. The molecular diagnosis had implications for choice of treatment and genetic counseling. PATIENT CONCERNS: A 3-year-old …	Case report	1	CHRNE	Congenital myasthenic syndrome due to primary acetylcholine receptor deficiency caused by pathogenic variants in CHRNE	608931: Myasthenic syndrome, congenital, 4c, associated with acetylcholine receptor deficiency; CMS4c	NM_000080.3 c.442T>A (p.C148S) + c.295C>T (p.R99X)	AR compound heterozygous	Pyridostigmine	Positive	Prednisone	Positive	N/A	N/A	N/A	N/A
20	27748205	2017	Abath Neto, O., Heise, C. O., Moreno, C. A., Estephan, E. P., Mesrob, L., Lechner, D., Boland, A., Deleuze, J. F., Oliveira, A. S., Reed, U. C., Biancalana, V., Laporte, J. and Zanoteli, E.	Nonlethal CHRNA1-Related Congenital Myasthenic Syndrome with a Homozygous Null Mutation	Can J Neurol Sci		Case report	1	CHRNA1	Congenital myasthenic syndrome due to primary acetylcholine receptor deficiency caused by pathogenic variants in CHRNA1	N/A	NM_001039523 c.1396G>A (p.Gly466Arg)	AR homozygous	Pyridostigmine	Positive	N/A	N/A	N/A	N/A	N/A	N/A
21	28744372	2017	Al-Muhaizea, M. A. and Al-Mobarak, S. B.	COLQ-mutant Congenital Myasthenic Syndrome with Microcephaly: A Unique Case with Literature Review	Transl Neurosci	Congenital Myasthenic Syndrome (CMS) is a group of inherited neuromuscular junction disorders caused by defects in several genes. Clinical features include delayed motor milestones, recurrent respiratory illnesses and variable fatigable weakness. The central nervous system involvement is typically not part of the CMS. We report here a Saudi girl with genetically proven Collagen Like Tail Subunit …	Case report	1	COLQ	Congenital myasthenic syndrome due to endplate acetylcholinesterase deficiency caused by pathogenic variants in COLQ	603034: Myasthenic syndrome, congenital, 5; CMS5	N/A	AR homozygous	Salbutamol	Positive	N/A	N/A	N/A	N/A	N/A	N/A
22	28690392	2017	Ardissone, A., Moroni, I., Bernasconi, P. and Brugnoni, R.	Congenital myasthenic syndrome: phenotypic variability in patients harbouring p.T159P mutation in CHRNE gene	Acta Myol	Congenital myasthenic syndromes (CMS) are rare and heterogeneous genetic diseases characterized by compromised neuromuscular transmission and clinical features of fatigable weakness; age at onset, presenting symptoms, distribution of weakness, and response to treatment differ depending on the underlying molecular defect. Mutations in one of the multiple genes, encoding proteins expressed at the n…	Case series	4	CHRNE	Congenital myasthenic syndrome due to primary acetylcholine receptor deficiency caused by pathogenic variants in CHRNE	608931: Myasthenic syndrome, congenital, 4c, associated with acetylcholine receptor deficiency; CMS4c	c.475A>C (p.T159P) c.704C>T (p.S235L)	AR homozygous and compound heterozygous	Salbutamol	Positive	Pyridostigmine	Equivocal	N/A	N/A	N/A	N/A
23	28508085	2017	Azuma, Y., Topf, A., Evangelista, T., Lorenzoni, P. J., Roos, A., Viana, P., Inagaki, H., Kurahashi, H. and Lochmuller, H.	Intragenic DOK7 deletion detected by whole-genome sequencing in congenital myasthenic syndromes	Neurol Genet	OBJECTIVE: To identify the genetic cause in a patient affected by ptosis and exercise-induced muscle weakness and diagnosed with congenital myasthenic syndromes (CMS) using whole-genome sequencing (WGS). METHODS: Candidate gene screening and WGS analysis were performed in the case. Allele-specific PCR was subsequently performed to confirm the copy number variation (CNV) that was suspected from th…	Case report	1	DOK7	Congenital myasthenic syndrome due to defects in docking protein 7 caused by pathogenic variants in DOK7	254300: Myasthenic syndrome, congenital, 10; CMS10	c.1124_1127dup + 6,261 bp deletion	AR compound heterozygous	Salbutamol	Positive	Pyridostigmine	No response	N/A	N/A	N/A	N/A
24	28712002	2017	Bauche, S., Vellieux, G., Sternberg, D., Fontenille, M. J., De Bruyckere, E., Davoine, C. S., Brochier, G., Messeant, J., Wolf, L., Fardeau, M., Lacene, E., Romero, N., Koenig, J., Fournier, E., Hantai, D., Streichenberger, N., Manel, V., Lacour, A., Nadaj-Pakleza, A., Sukno, S., Bouhour, F., Laforet, P., Fontaine, B., Strochlic, L., Eymard, B., Chevessier, F., Stojkovic, T. and Nicole, S.	Mutations in GFPT1-related congenital myasthenic syndromes are associated with synaptic morphological defects and underlie a tubular aggregate myopathy with synaptopathy	J Neurol	Mutations in GFPT1 (glutamine-fructose-6-phosphate transaminase 1), a gene encoding an enzyme involved in glycosylation of ubiquitous proteins, cause a limb-girdle congenital myasthenic syndrome (LG-CMS) with tubular aggregates (TAs) characterized predominantly by affection of the proximal skeletal muscles and presence of highly organized and remodeled sarcoplasmic tubules in patients' muscle bio…	Case series	11	GFPT1	Congenital myasthenic syndrome due to a defect of glycosylation caused by pathogenic variants in GFPT1	610542: Myasthenic syndrome, congenital, 12; CMS12	c.207G>A p.Gly39_Lys75 delinsGlu c.332G>A p.Arg111His c.331C>T p.Arg111Cys c.331C>T p.Arg111Cys c.1174A>C p.Thr392Pro c.1496T>G p.Met499Arg c.331C>T p. Arg111Cys c.2002-1G>C (p.?) c.331C>T p. Arg111Cys c.2002-1G>C (p.?) c.332G>A p.Arg111His c.*22C>A 3’ UTR c.332G>A p.Arg111His c.949A>T p.Met317Leu c.44C>T p.Thr15Met c.44C>T p.Thr15Met c.332G>A p.Arg111His c.739C>G p.Leu247Val c.1882A>G p.Ile628Va…	AR homozygous and compound heterozygous	Acetylcholinesterase inhibitors	Positive	3,4-diaminopyridine	Positive	N/A	N/A	N/A	N/A
25	29118959	2017	Bevilacqua, J. A., Lara, M., Diaz, J., Campero, M., Vazquez, J. and Maselli, R. A.	Congenital Myasthenic Syndrome due to DOK7 mutations in a family from Chile	Eur J Transl Myol	Congenital myasthenic syndromes (CMS) are neuromuscular transmission disorders caused by mutations in genes encoding neuromuscular junction proteins. A 61-year-old female and her older sister showed bilateral ptosis, facial and proximal limb weakness, and scoliosis since childhood. Another female sibling had milder signs, while other family members were asymptomatic. Facial nerve repetitive stimu…	Familial case report	3	DOK7	Congenital myasthenic syndrome due to defects in docking protein 7 caused by pathogenic variants in DOK7	254300: Myasthenic syndrome, congenital, 10; CMS10	c.1457delC p.Pro486Argfs*13 c.473G>A p.Arg158Gln	AR compound heterozygous	Salbutamol	Positive	Pyridostigmine	No response	N/A	N/A	N/A	N/A
26	29093122	2017	Bhoopalan, S. V. and Jain, R.	Case 2: Hypotonia and Muscle Weakness since Birth in a 2-year-old Boy	Pediatr Rev		Case report	1	DOK7	Congenital myasthenic syndrome due to defects in docking protein 7 caused by pathogenic variants in DOK7	254300: Myasthenic syndrome, congenital, 10; CMS10	N/A	N/A	Salbutamol	Positive	N/A	N/A	N/A	N/A	N/A	N/A
27	29390429	2017	Feng, H. and Zhou, H.	New compound heterozygous variants of the cholinergic receptor nicotinic delta subunit gene in a Chinese male with congenital myasthenic syndrome: A case report	Medicine (Baltimore)	INTRODUCTION: Congenital myasthenic syndromes (CMS) are a group of genetic disorders that stem mostly from molecular defects in nicotinic acetylcholine receptors (AChRs). Defects in the cholinergic receptor nicotinic delta subunit (CHRND) gene can cause a series of myasthenic syndromes. Here, we report 2 new compound heterozygous variants of the CHRND gene in a Chinese male with CMS. CASE PRESENT…	Case report	1	CHRND	Fast-channel congenital myasthenic syndrome due to an acetylcholine receptor defect caused by pathogenic variants in CHRND	616322: Myasthenic syndrome, congenital, 3b, fast-channel; CMS3b	c.59G>A (ex2) p.W20X,498 + c.423G>C (ex5) p.W141C	AR compound heterozygous	Pyridostigmine	Positive	N/A	N/A	N/A	N/A	N/A	N/A
28	28716243	2017	Gaist, D., Mogensen, J., Pedersen, E. G., Schroder, H. D., Vissing, J., Andersen, H. and Hertz, J. M.	DOK7 congenital myasthenia may be associated with severe mitral valve insufficiency	J Neurol Sci		Familial case report	2	DOK7	Congenital myasthenic syndrome due to defects in docking protein 7 caused by pathogenic variants in DOK7	254300: Myasthenic syndrome, congenital, 10; CMS10	c.1236C>A; p.(Cys412*) + c.514G>A; p.(Gly172Arg)	AR compound heterozygous	Salbutamol	Positive	N/A	N/A	N/A	N/A	N/A	N/A
29	28221305	2017	Karakaya, M., Ceyhan-Birsoy, O., Beggs, A. H. and Topaloglu, H.	A Novel Missense Variant in the AGRN Gene; Congenital Myasthenic Syndrome Presenting With Head Drop	J Clin Neuromuscul Dis	Congenital myasthenic syndromes (CMS) are a heterogeneous group of diseases of the neuromuscular junction caused by compromised synaptic transmission. Clinical features include early-onset weakness of limbs and oculobulbar muscles resulting in hypotonia, bulbar paresis, ptosis, and hypoventilation. The first dropped head syndrome in children were detected in 2 patients with LMNA and SEPN1 mutatio…	Case report	1	AGRN	Congenital myasthenic syndrome due to agrin deficiency caused by pathogenic variants in AGRN	615120: Myasthenic syndrome, congenital, 8; CMS8	c.5023G.A p.Gly1675Ser	AR homozygous	Salbutamol	Positive	Pyridostigmine	Positive	N/A	N/A	N/A	N/A
30	28433477	2017	Luo, S., Cai, S., Maxwell, S., Yue, D., Zhu, W., Qiao, K., Zhu, Z., Zhou, L., Xi, J., Lu, J., Beeson, D. and Zhao, C.	Novel mutations in the C-terminal region of GMPPB causing limb-girdle muscular dystrophy overlapping with congenital myasthenic syndrome	Neuromuscul Disord	Mutations in the GMPPB gene may underlie both limb girdle muscular dystrophy (LGMD) and congenital myasthenic syndrome (CMS). Forty-one cases have been reported to date and hotspot mutations are emerging in the Caucasian population. Clinical and pathological features of 5 patients with compound heterozygous GMPPB mutations were collected and retrospectively reviewed. In vitro functional analysis …	Case series	5	GMPPB	Congenital myasthenic syndrome due to a defect of glycosylation caused by pathogenic variants in GMPPB	N/A	NM_021971.1 c.1070G>A c.1018G>A p.Arg357His p.Gly340Arg c.1070G>A c.C877T p.Arg357His p.Arg293Trp c.1070G>A c.C966A p.Arg357His p.Asn322Lys	AR compound heterozygous	Pyridostigmine	Positive	N/A	N/A	N/A	N/A	N/A	N/A
31	27874200	2017	Montagnese, F., Klupp, E., Karampinos, D. C., Biskup, S., Glaser, D., Kirschke, J. S. and Schoser, B.	Two patients with GMPPB mutation: The overlapping phenotypes of limb-girdle myasthenic syndrome and limb-girdle muscular dystrophy dystroglycanopathy	Muscle Nerve	INTRODUCTION: Mutations in the guanosine diphosphate-mannose pyrophosphorylase-B gene (GMPPB) have been identified in congenital muscular dystrophies, limb-girdle muscular dystrophy (LGMD2T), and congenital myasthenic syndromes (CMSs); overall, 41 patients have been described. METHODS: Two patients presented with a myasthenic syndrome (patient 1; 74 years old) and rhabdomyolysis (patient 2; 23 ye…	Case series	2	GMPPB	Congenital myasthenic syndrome due to a defect of glycosylation caused by pathogenic variants in GMPPB	N/A	c.79G>C p.Asp27His c.79G>C/c.859C>T p.Asp27His/p.Arg287Trp	AR homozygous and compound heterozygous	Pyridostigmine	Positive	Salbutamol	No response	N/A	N/A	N/A	N/A
32	29054425	2017	Natera-de Benito, D., Topf, A., Vilchez, J. J., Gonzalez-Quereda, L., Dominguez-Carral, J., Diaz-Manera, J., Ortez, C., Bestue, M., Gallano, P., Dusl, M., Abicht, A., Muller, J. S., Senderek, J., Garcia-Ribes, A., Muelas, N., Evangelista, T., Azuma, Y., McMacken, G., Paipa Merchan, A., Rodriguez Cruz, P. M., Camacho, A., Jimenez, E., Miranda-Herrero, M. C., Santana-Artiles, A., Garcia-Campos, O.,…	Molecular characterization of congenital myasthenic syndromes in Spain	Neuromuscul Disord	Congenital myasthenic syndromes (CMS) are a heterogeneous group of genetic disorders, all of which impair neuromuscular transmission. Epidemiological data and frequencies of gene mutations are scarce in the literature. Here we describe the molecular genetic and clinical findings of sixty-four genetically confirmed CMS patients from Spain. Thirty-six mutations in the CHRNE, RAPSN, COLQ, GFPT1, DOK…	Case series	16	CHRNE	Congenital myasthenic syndrome due to primary acetylcholine receptor deficiency caused by pathogenic variants in CHRNE	608931: Myasthenic syndrome, congenital, 4c, associated with acetylcholine receptor deficiency; CMS4c	c.130insG p.Glu44Glyfs*3 c.1353insG p.Asn542-Glufs*4 c.1327delG p.Glu443Lysfs*64 c.1373_1375delGCT p.Cys458del		Pyridostigmine	Positive	N/A	N/A	N/A	N/A	N/A	N/A
								11	RAPSN	Congenital myasthenic syndrome due to endplate rapsyn deficiency caused by pathogenic variants in RAPSN	616326: Myasthenic syndrome, congenital, 11, associated with acetylcholine receptor deficiency; CMS11	c.264C > A p.Asn88Lys c.869T > C p.Leu290Pro c.1185delG p.Thr396Pfs*12 c.358delC p.Gln120Serfs*8 c.493G > A p.Val165Met		Pyridostigmine	Positive	N/A	N/A	N/A	N/A	N/A	N/A
								9	COLQ	Congenital myasthenic syndrome due to endplate acetylcholinesterase deficiency caused by pathogenic variants in COLQ	603034: Myasthenic syndrome, congenital, 5; CMS5	c.1195 + 1G > A (IVS15 + 1G>A c.1289A > C p.Tyr430Ser c.157dupC p.Leu53Profs*81 c.640G > T p.Glu214*		Salbutamol	Positive	N/A	N/A	N/A	N/A	N/A	N/A
								8	GFPT1	Congenital myasthenic syndrome due to a defect of glycosylation caused by pathogenic variants in GFPT1	610542: Myasthenic syndrome, congenital, 12; CMS12	c.1526T > C p.Met509Thr c.1588C > T p.Arg530Trp c.1529T > C p.Met510Thr c.*22C > A n/a c.1332_1335dup p.Asp446Glyfs*10 c.686-2A > G IVS8-2A > G		Pyridostigmine	Positive	3,4-diaminopyridine	Positive	N/A	N/A	N/A	N/A
								7	DOK7	Congenital myasthenic syndrome due to defects in docking protein 7 caused by pathogenic variants in DOK7	254300: Myasthenic syndrome, congenital, 10; CMS10	c.98C > T p.Ala33Val c.1124_1127dup p.Ala378Serfs*30 c.101-1G > T IVS2-1G > T c.54 + 12_54 + 23del n/a		Salbutamol		N/A	N/A	N/A	N/A	N/A	N/A
								5	CHRNG	N/A				N/A		N/A	N/A	N/A	N/A	N/A	N/A
								3	GMPPB	Congenital myasthenic syndrome due to a defect of glycosylation caused by pathogenic variants in GMPPB		c.553C > T p.Arg185Cys		Pyridostigmine	Positive	N/A	N/A	N/A	N/A	N/A	N/A
								2	CHAT	Congenital myasthenic syndrome due to endplate choline acetyltransferase deficiency caused by pathogenic variants in CHAT	254210: Myasthenic syndrome, congenital, 6, presynaptic; CMS6	c.1231G > A p.Gly411Arg c.1300G > A p.Gly434Ser c.1249G > A p.Gly417Arg c.1505T > C p.Leu502Pro		Pyridostigmine	Positive	3,4-diaminopyridine	Positive	N/A	N/A	N/A	N/A
								1	CHRNA1	Slow-channel congenital myasthenic syndrome due to an acetylcholine receptor defect caused by a pathogenic variant in CHRNA1	601462: Myasthenic syndrome, congenital, 1a, slow-channel; CMS1a	c.592G > A (p.Gly198Ser)		Pyridostigmine	No response	Ephedrine	Positive	N/A	N/A	N/A	N/A
								1	CHRNB1	Slow-channel congenital myasthenic syndrome due to an acetylcholine receptor defect caused by a pathogenic variant in CHRNB1	616313: Myasthenic syndrome, congenital, 2a, slow-channel; CMS2a	c.878T > A (p.Leu293Gln)		Pyridostigmine	No response	Salbutamol	Positive	N/A	N/A	N/A	N/A
								1	CHRNE	Slow-channel congenital myasthenic syndrome due to an acetylcholine receptor defect caused by a pathogenic variant in CHRNE	605809: Myasthenic syndrome, congenital, 4a, slow-channel; CMS4a	c.865C > T p.Leu289Phe		Pyridostigmine	No response	Fluoxetine	Positive	N/A	N/A	N/A	N/A
33	28221310	2017	Padmanabha, H., Saini, A. G., Sankhyan, N. and Singhi, P.	COLQ-Related Congenital Myasthenic Syndrome and Response to Salbutamol Therapy	J Clin Neuromuscul Dis		Case report	1	COLQ	Congenital myasthenic syndrome due to endplate acetylcholinesterase deficiency caused by pathogenic variants in COLQ	603034: Myasthenic syndrome, congenital, 5; CMS5	chr3: 15507847; C>G	AR homozygous	Salbutamol	Positive	Pyridostigmine	Negative	N/A	N/A	N/A	N/A
34	28289174	2017	Roy, B. and Chahin, N.	Clinical Reasoning: A 14-year-old boy with fatigue and episodic worsening of weakness	Neurology		Case report	1	DOK7	Congenital myasthenic syndrome due to defects in docking protein 7 caused by pathogenic variants in DOK7	254300: Myasthenic syndrome, congenital, 10; CMS10	c.1124_1127dupTGCC + c.1378dupC exon 7	AR compound heterozygous	Salbutamol	Positive	N/A	N/A	N/A	N/A	N/A	N/A
35	28253535	2017	Salpietro, V., Lin, W., Delle Vedove, A., Storbeck, M., Liu, Y., Efthymiou, S., Manole, A., Wiethoff, S., Ye, Q., Saggar, A., McElreavey, K., Krishnakumar, S. S., Pitt, M., Bello, O. D., Rothman, J. E., Basel-Vanagaite, L., Hubshman, M. W., Aharoni, S., Manzur, A. Y., Wirth, B. and Houlden, H.	Homozygous mutations in VAMP1 cause a presynaptic congenital myasthenic syndrome	Ann Neurol	We report 2 families with undiagnosed recessive presynaptic congenital myasthenic syndrome (CMS). Whole exome or genome sequencing identified segregating homozygous variants in VAMP1: c.51_64delAGGTGGGGGTCCCC in a Kuwaiti family and c.146G>C in an Israeli family. VAMP1 is crucial for vesicle fusion at presynaptic neuromuscular junction (NMJ). Electrodiagnostic examination showed severely low comp…	Case series	4	VAMP1	Congenital myasthenic syndrome due to a vesicle associated membrane protein 1 defect caused by a pathogenic variant in VAMP1	N/A	NM_014231: c.51_64delAGGTGGGGGTCCCC; p.Gly18TrpfsTer5* c.146G>C; p.Arg49Pro	AR homozygous	Pyridostigmine	Positive	N/A	N/A	N/A	N/A	N/A	N/A
36	28733338	2017	Schorling, D. C., Rost, S., Lefeber, D. J., Brady, L., Muller, C. R., Korinthenberg, R., Tarnopolsky, M., Bonnemann, C. G., Rodenburg, R. J., Bugiani, M., Beytia, M., Kruger, M., van der Knaap, M. and Kirschner, J.	Early and lethal neurodegeneration with myasthenic and myopathic features: A new ALG14-CDG	Neurology	OBJECTIVE: To describe the presentation and identify the cause of a new clinical phenotype, characterized by early severe neurodegeneration with myopathic and myasthenic features. METHODS: This case study of 5 patients from 3 families includes clinical phenotype, serial MRI, electrophysiologic testing, muscle biopsy, and full autopsy. Genetic workup included whole exome sequencing and segregation…	Case series	5	ALG14	Congenital myasthenic syndrome due to a defect of glycosylation caused by pathogenic variants in ALG14	616227: Myasthenic syndrome, congenital, 15; CMS15	c.220 G.A (p.Asp74Asn) c.422T.G (p.Val141Gly) c.326G.A (p.Arg109Gln)	AR homozygous and compound heterozygous	Pyridostigmine	Positive	N/A	N/A	N/A	N/A	N/A	N/A
37	27397848	2017	Visser, A. C., Laughlin, R. S., Litchy, W. J., Benarroch, E. E. and Milone, M.	Rapsyn congenital myasthenic syndrome worsened by fluoxetine	Muscle Nerve	INTRODUCTION: Fluoxetine is a selective serotonin reuptake inhibitor and long-lived open channel blocker of the acetylcholine receptor, often used in the treatment of slow-channel congenital myasthenic syndromes (CMS). METHODS: We report a 42-year-old woman who had a history of episodic limb weakness that worsened after initiation of fluoxetine for treatment of depression. Genetic testing for CMS…	Case report	1	RAPSN	Congenital myasthenic syndrome due to endplate rapsyn deficiency caused by pathogenic variants in RAPSN	616326: Myasthenic syndrome, congenital, 11, associated with acetylcholine receptor deficiency; CMS11	c.264C>A; p.Asn88Lys	AR homozygous	Fluoxetine	Negative	Pyridostigmine	Positive	N/A	N/A	N/A	N/A
38	29088354	2017	Wang, H., Salter, C. G., Refai, O., Hardy, H., Barwick, K. E. S., Akpulat, U., Kvarnung, M., Chioza, B. A., Harlalka, G., Taylan, F., Sejersen, T., Wright, J., Zimmerman, H. H., Karakaya, M., Stuve, B., Weis, J., Schara, U., Russell, M. A., Abdul-Rahman, O. A., Chilton, J., Blakely, R. D., Baple, E. L., Cirak, S. and Crosby, A. H.	Choline transporter mutations in severe congenital myasthenic syndrome disrupt transporter localization	Brain	The presynaptic, high-affinity choline transporter is a critical determinant of signalling by the neurotransmitter acetylcholine at both central and peripheral cholinergic synapses, including the neuromuscular junction. Here we describe an autosomal recessive presynaptic congenital myasthenic syndrome presenting with a broad clinical phenotype due to homozygous choline transporter missense mutati…	Case series	4	SLC5A7	Congenital myasthenic syndrome due to a choline transporter defect caused by pathogenic variants in SLC5A7	617143: Myasthenic syndrome, congenital, 20, presynaptic; CMS20	NM_021815.2 c.282 T4A;p.Ser94Arg c.335T4A;p.Val112Glu c.335T4A; p.Val112Glu c.629 C4T; Pro210Leu	AR homozygous	Pyridostigmine	Equivocal	Ephedrine	Positive	3,4-diaminopyridine	No response	N/A	N/A
39	29258548	2017	Xi, J., Yan, C., Liu, W. W., Qiao, K., Lin, J., Tian, X., Wu, H., Lu, J., Wong, L. J., Beeson, D. and Zhao, C.	Novel SEA and LG2 Agrin mutations causing congenital Myasthenic syndrome	Orphanet J Rare Dis	BACKGROUND: Congenital myasthenic syndrome caused by mutations in AGRN, a gene encoding a protein with a crucial function at the neuromuscular junction, is a rare disorder. There are few studies in this area. We here present two cases with novel mutations of AGRN of which we further investigated possible pathogenesis. RESULTS: Patient 1 had general limb weakness with fluctuation and deterioration…	Case series	2	AGRN	Congenital myasthenic syndrome due to agrin deficiency caused by pathogenic variants in AGRN	615120: Myasthenic syndrome, congenital, 8; CMS8	c.3527 T>C, p.L1176P c.5092C > T, p.R1698C	AR homozygous	Pyridostigmine	No response	Salbutamol	Equivocal/positive	N/A	N/A	N/A	N/A
40	28464723	2017	Yis, U., Becker, K., Kurul, S. H., Uyanik, G., Bayram, E., Haliloglu, G., Polat, A. I., Ayanoglu, M., Okur, D., Tosun, A. F., Serdaroglu, G., Yilmaz, S., Topaloglu, H., Anlar, B., Cirak, S. and Engel, A. G.	Genetic Landscape of Congenital Myasthenic Syndromes From Turkey: Novel Mutations and Clinical Insights	J Child Neurol	Congenital myasthenic syndromes are clinically and genetically heterogeneous disorders of neuromuscular transmission. Most are treatable, but certain subtypes worsen with cholinesterase inhibitors. This underlines the importance of genetic diagnosis. Here, the authors report on cases with genetically proven congenital myasthenic syndromes from Turkey. The authors retrospectively reviewed their ex…	Case series	8	CHAT	Congenital myasthenic syndrome due to endplate choline acetyltransferase deficiency caused by pathogenic variants in CHAT	254210: Myasthenic syndrome, congenital, 6, presynaptic; CMS6	c.1249G>A p.G417R c.1007T>C p.I336T	AR homozygous and compound heterozygous	Acetylcholinesterase inhibitors	Positive	3,4-diaminopyridine	Positive	N/A	N/A	N/A	N/A
								2	MYO9A	Congenital myasthenic syndrome due to a defect in Myosin 9A caused by pathogenic variants in MYO9A	N/A	c.5093A>G p.D1698G	AR homozygous and compound heterozygous	See 27259756	Positive	N/A	N/A	N/A	N/A	N/A	N/A
								14	COLQ	Congenital myasthenic syndrome due to endplate acetylcholinesterase deficiency caused by pathogenic variants in COLQ	603034: Myasthenic syndrome, congenital, 5; CMS5	p.W148* c.1082delC p.P361Lfs*64 c.706C>T p.R236* c.1281C>T p.C427 = (splice mutation) c.679C>T p.R227* c.1169A>G p.N390S c.444G>A/c.706C>T p.W148*/p.R236*	AR homozygous and compound heterozygous	Acetylcholinesterase inhibitors	Negative	Salbutamol	Positive	N/A	N/A	N/A	N/A
								14	CHRNE	Congenital myasthenic syndrome due to primary acetylcholine receptor deficiency caused by pathogenic variants in CHRNE	608931: Myasthenic syndrome, congenital, 4c, associated with acetylcholine receptor deficiency; CMS4c	e1206ins19 (c.1248_1266dup19) e70insG (c.130dupG) e70insG/IVS7+2T>C (c.130dupG/c.802+2T>C) e1276delG (c.1336delG) e59ins5 (c.115_119dup5) c.393C>G p.Y131* c.803-2A>G c.1327delG/c.1319_1326+15del23b	AR homozygous and compound heterozygous	Acetylcholinesterase inhibitors	Positive	N/A	N/A	N/A	N/A	N/A	N/A
								1	CHRND	Congenital myasthenic syndrome due to primary acetylcholine receptor deficiency caused by pathogenic variants in CHRND	616323: Myasthenic syndrome, congenital, 3c, associated with acetylcholine receptor deficiency; CMS3c	c.991C>T p.L331F	AR homozygous	Acetylcholinesterase inhibitors	Positive	N/A	N/A	N/A	N/A	N/A	N/A
								1	AGRN	Congenital myasthenic syndrome due to agrin deficiency caused by pathogenic variants in AGRN	615120: Myasthenic syndrome, congenital, 8; CMS8	c.5023G>A p.G1675S	AR homozygous	Pyridostigmine	Positive	N/A	N/A	N/A	N/A	N/A	N/A
								2	MUSK	Congenital myasthenic syndrome due to defects in MuSK caused by pathogenic variants in MUSK	616325: Myasthenic syndrome, congenital, 9, associated with acetylcholine receptor deficiency; CMS9	c.114T>A p.D38E	AR homozygous	Pyridostigmine	Negative	Salbutamol	Positive	N/A	N/A	N/A	N/A
								1	GFPT1	Congenital myasthenic syndrome due to a defect of glycosylation caused by pathogenic variants in GFPT1	610542: Myasthenic syndrome, congenital, 12; CMS12	c.686-2A>G	AR homozygous	N/A		N/A	N/A	N/A	N/A	N/A	N/A
41	28937031	2017	Zhang, Y., Dai, Y., Han, J. N., Chen, Z. H., Ling, L., Pu, C. Q., Cui, L. Y. and Huang, X. S.	A Novel AGRN Mutation Leads to Congenital Myasthenic Syndrome Only Affecting Limb-girdle Muscle	Chin Med J (Engl)	BACKGROUND: Congenital myasthenic syndromes (CMSs) are a group of clinically and genetically heterogeneous disorders caused by impaired neuromuscular transmission. The defect of AGRN was one of the causes of CMS through influencing the development and maintenance of neuromuscular transmission. However, CMS reports about this gene mutation were rare. Here, we report a novel homozygous missense mut…	Familial case report	3	AGRN	Congenital myasthenic syndrome due to agrin deficiency caused by pathogenic variants in AGRN	615120: Myasthenic syndrome, congenital, 8; CMS8	c.5302G>C, p. A1768P	AR homozygous	Pyridostigmine	Negative	Salbutamol	Positive	Ephedrine	Positive	N/A	N/A
42	27648472	2016	Engel, A. G., Selcen, D., Shen, X. M., Milone, M. and Harper, C. M.	Loss of MUNC13-1 function causes microcephaly, cortical hyperexcitability, and fatal myasthenia	Neurol Genet	OBJECTIVE: To identify the molecular basis of a fatal syndrome of microcephaly, cortical hyperexcitability, and myasthenia. METHODS: We performed clinical and in vitro microelectrode studies of neuromuscular transmission, examined neuromuscular junctions cytochemically and by electron microscopy (EM), and searched for mutations by Sanger and exome sequencing. RESULTS: Neuromuscular transmission w…	Case report	1	UNC13A	Congenital myasthenic syndrome due to a mammalian uncoordinated-13 protein defect caused by a pathogenic variant in UNC13A	N/A	NM_001080421.2; c.304C.T/p.Gln102*	AR homozygous	Pyridostigmine	Equivocal	3,4-diaminopyridine	Positive	N/A	N/A	N/A	N/A
43	27569547	2016	Bauche, S., O'Regan, S., Azuma, Y., Laffargue, F., McMacken, G., Sternberg, D., Brochier, G., Buon, C., Bouzidi, N., Topf, A., Lacene, E., Remerand, G., Beaufrere, A. M., Pebrel-Richard, C., Thevenon, J., El Chehadeh-Djebbar, S., Faivre, L., Duffourd, Y., Ricci, F., Mongini, T., Fiorillo, C., Astrea, G., Burloiu, C. M., Butoianu, N., Sandu, C., Servais, L., Bonne, G., Nelson, I., Desguerre, I., N…	Impaired Presynaptic High-Affinity Choline Transporter Causes a Congenital Myasthenic Syndrome with Episodic Apnea	Am J Hum Genet	The neuromuscular junction (NMJ) is one of the best-studied cholinergic synapses. Inherited defects of peripheral neurotransmission result in congenital myasthenic syndromes (CMSs), a clinically and genetically heterogeneous group of rare diseases with fluctuating fatigable muscle weakness as the clinical hallmark. Whole-exome sequencing and Sanger sequencing in six unrelated families identified …	Case series	5	SLC5A7	Congenital myasthenic syndrome due to a choline transporter defect caused by pathogenic variants in SLC5A7	617143: Myasthenic syndrome, congenital, 20, presynaptic; CMS20	c.194G>A (p.Gly65Glu) c.313C>T (p.Pro105Ser) c.143A>G (p.Asp48Gly) c.143A>G (p.Asp48Gly) c.524A>G (p.Tyr175Cys) c.1030G>C (p.Val344Leu) c.331T>C (p.Tyr111His) c.1252T>G (p.Phe418Val) c.872T>C (p.Ile291Thr) c.1336A>G (p.Arg446Gly)	AR homozygous and compound heterozygous	Acetylcholinesterase inhibitors	Positive	N/A	N/A	N/A	N/A	N/A	N/A
44	27717316	2016	Chang, T., Cossins, J. and Beeson, D.	A rare c.183_187dupCTCAC mutation of the acetylcholine receptor CHRNE gene in a South Asian female with congenital myasthenic syndrome: a case report	BMC Neurol	BACKGROUND: Congenital myasthenic syndromes (CMSs) occur as a result of genetic mutations that cause aberrations in structure and/or function of proteins involved in neuromuscular transmission. Acetylcholine receptor epsilon (epsilon) subunit (CHRNE) gene mutations account for about 30-50 % of genetically diagnosed cases. We report a rare CHRNE gene mutation in a South Asian female with CMS. CASE…	Case report	1	CHRNE	Congenital myasthenic syndrome due to primary acetylcholine receptor deficiency caused by pathogenic variants in CHRNE	608931: Myasthenic syndrome, congenital, 4c, associated with acetylcholine receptor deficiency; CMS4c	c.183_187dupCTCAC	AR homozygous	Pyridostigmine	Positive	N/A	N/A	N/A	N/A	N/A	N/A
45	27139332	2016	Dietz, M., Jones, M., Svoboda, M. and Finanger, E.	Case 3: Episodic Weakness in an 18-month-old Girl	Pediatr Rev		Case report	1	RAPSN	Congenital myasthenic syndrome due to endplate rapsyn deficiency caused by pathogenic variants in RAPSN	616326: Myasthenic syndrome, congenital, 11, associated with acetylcholine receptor deficiency; CMS11	N/A	N/A	Pyridostigmine	Positive	N/A	N/A	N/A	N/A	N/A	N/A
46	26910802	2016	Garg, N., Yiannikas, C., Hardy, T. A., Belaya, K., Cheung, J., Beeson, D. and Reddel, S. W.	Late presentations of congenital myasthenic syndromes: How many do we miss?	Muscle Nerve	INTRODUCTION: Congenital myasthenic syndromes (CMS) usually present neonatally or in early childhood. When they present later, they may be mistaken for seronegative autoimmune myasthenia, and unnecessary immunosuppressive treatment may be administered. METHODS: Patients who met criteria for seronegative generalized myasthenia without congenital or early childhood onset, but with an affected sibli…	Case series	5	RAPSN	Congenital myasthenic syndrome due to endplate rapsyn deficiency caused by pathogenic variants in RAPSN	616326: Myasthenic syndrome, congenital, 11, associated with acetylcholine receptor deficiency; CMS11	N88K, S201N, E162K	AR homozygous and compound heterozygous	Pyridostigmine	Positive	3,4-diaminopyridine	Positive	N/A	N/A	N/A	N/A
								2	CHRNA1	Fast-channel congenital myasthenic syndrome due to an acetylcholine receptor defect caused by pathogenic variants in CHRNA1	608930: Myasthenic syndrome, congenital, 1b, fast-channel; CMS1b	F256L + R55H	AR compound heterozygous	Pyridostigmine	Positive	3,4-diaminopyridine	Positive	Corticosteroids	Positive	N/A	N/A
47	26659129	2016	Habbout, K., Poulin, H., Rivier, F., Giuliano, S., Sternberg, D., Fontaine, B., Eymard, B., Morales, R. J., Echenne, B., King, L., Hanna, M. G., Mannikko, R., Chahine, M., Nicole, S. and Bendahhou, S.	A recessive Nav1.4 mutation underlies congenital myasthenic syndrome with periodic paralysis	Neurology	OBJECTIVE: To determine the molecular basis of a complex phenotype of congenital muscle weakness observed in an isolated but consanguineous patient. METHODS: The proband was evaluated clinically and neurophysiologically over a period of 15 years. Genetic testing of candidate genes was performed. Functional characterization of the candidate mutation was done in mammalian cell background using whol…	Case report	1	SCN4A	Congenital myasthenic syndrome due to a sodium channel 1.4 defect caused by pathogenic variants in SCN4A	614198: Myasthenic syndrome, congenital, 16; CMS16	c.4360C.T (p.R1454W)	AR homozygous	Pyridostigmine	Equivocal	Acetazolamide	No response	N/A	N/A	N/A	N/A
48	27588369	2016	Luan, X., Tian, W. and Cao, L.	Limb-girdle congenital myasthenic syndrome in a Chinese family with novel mutations in MUSK gene and literature review	Clin Neurol Neurosurg	OBJECTIVES: To describe the clinical and genetic features of a Chinese congenital myasthenic syndromes (CMS) patient with two novel missense mutations in muscle specific receptor tyrosine kinase (MUSK) gene and review 15 MUSK-related CMS patients from 8 countries. METHODS: The patient was a 30-year-old man with chronic progressively proximal limb weakness for 22 years and diagnosed as muscular dy…	Case report	1	MUSK	Congenital myasthenic syndrome due to defects in MuSK caused by pathogenic variants in MUSK	616325: Myasthenic syndrome, congenital, 9, associated with acetylcholine receptor deficiency; CMS9	c.1948C > A (p.P650T), c.2384T > G (p.I795S)	AR compound heterozygous	Pyridostigmine	Negative	Salbutamol	Positive	N/A	N/A	N/A	N/A
49	26782015	2016	Natera-de Benito, D., Bestue, M., Vilchez, J. J., Evangelista, T., Topf, A., Garcia-Ribes, A., Trujillo-Tiebas, M. J., Garcia-Hoyos, M., Ortez, C., Camacho, A., Jimenez, E., Dusl, M., Abicht, A., Lochmuller, H., Colomer, J. and Nascimento, A.	Long-term follow-up in patients with congenital myasthenic syndrome due to RAPSN mutations	Neuromuscul Disord	Rapsyn (RAPSN) mutations are a common cause of postsynaptic congenital myasthenic syndromes. We present a comprehensive description of the clinical and molecular findings of ten patients with CMS due to mutations in RAPSN, mostly with a long-term follow-up. Two patients were homozygous and eight were heterozygous for the common p.Asn88Lys mutation. In three of the heterozygous patients we have id…	Case series	10	RAPSN	Congenital myasthenic syndrome due to endplate rapsyn deficiency caused by pathogenic variants in RAPSN	616326: Myasthenic syndrome, congenital, 11, associated with acetylcholine receptor deficiency; CMS11	c.264C>A; p.Asn88Lys c.869T>C; p.Leu290Pro c.1185delG; p.Thr396Pfs*12 c.280G>A; p.Glu94Lys c.1185delG; p.T396Pfs*12 c.358delC; p.Gln120Serfs*8 c.493G>A; p.Val165Met	AR homozygous and compound heterozygous	Pyridostigmine	Positive	3,4-diaminopyridine	Positive	Ephedrine	Equivocal	N/A	N/A
50	27634344	2016	Natera-de Benito, D., Dominguez-Carral, J., Muelas, N., Nascimento, A., Ortez, C., Jaijo, T., Arteaga, R., Colomer, J. and Vilchez, J. J.	Phenotypic heterogeneity in two large Roma families with a congenital myasthenic syndrome due to CHRNE 1267delG mutation. A long-term follow-up	Neuromuscul Disord	Congenital myasthenic syndromes (CMS) are a heterogeneous group of genetic disorders. Mutations in CHRNE are one of the most common cause of them and the varepsilon1267delG frameshifting mutation is described to be present on at least one allele of 60% of patients with CHRNE mutations. We present a comprehensive description of the heterogeneous clinical features of the CMS caused by the homozygou…	Case series	9	CHRNE	Congenital myasthenic syndrome due to primary acetylcholine receptor deficiency caused by pathogenic variants in CHRNE	608931: Myasthenic syndrome, congenital, 4c, associated with acetylcholine receptor deficiency; CMS4c	NM_000080.3 ɛ1267delG	AR homozygous	Pyridostigmine	Positive	3,4-diaminopyridine	Positive	Ephedrine	No response	N/A	N/A
51	27259756	2016	O'Connor, E., Topf, A., Muller, J. S., Cox, D., Evangelista, T., Colomer, J., Abicht, A., Senderek, J., Hasselmann, O., Yaramis, A., Laval, S. H. and Lochmuller, H.	Identification of mutations in the MYO9A gene in patients with congenital myasthenic syndrome	Brain	Congenital myasthenic syndromes are a group of rare and genetically heterogenous disorders resulting from defects in the structure and function of the neuromuscular junction. Patients with congenital myasthenic syndrome exhibit fatigable muscle weakness with a variety of accompanying phenotypes depending on the protein affected. A cohort of patients with a clinical diagnosis of congenital myasthe…	Case series	3	MYO9A	Congenital myasthenic syndrome due to a defect in Myosin 9A caused by pathogenic variants in MYO9A	N/A	rs149046541, p.R1517H rs142345927, p.R2283H rs150726107, p.D1698G	AR homozygous and compound heterozygous	Pyridostigmine	Positive	3,4-diaminopyridine	Equivocal	Fluoxetine	Negative	N/A	N/A
52	27590285	2016	O'Grady, G. L., Verschuuren, C., Yuen, M., Webster, R., Menezes, M., Fock, J. M., Pride, N., Best, H. A., Benavides Damm, T., Turner, C., Lek, M., Engel, A. G., North, K. N., Clarke, N. F., MacArthur, D. G., Kamsteeg, E. J. and Cooper, S. T.	Variants in SLC18A3, vesicular acetylcholine transporter, cause congenital myasthenic syndrome	Neurology	OBJECTIVE: To describe the clinical and genetic characteristics of presynaptic congenital myasthenic syndrome secondary to biallelic variants in SLC18A3. METHODS: Individuals from 2 families were identified with biallelic variants in SLC18A3, the gene encoding the vesicular acetylcholine transporter (VAChT), through whole-exome sequencing. RESULTS: The patients demonstrated features seen in presy…	Case series	2	SLC18A3	Congenital myasthenic syndrome due to a vesicular acetylcholine transporter defect caused by pathogenic variants in SLC18A3	617239: Myasthenic syndrome, congenital, 21, presynaptic; CMS21	c.557G.C; p.(Gly186Ala) + deletion of chr10: 46,949,255–51,780,909, hg19 c.1192G.C, p.(Asp398His)	AR homozygous and compound heterozygous	Pyridostigmine	Positive	3,4-diaminopyridine		N/A	N/A	N/A	N/A
53	27147698	2016	Rodriguez Cruz, P. M., Belaya, K., Basiri, K., Sedghi, M., Farrugia, M. E., Holton, J. L., Liu, W. W., Maxwell, S., Petty, R., Walls, T. J., Kennett, R., Pitt, M., Sarkozy, A., Parton, M., Lochmuller, H., Muntoni, F., Palace, J. and Beeson, D.	Clinical features of the myasthenic syndrome arising from mutations in GMPPB	J Neurol Neurosurg Psychiatry	BACKGROUND: Congenital myasthenic syndrome (CMS) due to mutations in GMPPB has recently been reported confirming the importance of glycosylation for the integrity of neuromuscular transmission. METHODS: Review of case notes of patients with mutations in GMPPB to identify the associated clinical, neurophysiological, pathological and laboratory features. In addition, serum creatine kinase (CK) leve…	Case series	8	GMPPB	Congenital myasthenic syndrome due to a defect of glycosylation caused by pathogenic variants in GMPPB	N/A	c.79G>C p.Asp27His c.781C>T p.Arg261Cys c.559C>T p.Gln187* c.308C>T p.Pro103Leu c.859C>T Arg287Trp c.130-3C>G splicing c.760G>A p.Val254Met c.907C>T p.Leu303Phe c.578T>C p.Ile193Thr	AR homozygous and compound heterozygous	Pyridostigmine	Positive	3,4-diaminopyridine	Positive	Salbutamol	Positive	N/A	N/A
54	26789281	2016	Tan, J. S., Ambang, T., Ahmad-Annuar, A., Rajahram, G. S., Wong, K. T. and Goh, K. J.	Congenital myasthenic syndrome due to novel CHAT mutations in an ethnic kadazandusun family	Muscle Nerve	INTRODUCTION: Choline acetyltransferase (CHAT) gene mutations cause a rare presynaptic congenital myasthenic syndrome due to impaired acetylcholine resynthesis. METHODS: We report 2 Kadazandusun brothers with novel heterozygous CHAT mutations. RESULTS: The siblings were from a family of 7 children of nonconsanguineous parents, 3 who died from apneic crises. Both presented in infancy with ptosis a…	Familial case report	2	CHAT	Congenital myasthenic syndrome due to endplate choline acetyltransferase deficiency caused by pathogenic variants in CHAT	254210: Myasthenic syndrome, congenital, 6, presynaptic; CMS6	p.Val306Leu p.Ser704del	AR compound heterozygous	Pyridostigmine	Positive	N/A	N/A	N/A	N/A	N/A	N/A
55	27779167	2016	Tan, J. Z., Man, Y. and Xiao, F.	A Missense Mutation in Epsilon-subunit of Acetylcholine Receptor Causing Autosomal Dominant Slow-channel Congenital Myasthenic Syndrome in a Chinese Family	Chin Med J (Engl)	BACKGROUND: Congenital myasthenic syndromes are a group of rare disorders that are clinically and genetically heterogeneous and caused by mutations in the genes encoding proteins of the neuromuscular junction. Here, we described a Chinese family that presented with phenotypes of classic slow-channel congenital myasthenic syndrome (SCCMS). METHODS: Clinical characteristics and electrophysiological…	Familial case report	3	CHRNE	Slow-channel congenital myasthenic syndrome due to an acetylcholine receptor defect caused by a pathogenic variant in CHRNE	605809: Myasthenic syndrome, congenital, 4a, slow-channel; CMS4a	c.865C>T (L289F)	AD heterozygous	Fluoxetine	Positive	N/A	N/A	N/A	N/A	N/A	N/A
56	26552645	2016	Tsao, C. Y.	Effective Treatment With Albuterol in DOK7 Congenital Myasthenic Syndrome in Children	Pediatr Neurol	BACKGROUND: Congenital myasthenic syndromes consist of rare disorders resulting from mutations in genes encoding for presynaptic, synaptic, and postsynaptic proteins that are involved in the signal transmission of the neuromuscular junction. They are characterized by fatigable weakness of the skeletal muscles with symptom onset from birth to early childhood. DOK7 (downstream of tyrosine kinase 7)…	Case report	1	DOK7	Congenital myasthenic syndrome due to defects in docking protein 7 caused by pathogenic variants in DOK7	254300: Myasthenic syndrome, congenital, 10; CMS10	c.957delC	AR homozygous	Salbutamol	Positive	N/A	N/A	N/A	N/A	N/A	N/A
57	27348204	2016	Verma, S., Mazell, S. N. and Shah, D. A.	Amifampridine phosphate in congenital myasthenic syndrome	Muscle Nerve			2	CHRNE	Congenital myasthenic syndrome due to primary acetylcholine receptor deficiency caused by pathogenic variants in CHRNE	608931: Myasthenic syndrome, congenital, 4c, associated with acetylcholine receptor deficiency; CMS4c	c.1327delG (p.Glu443-LysfsStop64) c.295C>T (p.Arg99Stop)	AR homozygous	3,4-diaminopyridine	Positive	N/A	N/A	N/A	N/A	N/A	N/A
58	25695962	2015	Al-Shahoumi, R., Brady, L. I., Schwartzentruber, J. and Tarnopolsky, M. A.	Two cases of congenital myasthenic syndrome with vocal cord paralysis	Neurology		Case series	1	COLQ	Congenital myasthenic syndrome due to endplate acetylcholinesterase deficiency caused by pathogenic variants in COLQ	603034: Myasthenic syndrome, congenital, 5; CMS5	c.1183G.A (p.D395N)	AR homozygous	Pyridostigmine	No response	3,4-diaminopyridine	Positive	Ephedrine	Positive	N/A	N/A
								1	MUSK	Congenital myasthenic syndrome due to defects in MuSK caused by pathogenic variants in MUSK	616325: Myasthenic syndrome, congenital, 9, associated with acetylcholine receptor deficiency; CMS9	c.7912T.G + c.2158A.G splice (rs200783529) + p.K720E	AR compound heterozygous	Pyridostigmine	Positive	3,4-diaminopyridine	Positive	N/A	N/A	N/A	N/A
59	25707578	2015	Arnold, W. D., Feldman, D. H., Ramirez, S., He, L., Kassar, D., Quick, A., Klassen, T. L., Lara, M., Nguyen, J., Kissel, J. T., Lossin, C. and Maselli, R. A.	Defective fast inactivation recovery of Nav 1.4 in congenital myasthenic syndrome	Ann Neurol	OBJECTIVE: To describe the unique phenotype and genetic findings in a 57-year-old female with a rare form of congenital myasthenic syndrome (CMS) associated with longstanding muscle fatigability, and to investigate the underlying pathophysiology. METHODS: We used whole-cell voltage clamping to compare the biophysical parameters of wild-type and Arg1457His-mutant Nav 1.4. RESULTS: Clinical and neu…	Case report	1	SCN4A	Congenital myasthenic syndrome due to a sodium channel 1.4 defect caused by pathogenic variants in SCN4A	614198: Myasthenic syndrome, congenital, 16; CMS16	c.4370G>A (p.Arg1457His)	AR homozygous	Pyridostigmine	No response	N/A	N/A	N/A	N/A	N/A	N/A
60	26080897	2015	Arredondo, J., Lara, M., Gospe, S. M., Jr., Mazia, C. G., Vaccarezza, M., Garcia-Erro, M., Bowe, C. M., Chang, C. H., Mezei, M. M. and Maselli, R. A.	Choline Acetyltransferase Mutations Causing Congenital Myasthenic Syndrome: Molecular Findings and Genotype-Phenotype Correlations	Hum Mutat	Choline acetyltransferase catalyzes the synthesis of acetylcholine at cholinergic nerves. Mutations in human CHAT cause a congenital myasthenic syndrome due to impaired synthesis of ACh; this severe variant of the disease is frequently associated with unexpected episodes of potentially fatal apnea. The severity of this condition varies remarkably, and the molecular factors determining this variab…	Case series	9	CHAT	Congenital myasthenic syndrome due to endplate choline acetyltransferase deficiency caused by pathogenic variants in CHAT	254210: Myasthenic syndrome, congenital, 6, presynaptic; CMS6	c.406G>A p.Val136Met c.556C>T p.Arg186Trp c.580G>T p.Val194Leu c.620G>A p.Arg207His c.620G>A p.Arg207His c.631C>G p.Pro211Ala c.1696C>T p.Arg566Cys c.2081C>G p.Ser694Cys	AR homozygous and compound heterozygous	Acetylcholinesterase inhibitors	Equivocal	3,4-diaminopyridine	Equivocal	N/A	N/A	N/A	N/A
61	25264167	2015	Azuma, Y., Nakata, T., Tanaka, M., Shen, X. M., Ito, M., Iwata, S., Okuno, T., Nomura, Y., Ando, N., Ishigaki, K., Ohkawara, B., Masuda, A., Natsume, J., Kojima, S., Sokabe, M. and Ohno, K.	Congenital myasthenic syndrome in Japan: ethnically unique mutations in muscle nicotinic acetylcholine receptor subunits	Neuromuscul Disord	Congenital myasthenic syndromes (CMS) are caused by mutations in genes expressed at the neuromuscular junction. Most CMS patients have been reported in Western and Middle Eastern countries, and only four patients with COLQ mutations have been reported in Japan. We here report six mutations in acetylcholine receptor (AChR) subunit genes in five Japanese patients. Five mutations are novel, and one …	Case series	1	CHRNB1	Fast-channel congenital myasthenic syndrome due to an acetylcholine receptor defect caused by pathogenic variants in CHRNB1	N/A	c.1394T>C εp.Met465Thr	AR homozygous	Edrophonium	Positive	Acetylcholinesterase inhibitors	No response	N/A	N/A	N/A	N/A
								1	CHRND	Congenital myasthenic syndrome due to primary acetylcholine receptor deficiency caused by pathogenic variants in CHRND	616323: Myasthenic syndrome, congenital, 3c, associated with acetylcholine receptor deficiency; CMS3c	c.1372-1G>A δp.Glu458Argfs*20 c.127C>T δp.Arg44Trp	AR compound heterozygous			N/A	N/A	N/A	N/A	N/A	N/A
								2	CHRNE	Congenital myasthenic syndrome due to primary acetylcholine receptor deficiency caused by pathogenic variants in CHRNE	608931: Myasthenic syndrome, congenital, 4c, associated with acetylcholine receptor deficiency; CMS4c	c.655_665del εp.Gly219Argfs*7 c.786C>G εp.Tyr262Ter c.911T>G εp.Leu304Arg	AR compound heterozygous			N/A	N/A	N/A	N/A	N/A	N/A
								1	CHRNE	Slow-channel congenital myasthenic syndrome due to an acetylcholine receptor defect caused by a pathogenic variant in CHRNE	605809: Myasthenic syndrome, congenital, 4a, slow-channel; CMS4a	c.850A>C εp.Thr284Pro	AD heterozygous			N/A	N/A	N/A	N/A	N/A	N/A
62	26133662	2015	Belaya, K., Rodriguez Cruz, P. M., Liu, W. W., Maxwell, S., McGowan, S., Farrugia, M. E., Petty, R., Walls, T. J., Sedghi, M., Basiri, K., Yue, W. W., Sarkozy, A., Bertoli, M., Pitt, M., Kennett, R., Schaefer, A., Bushby, K., Parton, M., Lochmuller, H., Palace, J., Muntoni, F. and Beeson, D.	Mutations in GMPPB cause congenital myasthenic syndrome and bridge myasthenic disorders with dystroglycanopathies	Brain	Congenital myasthenic syndromes are inherited disorders that arise from impaired signal transmission at the neuromuscular junction. Mutations in at least 20 genes are known to lead to the onset of these conditions. Four of these, ALG2, ALG14, DPAGT1 and GFPT1, are involved in glycosylation. Here we identify a fifth glycosylation gene, GMPPB, where mutations cause congenital myasthenic syndrome. F…	Case series	11	GMPPB	Congenital myasthenic syndrome due to a defect of glycosylation caused by pathogenic variants in GMPPB	N/A	c.79G4C p.Asp27His c.130-3C4G Splicing c.859C4T p.Arg287Trp c.308C4T p.Pro103Leu c.907C4T p.Leu303Phe c.781C4T p.Arg261Cys c.559C4T p.Gln187a c.578T4C p.Ile193Thr c.760G4A p.Val254Met c.64C4T p.Pro22Ser c.1000G4A p.Asp334Asn c.656T4C p.Ile219Thr c.860G4A p.Arg287Gln	AR homozygous and compound heterozygous	Pyridostigmine	Positive	3,4-diaminopyridine	Positive	Salbutamol	Positive	N/A	N/A
63	25900532	2015	Giarrana, M. L., Joset, P., Sticht, H., Robb, S., Steindl, K., Rauch, A. and Klein, A.	A severe congenital myasthenic syndrome with "dropped head" caused by novel MUSK mutations	Muscle Nerve	INTRODUCTION: Congenital myasthenic syndromes are rare. Mutations in MUSK were first described in 2004. Thirteen patients have been reported to date, mostly with a relatively mild course. The molecular diagnosis has implications for choice of treatment and genetic counseling. METHODS: Clinical course and electrophysiological, pathological, and genetic findings were assessed. RESULTS: We describe …	Case report	1	MUSK	Congenital myasthenic syndrome due to defects in MuSK caused by pathogenic variants in MUSK	616325: Myasthenic syndrome, congenital, 9, associated with acetylcholine receptor deficiency; CMS9	c.308A>G (p.Asn103Ser), c.496C>T (p.Arg166*)	AR compound heterozygous	Pyridostigmine	Negative	Salbutamol	Positive	3,4-diaminopyridine	Positive	N/A	N/A
64	25557462	2015	Guo, Y., Menezes, M. J., Menezes, M. P., Liang, J., Li, D., Riley, L. G., Clarke, N. F., Andrews, P. I., Tian, L., Webster, R., Wang, F., Liu, X., Shen, Y., Thorburn, D. R., Keating, B. J., Engel, A., Hakonarson, H., Christodoulou, J. and Xu, X.	Delayed diagnosis of congenital myasthenia due to associated mitochondrial enzyme defect	Neuromuscul Disord	Clinical phenotypes of congenital myasthenic syndromes and primary mitochondrial disorders share significant overlap in their clinical presentations, leading to challenges in making the correct diagnosis. Next generation sequencing is transforming molecular diagnosis of inherited neuromuscular disorders by identifying novel disease genes and by identifying previously known genes in undiagnosed pa…	Case series	1	COLQ	Congenital myasthenic syndrome due to endplate acetylcholinesterase deficiency caused by pathogenic variants in COLQ /	603034: Myasthenic syndrome, congenital, 5; CMS5	c.1228C > T (p.Arg410Trp) + c.679C > T (p.Arg227*)	AR compound heterozygous	Pyridostigmine	No response	Salbutamol	Positive	N/A	N/A	N/A	N/A
65	25849006	2015	Khadilkar, S., Bhutada, A., Nallamilli, B. and Hegde, M.	Limb girdle weakness responding to salbutamol: an Indian family with DOK7 mutation	Indian Pediatr	BACKGROUND: Congenital Myasthenic Syndromes (CMS) are heterogeneous genetic diseases. CASE CHARACTERISTICS: Two siblings presented with progressive limb girdle weakness without significant fluctuations or ocular muscle weakness. Repetitive nerve stimulation showed a decremental response and there was no response to pyridostigmine therapy. OUTCOME: A trial of salbutamol produced a remarkable, cons…	Familial case report	2	DOK7	Congenital myasthenic syndrome due to defects in docking protein 7 caused by pathogenic variants in DOK7	254300: Myasthenic syndrome, congenital, 10; CMS10	c.601C>T (p.R201X) + c.887A>G (p.Q296R)	AR compound heterozygous	Pyridostigmine	No response	Salbutamol	Positive	N/A	N/A	N/A	N/A
66	25500013	2015	Klein, A., Robb, S., Rushing, E., Liu, W. W., Belaya, K. and Beeson, D.	Congenital myasthenic syndrome caused by mutations in DPAGT	Neuromuscul Disord	Congenital myasthenic syndromes with prominent limb girdle involvement are an important differential diagnosis for congenital myopathies because of the therapeutic considerations. We present a case where accurate diagnosis was delayed for many years. Fluctuations of weakness were misinterpreted as effects of alternative treatments. Weakness was generalised, most prominently in the arms. Fatigabil…	Case report	1	DPAGT1	Congenital myasthenic syndrome due to a defect of glycosylation caused by pathogenic variants in DPAGT1	614750: Myasthenic syndrome, congenital, 13; CMS13	c.85A > T; p.Ile29Phe c.88C > T; p.Pro30Ser	AR compound heterozygous	Pyridostigmine	Positive	Salbutamol	Positive	N/A	N/A	N/A	N/A
67	26626625	2015	Logan, C. V., Cossins, J., Rodriguez Cruz, P. M., Parry, D. A., Maxwell, S., Martinez-Martinez, P., Riepsaame, J., Abdelhamed, Z. A., Lake, A. V., Moran, M., Robb, S., Chow, G., Sewry, C., Hopkins, P. M., Sheridan, E., Jayawant, S., Palace, J., Johnson, C. A. and Beeson, D.	Congenital Myasthenic Syndrome Type 19 Is Caused by Mutations in COL13A1, Encoding the Atypical Non-fibrillar Collagen Type XIII alpha1 Chain	Am J Hum Genet	The neuromuscular junction (NMJ) consists of a tripartite synapse with a presynaptic nerve terminal, Schwann cells that ensheathe the terminal bouton, and a highly specialized postsynaptic membrane. Synaptic structural integrity is crucial for efficient signal transmission. Congenital myasthenic syndromes (CMSs) are a heterogeneous group of inherited disorders that result from impaired neuromuscu…	Case series	3	COL13A1	Congenital myasthenic syndrome due to collagen 13 defects caused by pathogenic variants in COL13A1	616720: Myasthenic syndrome, congenital, 19; CMS19	c.1171delG c.523-1delG	AR homozygous	Pyridostigmine	No response	3,4-diaminopyridine	Positive	Salbutamol	Positive	N/A	N/A
68	26583494	2015	Lozowska, D., Ringel, S. P., Winder, T. L., Liu, J. and Liewluck, T.	Anticholinesterase Therapy Worsening Head Drop and Limb Weakness Due to a Novel DOK7 Mutation	J Clin Neuromuscul Dis	Dok-7 myasthenia is an autosomal recessive congenital myasthenic syndrome due to DOK7 mutations. Anticholinesterase therapy is ineffective and may worsen the weakness in patients with Dok-7 myasthenia or few other forms of congenital myasthenic syndromes. We describe a 31-year-old man previously diagnosed with seronegative myasthenia gravis. Repetitive stimulation of the right spinal accessory ne…	Case report	1	DOK7	Congenital myasthenic syndrome due to defects in docking protein 7 caused by pathogenic variants in DOK7	254300: Myasthenic syndrome, congenital, 10; CMS10	[c.1124_1127dupTGCC]+ [c.772+2_+4delinsCCGGGCAGGCGGGCA]	AR compound heterozygous	Pyridostigmine	Negative	Salbutamol	Positive	N/A	N/A	N/A	N/A
69	26296515	2015	Rodriguez Cruz, P. M., Palace, J., Ramjattan, H., Jayawant, S., Robb, S. A. and Beeson, D.	Salbutamol and ephedrine in the treatment of severe AChR deficiency syndromes	Neurology	OBJECTIVE: To evaluate the response to salbutamol and ephedrine in the treatment of congenital myasthenic syndromes due to CHRNE mutations causing severe acetylcholine receptor (AChR)deficiency. METHODS: A cohort study of 6 patients with severe AChR deficiency, symptomatic despite optimal therapy with anticholinesterase and 3,4-diaminopyridine, were analyzed for their response to the addition of …	Open-label trial	6	CHRNE	Congenital myasthenic syndrome due to primary acetylcholine receptor deficiency caused by pathogenic variants in CHRNE	608931: Myasthenic syndrome, congenital, 4c, associated with acetylcholine receptor deficiency; CMS4c	c.554-560del c.IV58-1G.A c.97211G.T c.1267-32_1319del	AR homozygous and compound heterozygous	Pyridostigmine	Positive	3,4-diaminopyridine	Positive	Salbutamol	Positive	N/A	N/A
70	26052878	2015	Selcen, D., Ohkawara, B., Shen, X. M., McEvoy, K., Ohno, K. and Engel, A. G.	Impaired Synaptic Development, Maintenance, and Neuromuscular Transmission in LRP4-Related Myasthenia	JAMA Neurol	IMPORTANCE: Congenital myasthenic syndromes (CMS) are heterogeneous disorders. Defining the phenotypic features, genetic basis, and pathomechanisms of a CMS is relevant to prognosis, genetic counseling, and therapy. OBJECTIVES: To characterize clinical, structural, electrophysiologic, and genetic features of a CMS and to search for optimal therapy. DESIGN, SETTINGS, AND PARTICIPANTS: Two sisters …	Familial case report	2	LRP4	Congenital myasthenic syndrome due to defects in LRP4 caused by pathogenic variants in LRP4	616304: Myasthenic syndrome, congenital, 17; CMS17	c.3698A>C p.Glu1233Ala	AR homozygous	Pyridostigmine	Negative	3,4-diaminopyridine	Negative	Salbutamol	Positive	N/A	N/A
71	26519543	2015	Whittaker, R. G., Herrmann, D. N., Bansagi, B., Hasan, B. A., Lofra, R. M., Logigian, E. L., Sowden, J. E., Almodovar, J. L., Littleton, J. T., Zuchner, S., Horvath, R. and Lochmuller, H.	Electrophysiologic features of SYT2 mutations causing a treatable neuromuscular syndrome	Neurology	OBJECTIVES: To describe the clinical and electrophysiologic features of synaptotagmin II (SYT2) mutations, a novel neuromuscular syndrome characterized by foot deformities and fatigable ocular and lower limb weakness, and the response to modulators of acetylcholine release. METHODS: We performed detailed clinical and neurophysiologic assessment in 2 multigenerational families with dominant SYT2 m…	Case series	8	SYT2	Congenital myasthenic syndrome due to a synaptotagmin defect caused by a pathogenic variant in SYT2	616040: Myasthenic syndrome, congenital, 7, presynaptic; CMS7	c.920T.G [p.Asp307Ala] c.923G.A [p.Pro308Leu]	AD heterozygous	Pyridostigmine	No response	3,4-diaminopyridine	Positive	N/A	N/A	N/A	N/A
72	25625551	2015	Witting, N., Crone, C., Duno, M. and Vissing, J.	Clinical and neurophysiological response to pharmacological treatment of DOK7 congenital myasthenia in an older patient	Clin Neurol Neurosurg		Case report	1	DOK7	Congenital myasthenic syndrome due to defects in docking protein 7 caused by pathogenic variants in DOK7	254300: Myasthenic syndrome, congenital, 10; CMS10	c.1124-1127dupTGCC c.472C>T,p.R158W	AR compound heterozygous	Salbutamol	Positive	3,4-diaminopyridine	Positive	N/A	N/A	N/A	N/A
73	25381298	2014	Shen, X. M., Selcen, D., Brengman, J. and Engel, A. G.	Mutant SNAP25B causes myasthenia, cortical hyperexcitability, ataxia, and intellectual disability	Neurology	OBJECTIVE: To identify and characterize the molecular basis of a syndrome associated with myasthenia, cortical hyperexcitability, cerebellar ataxia, and intellectual disability. METHODS: We performed in vitro microelectrode studies of neuromuscular transmission, performed exome and Sanger sequencing, and analyzed functional consequences of the identified mutation in expression studies. RESULTS: N…	Case report	1	SNAP25B	Congenital myasthenic syndrome due to a synaptosomal-associated protein 25 defect caused by pathogenic variants in SNAP25B	616330: Myasthenic syndrome, congenital, 18; CMS18	p.Ile67Asn (c.200T>A),	AD heterozygous	Pyridostigmine	No response	3,4-diaminopyridine	Positive	levetiracetam	Positive	N/A	N/A
74	26870663	2014	Chaouch, A., Porcelli, V., Cox, D., Edvardson, S., Scarcia, P., De Grassi, A., Pierri, C. L., Cossins, J., Laval, S. H., Griffin, H., Muller, J. S., Evangelista, T., Topf, A., Abicht, A., Huebner, A., von der Hagen, M., Bushby, K., Straub, V., Horvath, R., Elpeleg, O., Palace, J., Senderek, J., Beeson, D., Palmieri, L. and Lochmuller, H.	Mutations in the Mitochondrial Citrate Carrier SLC25A1 are Associated with Impaired Neuromuscular Transmission	J Neuromuscul Dis	BACKGROUND AND OBJECTIVE: Congenital myasthenic syndromes are rare inherited disorders characterized by fatigable weakness caused by malfunction of the neuromuscular junction. We performed whole exome sequencing to unravel the genetic aetiology in an English sib pair with clinical features suggestive of congenital myasthenia. METHODS: We used homozygosity mapping and whole exome sequencing to ide…	Familial case report	2	SLC25A1	Congenital myasthenic syndrome due to a mitochondrial citrate carrier defect caused by pathogenic variants in SLC25A1	N/A	chr.22:19163734 C->T (p.R282H) + chr.22:19165292 C->T (p.G130D)	AR compound heterozygous	Pyridostigmine	Equivocal	3,4-diaminopyridine	Positive	Ephedrine	No response	N/A	N/A
75	25194721	2014	Das, A. S., Agamanolis, D. P. and Cohen, B. H.	Use of next-generation sequencing as a diagnostic tool for congenital myasthenic syndrome	Pediatr Neurol	BACKGROUND: The clinical presentation of congenital myasthenic syndromes is similar to many other neuromuscular disorders of infancy, and with 12 known discrete genetic forms of congenital myasthenic syndromes, both the diagnosis and treatment decisions present clinical challenges. PATIENT DESCRIPTION: We report a 20-month-old boy with rapsyn deficiency. At birth, he presented with a weak cry, hy…	Case report	1	RAPSN	Congenital myasthenic syndrome due to endplate rapsyn deficiency caused by pathogenic variants in RAPSN	616326: Myasthenic syndrome, congenital, 11, associated with acetylcholine receptor deficiency; CMS11	(c.264 C >A + c.1083_1084dupCT)	AR compound heterozygous	Pyridostigmine	Positive	N/A		N/A	N/A	N/A	N/A
76	23292760	2014	Dilena, R., Abicht, A., Sergi, P., Comi, G. P., Di Fonzo, A., Chidini, G., Natacci, F., Barbieri, S. and Lochmuller, H.	Congenital myasthenic syndrome due to choline acetyltransferase mutations in infants: clinical suspicion and comprehensive electrophysiological assessment are important for early diagnosis	J Child Neurol	Congenital myasthenic syndromes are inherited disorders caused by various defects in neuromuscular transmission. Although the typical presentation is fatigable weakness with prominent cranial involvement, neonates can lack these hallmark manifestations, and in those with choline acetyltransferase gene mutations, basal electrophysiological testing can yield negative findings. The authors report th…	Case report	1	CHAT	Congenital myasthenic syndrome due to endplate choline acetyltransferase deficiency caused by pathogenic variants in CHAT	254210: Myasthenic syndrome, congenital, 6, presynaptic; CMS6	1408C>T (R470X) + 1739T>G (F580C)	AR compound heterozygous	Pyridostigmine	Positive	3,4-diaminopyridine	Positive	N/A		N/A
77	24183479	2014	Gallenmuller, C., Muller-Felber, W., Dusl, M., Stucka, R., Guergueltcheva, V., Blaschek, A., von der Hagen, M., Huebner, A., Muller, J. S., Lochmuller, H. and Abicht, A.	Salbutamol-responsive limb-girdle congenital myasthenic syndrome due to a novel missense mutation and heteroallelic deletion in MUSK	Neuromuscul Disord	Congenital myasthenic syndromes (CMS) are clinically and genetically heterogeneous disorders characterized by a neuromuscular transmission defect. In recent years, causative mutations have been identified in atleast 15 genes encoding proteins of the neuromuscular junction. Mutations in MUSK are known as a very rare genetic cause of CMS and have been described in only three families, world-wide. C…	Familial case report	2	MUSK	Congenital myasthenic syndrome due to defects in MuSK caused by pathogenic variants in MUSK	616325: Myasthenic syndrome, congenital, 9, associated with acetylcholine receptor deficiency; CMS9	c.114T > A; p.Asp38Glu	AR homozygous	Pyridostigmine	Negative	Salbutamol	Positive	N/A	N/A	N/A	N/A
78	25033858	2014	Maramattom, B. V., Patil, R. and Thomas, J.	Familial Dok7 congenital myasthenic syndrome responsive to salbutamol	Neurol India		Case report	1	DOK7	Congenital myasthenic syndrome due to defects in docking protein 7 caused by pathogenic variants in DOK7	254300: Myasthenic syndrome, congenital, 10; CMS10	c.1124_1127dupTGCC p.Ala378Serfs*30)	AR homozygous	Pyridostigmine	Equivocal	Salbutamol	Positive	N/A	N/A	N/A	N/A
79	23488891	2014	Maselli, R. A., Arredondo, J., Nguyen, J., Lara, M., Ng, F., Ngo, M., Pham, J. M., Yi, Q., Stajich, J. M., McDonald, K., Hauser, M. A. and Wollmann, R. L.	Exome sequencing detection of two untranslated GFPT1 mutations in a family with limb-girdle myasthenia	Clin Genet	The term 'limb-girdle myasthenia' (LGM) was first used to describe three siblings with proximal limb weakness without oculobulbar involvement, but with EMG decrement and responsiveness to anticholinesterase medication. We report here that exome sequencing in the proband of this family revealed several sequence variations in genes linked to proximal limb weakness. However, the only mutations that …	Familial case report	3	GFPT1	Congenital myasthenic syndrome due to a defect of glycosylation caused by pathogenic variants in GFPT1	610542: Myasthenic syndrome, congenital, 12; CMS12	IVS7-8A>G + c.*22C>A	AR compound heterozygous	Acetylcholinesterase inhibitors	Positive	3,4-diaminopyridine	Positive	N/A	N/A	N/A	N/A
80	24951643	2014	Nicole, S., Chaouch, A., Torbergsen, T., Bauche, S., de Bruyckere, E., Fontenille, M. J., Horn, M. A., van Ghelue, M., Loseth, S., Issop, Y., Cox, D., Muller, J. S., Evangelista, T., Stalberg, E., Ioos, C., Barois, A., Brochier, G., Sternberg, D., Fournier, E., Hantai, D., Abicht, A., Dusl, M., Laval, S. H., Griffin, H., Eymard, B. and Lochmuller, H.	Agrin mutations lead to a congenital myasthenic syndrome with distal muscle weakness and atrophy	Brain	Congenital myasthenic syndromes are a clinically and genetically heterogeneous group of rare diseases resulting from impaired neuromuscular transmission. Their clinical hallmark is fatigable muscle weakness associated with a decremental muscle response to repetitive nerve stimulation and frequently related to postsynaptic defects. Distal myopathies form another clinically and genetically heteroge…	Case series	5	AGRN	Congenital myasthenic syndrome due to agrin deficiency caused by pathogenic variants in AGRN	615120: Myasthenic syndrome, congenital, 8; CMS8	(c.226G>A; p.Gly76Ser) (c.314A>T; p.Asn105Ile) (c.1362dupC; p.Ser455Glnfs*8) (c.2234C>T; p.Ala745Val) (c.5611G>A; p.Gly1871Arg)	AR compound heterozygous	Pyridostigmine	No response	Ephedrine	Positive	Salbutamol	Positive	N/A	N/A
81	24234652	2014	Ohkawara, B., Cabrera-Serrano, M., Nakata, T., Milone, M., Asai, N., Ito, K., Ito, M., Masuda, A., Ito, Y., Engel, A. G. and Ohno, K.	LRP4 third beta-propeller domain mutations cause novel congenital myasthenia by compromising agrin-mediated MuSK signaling in a position-specific manner	Hum Mol Genet	Congenital myasthenic syndromes (CMS) are heterogeneous disorders in which the safety margin of neuromuscular transmission is compromised by one or more specific mechanisms. Using Sanger and exome sequencing in a CMS patient, we identified two heteroallelic mutations, p.Glu1233Lys and p.Arg1277His, in LRP4 coding for the postsynaptic low-density lipoprotein receptor-related protein 4. LRP4, expre…	Case report	1	LRP4	Congenital myasthenic syndrome due to defects in LRP4 caused by pathogenic variants in LRP4	616304: Myasthenic syndrome, congenital, 17; CMS17	p.Glu1233Lys (c.3697G . A) + p.Arg1277His (c.3830G . A).	AR compound heterozygous	Pyridostigmine	Negative	N/A	N/A	N/A	N/A	N/A	N/A
82	24610330	2014	Regal, L., Shen, X. M., Selcen, D., Verhille, C., Meulemans, S., Creemers, J. W. and Engel, A. G.	PREPL deficiency with or without cystinuria causes a novel myasthenic syndrome	Neurology	OBJECTIVE: To investigate the genetic and physiologic basis of the neuromuscular symptoms of hypotonia-cystinuria syndrome (HCS) and isolated PREPL deficiency, and their response to therapy. METHODS: We performed molecular genetic, histochemical, immunoblot, and ultrastructural studies, investigated neuromuscular transmission in vitro in a patient with isolated PREPL deficiency, and evaluated the…	Case series	4	PREPL	Congenital myasthenic syndrome due to pathogenic variants in PREPL that predict reduced filling of synaptic vesicles with ACh	616224: Myasthenic syndrome, congenital, 22; CMS22	c.807delT (p.Met270X) + large deletion	AR compound heterozygous	Pyridostigmine	Equivocal	N/A	N/A	N/A	N/A	N/A	N/A
83	24759841	2014	Selcen, D., Shen, X. M., Brengman, J., Li, Y., Stans, A. A., Wieben, E. and Engel, A. G.	DPAGT1 myasthenia and myopathy: genetic, phenotypic, and expression studies	Neurology	OBJECTIVE: To investigate patients with DPAGT1 (UDP-N-acetylglucosamine-dolichyl-phosphate N-acetylglucosaminephosphotransferase 1)-associated myasthenic syndrome. METHODS: We performed exome and Sanger sequencing, determined glycoprotein expression in patient muscles, assessed pathogenicity of the mutant proteins by examining their expression and enzymatic activity in transfected cells, evaluate…	Familial case report	3	DPAGT1	Congenital myasthenic syndrome due to a defect of glycosylation caused by pathogenic variants in DPAGT1	614750: Myasthenic syndrome, congenital, 13; CMS13	c.1A.C (p.Met1Leu) + c.1123C.T (p.His375Tyr)	AR compound heterozygous	Pyridostigmine	Equivocal	3,4-diaminopyridine	Equivocal	Salbutamol	Positive	N/A	N/A
84	24295813	2014	Webster, R., Liu, W. W., Chaouch, A., Lochmuller, H. and Beeson, D.	Fast-channel congenital myasthenic syndrome with a novel acetylcholine receptor mutation at the alpha-epsilon subunit interface	Neuromuscul Disord	Congenital myasthenic syndromes (CMS) result from the failure to achieve muscle depolarisation due to disorders in the structure and/or function of the neuromuscular synapse. Mutations of the nicotinic acetylcholine receptor (nAChR) form a major subset of CMS. We describe a patient who presented with recurrent apnoeic crises in the neonatal period requiring ventilator support. Electromyography re…	Case report	1	CHRNE	Fast-channel congenital myasthenic syndrome due to an acetylcholine receptor defect caused by pathogenic variants in CHRNE	616324: Myasthenic syndrome, congenital, 4b, fast-channel; CMS4b	c.43T>C, p.εTyr15His (εY15H), c.113C>A, p.εThr38Lys (εT38K)	AR compound heterozygous	Pyridostigmine	Positive	Salbutamol	Positive	N/A	N/A	N/A	N/A
85	23794683	2013	Selcen, D., Shen, X. M., Milone, M., Brengman, J., Ohno, K., Deymeer, F., Finkel, R., Rowin, J. and Engel, A. G.	GFPT1-myasthenia: clinical, structural, and electrophysiologic heterogeneity	Neurology	OBJECTIVE: To identify patients with GFPT1-related limb-girdle myasthenia and analyze phenotypic consequences of the mutations. METHODS: We performed genetic analysis, histochemical, immunoblot, and ultrastructural studies and in vitro electrophysiologic analysis of neuromuscular transmission. RESULTS: We identified 16 recessive mutations in GFPT1 in 11 patients, of which 12 are novel. Ten patien…	Case series	11	GFPT1	Congenital myasthenic syndrome due to a defect of glycosylation caused by pathogenic variants in GFPT1	610542: Myasthenic syndrome, congenital, 12; CMS12	i. c.1700-1716dup17; Gly573LeufsX9 ii. c.*22C.Ab i. c.1634 G>C; p.Arg545Pro ii. c.*22C.Ab i. c.606-8A>G ii. c.*22C.Ab i. c.338A>G; p.Asp113Gly ii. c.1475T.C; p.Met492Thr i. c.49C>T; p.Arg17X ii. c.*22C.Ab i. c.686-2A>Gc ii. c.910C>T; p.Arg304X i., ii. c.331C.T; p.Arg111Cys, x2 i. c.1049C>T; p.Thr350Ile ii. c.1337delA; p.Ile446SerfsX41 i. c.1_2del2; p.Met1fsX2 ii. c.44C.T; p.Thr15Met i., ii. c.200…	AR compound heterozygous	Pyridostigmine	Partial	3,4-diaminopyridine	Positive	Salbutamol	Positive	N/A	N/A
86	23591138	2013	Basiri, K., Belaya, K., Liu, W. W., Maxwell, S., Sedghi, M. and Beeson, D.	Clinical features in a large Iranian family with a limb-girdle congenital myasthenic syndrome due to a mutation in DPAGT1	Neuromuscul Disord	Mutations in DPAGT1 are a newly recognised cause of congenital myasthenic syndrome. DPAGT1 encodes an early component of the N-linked glycosylation pathway. Initially mutations in DPAGT1 have been associated with the onset of the severe multisystem disorder - congenital disorder of glycosylation type 1J. However, recently it was established that certain mutations in this gene can cause symptoms r…	Familial case report	4	DPAGT1	Congenital myasthenic syndrome due to a defect of glycosylation caused by pathogenic variants in DPAGT1	614750: Myasthenic syndrome, congenital, 13; CMS13	c.652C>T,p.Arg218Trp.	AR compound heterozygous	Pyridostigmine	Positive	N/A		N/A	N/A	N/A	N/A
87	23326516	2013	Ben Ammar, A., Soltanzadeh, P., Bauche, S., Richard, P., Goillot, E., Herbst, R., Gaudon, K., Huze, C., Schaeffer, L., Yamanashi, Y., Higuchi, O., Taly, A., Koenig, J., Leroy, J. P., Hentati, F., Najmabadi, H., Kahrizi, K., Ilkhani, M., Fardeau, M., Eymard, B. and Hantai, D.	A mutation causes MuSK reduced sensitivity to agrin and congenital myasthenia	PLoS One	Congenital myasthenic syndromes (CMSs) are a heterogeneous group of genetic disorders affecting neuromuscular transmission. The agrin/muscle-specific kinase (MuSK) pathway is critical for proper development and maintenance of the neuromuscular junction (NMJ). We report here an Iranian patient in whom CMS was diagnosed since he presented with congenital and fluctuating bilateral symmetric ptosis, …	Case report	1	MUSK	Congenital myasthenic syndrome due to defects in MuSK caused by pathogenic variants in MUSK	616325: Myasthenic syndrome, congenital, 9, associated with acetylcholine receptor deficiency; CMS9	c.2503A>G, p.Met835Val	AR compound heterozygous	Pyridostigmine	No response	N/A	N/A	N/A	N/A	N/A	N/A
88	23219351	2013	Burke, G., Hiscock, A., Klein, A., Niks, E. H., Main, M., Manzur, A. Y., Ng, J., de Vile, C., Muntoni, F., Beeson, D. and Robb, S.	Salbutamol benefits children with congenital myasthenic syndrome due to DOK7 mutations	Neuromuscul Disord	Congenital myasthenic syndromes due to DOK7 mutations cause fatigable limb girdle weakness. Treatment with ephedrine improves muscle strength. Salbutamol, a beta(2)-adrenergic receptor agonist with fewer side effects and more readily available, has been effective in adult and anecdotal childhood cases. This study reports the effects of salbutamol on motor function in childhood DOK7 congenital mya…	Open-label trial	9	DOK7	Congenital myasthenic syndrome due to defects in docking protein 7 caused by pathogenic variants in DOK7	254300: Myasthenic syndrome, congenital, 10; CMS10	c.325G>T c.596delT c.101–24_141del: 176_206delinsAG c.1124_1127dupTGCC c.101–24_141del: 176_206delinsAG c.1124_1127dupTGCC c.415G>C c.415G>C c.1124_1127dupTGCC c.513C>T c.1124_1127dupTGCC c.533–37_c.533–11del27 c.1124_1127dupTGCC c.512G>A c.54+25_39del15intron1 c.1263delC c.601.C>T c.1142_1127dupTGCC	AR homozygous and compound heterozygous	Salbutamol	Positive	N/A	N/A	N/A	N/A	N/A	N/A
89	23404334	2013	Cossins, J., Belaya, K., Hicks, D., Salih, M. A., Finlayson, S., Carboni, N., Liu, W. W., Maxwell, S., Zoltowska, K., Farsani, G. T., Laval, S., Seidhamed, M. Z., Donnelly, P., Bentley, D., McGowan, S. J., Muller, J., Palace, J., Lochmuller, H. and Beeson, D.	Congenital myasthenic syndromes due to mutations in ALG2 and ALG14	Brain	Congenital myasthenic syndromes are a heterogeneous group of inherited disorders that arise from impaired signal transmission at the neuromuscular synapse. They are characterized by fatigable muscle weakness. We performed linkage analysis, whole-exome and whole-genome sequencing to determine the underlying defect in patients with an inherited limb-girdle pattern of myasthenic weakness. We identif…	Case series	2	ALG14	Congenital myasthenic syndrome due to a defect of glycosylation caused by pathogenic variants in ALG14	616227: Myasthenic syndrome, congenital, 15; CMS15,	c.194C>T (p.Pro65Leu) and c.310C>T (p.Arg104*)	AR compound heterozygous	Pyridostigmine	Positive	N/A	N/A	N/A	N/A	N/A	N/A
								5	ALG2	Congenital myasthenic syndrome due to a defect of glycosylation caused by pathogenic variants in ALG2	616228: Myasthenic syndrome, congenital, 14; CMS14	c.214_226delinsAGTCCCCGGC, p.72_75delinsSPR c.203 T4G (p.Val68Gly)	AR compound heterozygous	Pyridostigmine	Positive	N/A	N/A	N/A	N/A	N/A	N/A
90	23371844	2013	Duran, G. S., Uzunhan, T. A., Ekici, B., Citak, A., Aydinli, N. and Caliskan, M.	Severe scoliosis in a patient with COLQ mutation and congenital myasthenic syndrome: a clue for diagnosis	Acta Neurol Belg		Case report	1	COLQ	Congenital myasthenic syndrome due to endplate acetylcholinesterase deficiency caused by pathogenic variants in COLQ	603034: Myasthenic syndrome, congenital, 5; CMS5	c.1082delC (p.P361Lfs*64)	AR homozygous	Salbutamol	Positive	Ephedrine	Positive	N/A	N/A	N/A	N/A
91	23447650	2013	Finlayson, S., Palace, J., Belaya, K., Walls, T. J., Norwood, F., Burke, G., Holton, J. L., Pascual-Pascual, S. I., Cossins, J. and Beeson, D.	Clinical features of congenital myasthenic syndrome due to mutations in DPAGT1	J Neurol Neurosurg Psychiatry	BACKGROUND: A newly defined congenital myasthenic syndrome (CMS) caused by DPAGT1 mutations has recently been reported. While many other CMS-associated proteins have discrete roles localised to the neuromuscular junction, DPAGT1 is ubiquitously expressed, modifying many proteins, and as such is an unexpected cause of isolated neuromuscular involvement. METHODS: We present detailed clinical charac…	Case series	5	DPAGT1	Congenital myasthenic syndrome due to a defect of glycosylation caused by pathogenic variants in DPAGT1	614750: Myasthenic syndrome, congenital, 13; CMS13	c.324G>C ( p.Met108Ile) c.349G>A (p.Val117Ile) c.349G>A (p.Val117Ile) c.699dup (p.Thr234Hisfs*116) c.478G>A ( p.Gly160Ser) c.574G>A (p.Gly192Ser) c.358C>A ( p.Leu120Met) c.791T>G ( p.Val264Gly) c.358C>A ( p.Leu120Met) c.791T>G ( p.Val264Gly)	AR compound heterozygous	Pyridostigmine	Positive	3,4-diaminopyridine	Positive	Salbutamol	Positive	N/A	N/A
92	23281026	2013	Finlayson, S., Spillane, J., Kullmann, D. M., Howard, R., Webster, R., Palace, J. and Beeson, D.	Slow channel congenital myasthenic syndrome responsive to a combination of fluoxetine and salbutamol	Muscle Nerve	INTRODUCTION: Slow channel congenital myasthenic syndrome is a dominant disorder characterized by prolonged acetylcholine receptor ion-channel activation. METHODS: Molecular genetic techniques, electrophysiology, and binding studies in human embryonic kidney (HEK) 293 cells determined mutant function and expression levels. Patient response to treatment was measured by quantitative myasthenic grav…	Case report	1	CHRNE	Slow-channel congenital myasthenic syndrome due to an acetylcholine receptor defect caused by a pathogenic variant in CHRNE	605809: Myasthenic syndrome, congenital, 4a, slow-channel; CMS4a	c.833_835delCTC, p.εS278del + c.650G>T, p.εR217L	AR compound heterozygous	Fluoxetine	Positive	Salbutamol	Positive	Neostigmine	Positive	N/A	N/A
93	23831158	2013	Klein, A., Pitt, M. C., McHugh, J. C., Niks, E. H., Sewry, C. A., Phadke, R., Feng, L., Manzur, A. Y., Tirupathi, S., Devile, C., Jayawant, S., Finlayson, S., Palace, J., Muntoni, F., Beeson, D. and Robb, S. A.	DOK7 congenital myasthenic syndrome in childhood: early diagnostic clues in 23 children	Neuromuscul Disord	Mutations in DOK7 are a common cause of congenital myasthenia. Treatment with ephedrine or salbutamol is effective, but diagnosis is often delayed. The aim of our study was to find early clues to the diagnosis of DOK7 congenital myasthenic syndrome. We included 23 children of 20 families. Onset of symptoms ranged from birth to age 3 years. 13 presented at birth with feeding difficulties, 11 with …	Case series	23*	DOK7	Congenital myasthenic syndrome due to defects in docking protein 7 caused by pathogenic variants in DOK7	254300: Myasthenic syndrome, congenital, 10; CMS10	c.1124_1127dupTGCC; (p.Ala378fs) c.1339_1342dupCTGG; (p.Gly448fs) c.1124_1127dupTGCC; (p.Ala378fs) c.325G>T; (p.Gly109Cys) c.1124_1127dupTGCC; (p.Ala378fs) c.1124_1127dupTGCC; (p.Ala378fs) c.1124_1127dupTGCC; (p.Ala378fs) c.1124_1127dupTGCC; (p.Ala378fs) c.415G>C; (p.Va1139Leu) c.1124_1127dupTGCC; (p.Ala378fs) c.1124_1127dupTGCC; (p.Ala378fs) c.1143deIC (p.Glu 382fs) c.1124_1127dupTGCC; (p.Ala378…	AR homozygous and compound heterozygous	Pyridostigmine	Equivocal	Salbutamol	Positive	Ephedrine	Positive	N/A	N/A
94	23790237	2013	Lorenzoni, P. J., Scola, R. H., Kay, C. S., Filla, L., Miranda, A. P., Pinheiro, J. M., Chaouch, A., Lochmuller, H. and Werneck, L. C.	Salbutamol therapy in congenital myasthenic syndrome due to DOK7 mutation	J Neurol Sci	INTRODUCTION: Salbutamol is a selective B2-adrenergic agonist, which has previously been described to be associated with partial improvement of myasthenia gravis and congenital myasthenic syndromes (CMS). In this study, we analyzed the effect of salbutamol in five patients with Dok-7 CMS. METHODS: We studied 5 patients (2 male and 3 female), with a mean age of 27+/-11.06 years, who harbored c.112…	Open-label trial	5	DOK7	Congenital myasthenic syndrome due to defects in docking protein 7 caused by pathogenic variants in DOK7	254300: Myasthenic syndrome, congenital, 10; CMS10	c.1124_1127dupTGCC p.G64R p.S45L	AR homozygous and compound heterozygous	Salbutamol	Positive	N/A	N/A	N/A	N/A	N/A	N/A
95	23657916	2013	Lorenzoni, P. J., Scola, R. H., Kay, C. S., Lochmuller, H. and Werneck, L. C.	Congenital myasthenic syndrome and minicore-like myopathy with DOK7 mutation	Muscle Nerve		Case report	1	DOK7	Congenital myasthenic syndrome due to defects in docking protein 7 caused by pathogenic variants in DOK7	254300: Myasthenic syndrome, congenital, 10; CMS10	S45L/1124_1127dupTGCC	AR compound heterozygous	Pyridostigmine	No response	Salbutamol	Positive	N/A	N/A	N/A	N/A
96	24122059	2013	Maggi, L., Brugnoni, R., Scaioli, V., Winden, T. L., Morandi, L., Engel, A. G., Mantegazza, R. and Bernasconi, P.	Marked phenotypic variability in two siblings with congenital myasthenic syndrome due to mutations in MUSK	J Neurol		Familial case report	1	MUSK	Congenital myasthenic syndrome due to defects in MuSK caused by pathogenic variants in MUSK	616325: Myasthenic syndrome, congenital, 9, associated with acetylcholine receptor deficiency; CMS9	c.2368G>A (p.Val790Met) c.467delA (p.Lys156Argfs*20)	AR compound heterozygous	Pyridostigmine	Negative	N/A	N/A	N/A	N/A	N/A	N/A
97	22884442	2013	Mahjneh, I., Lochmuller, H., Muntoni, F. and Abicht, A.	DOK7 limb-girdle myasthenic syndrome mimicking congenital muscular dystrophy	Neuromuscul Disord	Congenital myasthenic syndrome shows a wide clinical heterogeneity. However, the unusual pattern of muscle weakness and the presence of variable degree of muscle pathology, subtle electrophysiological abnormalities and lack of circadian variability of symptoms may complicate its recognition. We have previously reported a Palestinian family with suspected congenital muscular dystrophy and linkage …	Case series	6	DOK7	Congenital myasthenic syndrome due to defects in docking protein 7 caused by pathogenic variants in DOK7	254300: Myasthenic syndrome, congenital, 10; CMS10	c.957delC	AR homozygous	Salbutamol	Positive	N/A	N/A	N/A	N/A	N/A	N/A
98	23365176	2013	Pavone, P., Pratico, A. D., Pavone, V. and Falsaperla, R.	Congenital familial myasthenic syndromes: disease and course in an affected dizygotic twin pair	BMJ Case Rep	The present report describes clinical variability in an affected dizygotic twin pair. Twin 1 showed classical features of the congenital myasthenic syndromes (CMS), that is, ptosis, dysphonia, asthenia and hypotonia. In twin 2, these clinical signs were less pronounced, but subtle resulting in severe lumbar hyperlordosis. Molecular analysis, performed for both twins, revealed the presence of thre…	Familial case report	2	RAPSN	Congenital myasthenic syndrome due to endplate rapsyn deficiency caused by pathogenic variants in RAPSN	616326: Myasthenic syndrome, congenital, 11, associated with acetylcholine receptor deficiency; CMS11	c.456t>C (pY152Y) in exon 2; c.1143T>C (p.P81P) in exon 7 and IVS3-11delC in intron 3	AR compound heterozygous	Pyridostigmine	Positive	N/A	N/A	N/A	N/A	N/A	N/A
99	23688972	2013	Peyer, A. K., Abicht, A., Heinimann, K., Sinnreich, M. and Fischer, D.	Quinine sulfate as a therapeutic option in a patient with slow channel congenital myasthenic syndrome	Neuromuscul Disord	Slow channel congenital myasthenic syndrome is caused by a genetically determined kinetic anomaly of the acetylcholine receptor at the neuromuscular junction leading to its prolonged open state. Patients typically present with fatigability and static weakness of neck, hand and finger extensors. The open-channel blockers fluoxetine and quinidine have been used as standard treatment, although the f…	Case report	1	CHRNA1	Slow-channel congenital myasthenic syndrome due to an acetylcholine receptor defect caused by a pathogenic variant in CHRNA1	601462: Myasthenic syndrome, congenital, 1a, slow-channel; CMS1a	c.959G>T (p.Gly320Val)	AD heterozygous	Fluoxetine	Positive	Quinine sulfate	Positive	N/A	N/A	N/A	N/A
100	23569079	2013	Zoltowska, K., Webster, R., Finlayson, S., Maxwell, S., Cossins, J., Muller, J., Lochmuller, H. and Beeson, D.	Mutations in GFPT1 that underlie limb-girdle congenital myasthenic syndrome result in reduced cell-surface expression of muscle AChR	Hum Mol Genet	Mutations in GFPT1 underlie a congenital myasthenic syndrome (CMS) characterized by a limb-girdle pattern of muscle weakness. Glutamine-fructose-6-phosphate transaminase 1 (GFPT1) is a key rate-limiting enzyme in the hexosamine biosynthetic pathway providing building blocks for the glycosylation of proteins and lipids. It is expressed ubiquitously and it is not readily apparent why mutations in t…	Case series	2	GFPT1	Congenital myasthenic syndrome due to a defect of glycosylation caused by pathogenic variants in GFPT1	610542: Myasthenic syndrome, congenital, 12; CMS12	c.1154G.A, c.1301G.A, p.R385H/R434H c.44C.T, c.1486C.T p.T15M/R496W	AR compound heterozygous	Pyridostigmine	Positive	3,4-diaminopyridine	Positive	N/A	N/A	N/A	N/A
101	22742743	2012	Belaya, K., Finlayson, S., Slater, C. R., Cossins, J., Liu, W. W., Maxwell, S., McGowan, S. J., Maslau, S., Twigg, S. R., Walls, T. J., Pascual Pascual, S. I., Palace, J. and Beeson, D.	Mutations in DPAGT1 cause a limb-girdle congenital myasthenic syndrome with tubular aggregates	Am J Hum Genet	Congenital myasthenic syndromes are a heterogeneous group of inherited disorders that arise from impaired signal transmission at the neuromuscular synapse. They are characterized by fatigable muscle weakness. We performed whole-exome sequencing to determine the underlying defect in a group of individuals with an inherited limb-girdle pattern of myasthenic weakness. We identify DPAGT1 as a gene in…	Case series	5	DPAGT1	Congenital myasthenic syndrome due to a defect of glycosylation caused by pathogenic variants in DPAGT1	614750: Myasthenic syndrome, congenital, 13; CMS13	c.324G>C (p.Met108Ile) + c.349G>A (p.Val117Ile) c.699dup (p.Thr234Hisfs*116) + c.349G>A (p.Val117Ile). c.358C>A (p.Leu120Met) + c.791T>G(p.Val264Gly) c.478G>A (p.Gly160Ser) + c.574G>A (p.Gly192Ser)	AR compound heterozygous	Pyridostigmine	Positive	3,4-diaminopyridine	Positive	Salbutamol	Positive	N/A	N/A
102	22759693	2012	Chan, S. H., Wong, V. C. and Engel, A. G.	Neuromuscular junction acetylcholinesterase deficiency responsive to albuterol	Pediatr Neurol	Congenital myasthenic syndrome caused by endplate acetylcholinesterase deficiency constitutes a rare autosomal recessive disease. We describe a child with early-onset ptosis, complete ophthalmoplegia, facial and proximal muscle weakness, easy fatigability, a decremental electromyographic response, and a repetitive compound muscle action potential not improved by anti-acetylcholinesterase medicati…	Case report	1	COLQ	Congenital myasthenic syndrome due to endplate acetylcholinesterase deficiency caused by pathogenic variants in COLQ	603034: Myasthenic syndrome, congenital, 5; CMS5	IVS15+1G > A + IVS2-1G > A	AR compound heterozygous	Salbutamol	Positive	N/A	N/A	N/A	N/A	N/A	N/A
103	21822932	2012	Chaouch, A., Muller, J. S., Guergueltcheva, V., Dusl, M., Schara, U., Rakocevic-Stojanovic, V., Lindberg, C., Scola, R. H., Werneck, L. C., Colomer, J., Nascimento, A., Vilchez, J. J., Muelas, N., Argov, Z., Abicht, A. and Lochmuller, H.	A retrospective clinical study of the treatment of slow-channel congenital myasthenic syndrome	J Neurol	Slow-channel congenital myasthenic syndrome (CMS) is a rare subtype of CMS caused by dominant "gain of function" mutations in the acetylcholine receptor. Clinically, the cervical and forearm extensor muscles seem to be preferentially weaker; and conventional treatment with anticholinesterases fails to improve symptoms. In contrast, open channel blockers such as fluoxetine and quinidine have been …	Case series	3	CHRNA1	Slow-channel congenital myasthenic syndrome due to an acetylcholine receptor defect caused by a pathogenic variant in CHRNA1	601462: Myasthenic syndrome, congenital, 1a, slow-channel; CMS1a	G153S	AD heterozygous	Pyridostigmine	No response	3,4-diaminopyridine	No response	Quinidine	Positive	Fluoxetine	Positive
								3	CHRNB1	Slow-channel congenital myasthenic syndrome due to an acetylcholine receptor defect caused by a pathogenic variant in CHRNB1	616313: Myasthenic syndrome, congenital, 2a, slow-channel; CMS2a	V266M T265S	AD heterozygous	Pyridostigmine	No response	3,4-diaminopyridine	No response	Quinidine	Positive	Fluoxetine	Positive
								1	CHRND	Slow-channel congenital myasthenic syndrome due to an acetylcholine receptor defect caused by a pathogenic variant in CHRND	616321: Myasthenic syndrome, congenital, 3a, slow-channel; CMS3a	S268Y	AD heterozygous	Pyridostigmine	No response	3,4-diaminopyridine	No response	Quinidine	Positive	Fluoxetine	Positive
								5	CHRNE	Slow-channel congenital myasthenic syndrome due to an acetylcholine receptor defect caused by a pathogenic variant in CHRNE	605809: Myasthenic syndrome, congenital, 4a, slow-channel; CMS4a	V259L L269F	AD heterozygous	Pyridostigmine	No response	3,4-diaminopyridine	No response	Quinidine	Positive	Fluoxetine	Positive
104	21975507	2012	Guergueltcheva, V., Muller, J. S., Dusl, M., Senderek, J., Oldfors, A., Lindbergh, C., Maxwell, S., Colomer, J., Mallebrera, C. J., Nascimento, A., Vilchez, J. J., Muelas, N., Kirschner, J., Nafissi, S., Kariminejad, A., Nilipour, Y., Bozorgmehr, B., Najmabadi, H., Rodolico, C., Sieb, J. P., Schlotter, B., Schoser, B., Herrmann, R., Voit, T., Steinlein, O. K., Najafi, A., Urtizberea, A., Soler, D…	Congenital myasthenic syndrome with tubular aggregates caused by GFPT1 mutations	J Neurol	Congenital myasthenic syndrome (CMS) is a clinically and genetically heterogeneous group of inherited disorders of the neuromuscular junction. A difficult to diagnose subgroup of CMS is characterised by proximal muscle weakness and fatigue while ocular and facial involvement is only minimal. DOK7 mutations have been identified as causing the disorder in about half of the cases. More recently, usi…	Case series	24	GFPT1	Congenital myasthenic syndrome due to a defect of glycosylation caused by pathogenic variants in GFPT1	610542: Myasthenic syndrome, congenital, 12; CMS12	p.D348Y p.W240X p.R111C p.M492T + c.*22C>A p.D43V + p.I121T p.R385H + p.R434H p.T15M and p.R496W p.V199F and c.*22>A p.R512W p.M491T c.1278_1281dup + c.*22C>A p.T15A + c.621_622del p.222_223insA + p.R111C p.M491T + c.714_715insA	AR compound heterozygous	Pyridostigmine	Positive	3,4-diaminopyridine	Positive	N/A	N/A	N/A	N/A
105	22490774	2012	Guven, A., Demirci, M. and Anlar, B.	Recurrent COLQ mutation in congenital myasthenic syndrome	Pediatr Neurol	Congenital myasthenic syndromes comprise clinically and genetically heterogeneous disorders resulting from presynaptic, synaptic, or postsynaptic defects. Mutations in the COLQ gene result in acetylcholinesterase deficiency and cause a rare, autosomal recessive synaptic form of congenital myasthenic syndrome, with variable age of onset and clinical severity. We present four unrelated patients wit…	Case series	4	COLQ	Congenital myasthenic syndrome due to endplate acetylcholinesterase deficiency caused by pathogenic variants in COLQ	603034: Myasthenic syndrome, congenital, 5; CMS5	W148X	AR homozygous	Pyridostigmine	No response	3,4-diaminopyridine	Equivocal/positive	Salbutamol		N/A	N/A
106	22987706	2012	Huh, S. Y., Kim, H. S., Jang, H. J., Park, Y. E. and Kim, D. S.	Limb-girdle myasthenia with tubular aggregates associated with novel GFPT1 mutations	Muscle Nerve	INTRODUCTION: Limb-girdle myasthenia with tubular aggregates (LGM with TAs) is a subtype of congenital myasthenic syndrome caused by recessive mutations of glutamine-fructose-6-phosphate transaminase 1 (GFPT1). METHODS: Clinical and neurophysiological assessment was made in a Korean boy who had proximal limb muscle weakness. Findings suggested a diagnosis of congenital myasthenic syndrome. RESULT…	Case report	1	GFPT1	Congenital myasthenic syndrome due to a defect of glycosylation caused by pathogenic variants in GFPT1	610542: Myasthenic syndrome, congenital, 12; CMS12	p.E256Q + p.M499T	AR compound heterozygous	Pyridostigmine	Positive	N/A	N/A	N/A	N/A	N/A	N/A
107	22326364	2012	Leshinsky-Silver, E., Shapira, D., Yosovitz, K., Ginsberg, M., Lerman-Sagie, T. and Lev, D.	A novel mutation in the TPR6 domain of the RAPSN gene associated with congenital myasthenic syndrome	J Neurol Sci	Congenital myasthenic syndromes (CMS) are rare genetic disorders characterized by impaired neuromuscular transmission. They are caused by mutations in synaptic, presynaptic and post synaptic proteins. Rapsyn is a postsynaptic peripheral membrane protein that anchors the nicotinic acetylcholine receptor to the motor endplate. CMS patients of Iraqi and Persian Jewish origin, carry a common founder …	Familial case report	2	RAPSN	Congenital myasthenic syndrome due to endplate rapsyn deficiency caused by pathogenic variants in RAPSN	616326: Myasthenic syndrome, congenital, 11, associated with acetylcholine receptor deficiency; CMS11	- 38A-G + c.673–676 insACT	AR compound heterozygous	Pyridostigmine	Positive	N/A	N/A	N/A	N/A	N/A	N/A
108	22205389	2012	Maselli, R. A., Fernandez, J. M., Arredondo, J., Navarro, C., Ngo, M., Beeson, D., Cagney, O., Williams, D. C., Wollmann, R. L., Yarov-Yarovoy, V. and Ferns, M. J.	LG2 agrin mutation causing severe congenital myasthenic syndrome mimics functional characteristics of non-neural (z-) agrin	Hum Genet	We describe a severe form of congenital myasthenic syndrome (CMS) caused by two heteroallelic mutations: a nonsense and a missense mutation in the gene encoding agrin (AGRN). The identified mutations, Q353X and V1727F, are located at the N-terminal and at the second laminin G-like (LG2) domain of agrin, respectively. A motor-point muscle biopsy demonstrated severe disruption of the architecture o…	Case report	1	AGRN	Congenital myasthenic syndrome due to agrin deficiency caused by pathogenic variants in AGRN	615120: Myasthenic syndrome, congenital, 8; CMS8	Q353X + V1727F	AR compound heterozygous	Pyridostigmine	Positive	3,4-diaminopyridine	No response	Ephedrine	No response	N/A	N/A
109	21940170	2012	Palace, J., Lashley, D., Bailey, S., Jayawant, S., Carr, A., McConville, J., Robb, S. and Beeson, D.	Clinical features in a series of fast channel congenital myasthenia syndrome	Neuromuscul Disord	Fast channel congenital myasthenic syndromes are rare, but frequently result in severe weakness. We report a case of 12 fast channel patients to highlight clinical features and management difficulties. Patients were diagnosed through genetic screening and identification of mutations shown to cause fast channel syndrome. Data was obtained from clinical notes, history, examination and follow up. Pa…	Case series	12	CHRNE	Fast-channel congenital myasthenic syndrome due to an acetylcholine receptor defect caused by pathogenic variants in CHRNE	616324: Myasthenic syndrome, congenital, 4b, fast-channel; CMS4b	εP121L+εP121L εP121L+εY15H εP121L+εS143L εP121L+εP245L εP121L+ε553del7	AR homozygous and compound heterozygous	Pyridostigmine	Positive	3,4-diaminopyridine	Positive	Ephedrine	Equivocal	N/A	N/A
								1	CHRND	Fast-channel congenital myasthenic syndrome due to an acetylcholine receptor defect caused by pathogenic variants in CHRND	616322: Myasthenic syndrome, congenital, 3b, fast-channel; CMS3b	δE59K+δ756del2	AR compound heterozygous	Pyridostigmine	Positive	N/A	N/A	N/A	N/A	N/A	N/A
110	22592360	2012	Shen, X. M., Brengman, J. M., Edvardson, S., Sine, S. M. and Engel, A. G.	Highly fatal fast-channel syndrome caused by AChR epsilon subunit mutation at the agonist binding site	Neurology	OBJECTIVE: To characterize the molecular basis of a novel fast-channel congenital myasthenic syndrome. METHODS: We used the candidate gene approach to identify the pathogenic mutation in the acetylcholine receptor (AChR) epsilon subunit, genetically engineered the mutant AChR into HEK cells, and evaluated the level of expression and kinetic properties of the mutant receptor. RESULTS: An 8-year-ol…	Case report	1	CHRNE	Fast-channel congenital myasthenic syndrome due to an acetylcholine receptor defect caused by pathogenic variants in CHRNE	616324: Myasthenic syndrome, congenital, 4b, fast-channel; CMS4b	NM_000080.3 p.W55R (c.163T>C)	AR homozygous	Pyridostigmine	Positive	N/A	N/A	N/A	N/A	N/A	N/A
111	22728938	2012	Shen, X. M., Brengman, J. M., Sine, S. M. and Engel, A. G.	Myasthenic syndrome AChRalpha C-loop mutant disrupts initiation of channel gating	J Clin Invest	Congenital myasthenic syndromes (CMSs) are neuromuscular disorders that can be caused by defects in ace-tylcholine receptor (AChR) function. Disease-associated point mutants can reveal the unsuspected functional significance of mutated residues. We identified two pathogenic mutations in the extracellular domain of the AChR alpha subunit (AChRalpha) in a patient with myasthenic symptoms since birt…	Case report	1	CHRNA1	Fast-channel congenital myasthenic syndrome due to an acetylcholine receptor defect caused by pathogenic variants in CHRNA1	608930: Myasthenic syndrome, congenital, 1b, fast-channel; CMS1b	V188M + G74C	AR compound heterozygous	Pyridostigmine	Positive	N/A	N/A	N/A	N/A	N/A	N/A
112	22088788	2012	Wargon, I., Richard, P., Kuntzer, T., Sternberg, D., Nafissi, S., Gaudon, K., Lebail, A., Bauche, S., Hantai, D., Fournier, E., Eymard, B. and Stojkovic, T.	Long-term follow-up of patients with congenital myasthenic syndrome caused by COLQ mutations	Neuromuscul Disord	Congenital myasthenic syndromes (CMS) are clinically and genetically heterogeneous inherited disorders characterized by impaired neuromuscular transmission. Mutations in the acetylcholinesterase (AChE) collagen-like tail subunit gene (COlQ) cause recessive forms of synaptic CMS with end plate AChE deficiency. We present data on 15 COLQ -mutant CMS carrying 16 different mutations (9 novel ones ide…	Case series	15	COLQ	Congenital myasthenic syndrome due to endplate acetylcholinesterase deficiency caused by pathogenic variants in COLQ	603034: Myasthenic syndrome, congenital, 5; CMS5	c.107 1G>A/p.Arg236X (c.706C>T). p.Cys427Cys (c.1281C>T) Homozygote p.Tyr430Ser (c.1289A>C) Homozygote c.107–1G>A c.788insC p.Tyr430Ser (c.1289A>C) p.Cys427Cys (c.1281C>T) p.Ile446Thr (c.1337T>C) c.1082delC c.157dup Homozygote p.Pro59Ser (c.175C>T) p.Cys451Ser (c.1351T>A) p.Arg227X (c.679C>T) Homozygote p.Trp148X (c.444G > A) Homozygote p.Tyr430Ser (c.1289A>C). Homozygote p.Arg410Trp (c.1228C>T) …	AR homozygous and compound heterozygous	Acetylcholinesterase inhibitors	Negative	3,4-diaminopyridine	Equivocal	Ephedrine	Positive	Fluoxetine	Positive
113	22382357	2012	Webster, R., Maxwell, S., Spearman, H., Tai, K., Beckstein, O., Sansom, M. and Beeson, D.	A novel congenital myasthenic syndrome due to decreased acetylcholine receptor ion-channel conductance	Brain	Muscle acetylcholine receptor ion channels mediate neurotransmission by depolarizing the postsynaptic membrane at the neuromuscular junction. Inherited disorders of neuromuscular transmission, termed congenital myasthenic syndromes, are commonly caused by mutations in genes encoding the five subunits of the acetylcholine receptor that severely reduce endplate acetylcholine receptor numbers and/or…	Case report	1	CHRNE	Congenital myasthenic syndrome with kinetic defect due to reduced ion channel conductance caused by pathogenic variants in CHRNE	N/A	c.845C>G, p.εP282R c.798_800delCTT,p.εΔF266	AR compound heterozygous	Pyridostigmine	Positive	3,4-diaminopyridine	No response	N/A	N/A	N/A	N/A
114	21372719	2011	Gentili, A., Ansaloni, S., Morello, W., Cecini, M. T., Cordelli, D. M. and Baroncini, S.	Diagnosis of congenital myasthenic syndrome with mutation of the RAPSN gene after general anaesthesia	Eur J Anaesthesiol		Case report	1	RAPSN	Congenital myasthenic syndrome due to endplate rapsyn deficiency caused by pathogenic variants in RAPSN	616326: Myasthenic syndrome, congenital, 11, associated with acetylcholine receptor deficiency; CMS11	N88K	AR homozygous	Pyridostigmine	Positive	N/A	N/A	N/A	N/A	N/A	N/A
115	22408661	2011	Khan, A., Hussain, N. and Gosalakkal, J. A.	Bulbar dysfunction: An early presentation of congenital myasthenic syndrome in three infants	J Pediatr Neurosci	Congenital myasthenic syndromes are a group of rare genetic disorders affecting neuromuscular transmission. A high index of suspicion is required as clinical manifestations can be variable and nonspecific. Clinical phenotype includes arthrogryposis, respiratory crises, facial deformities, and weakness. With the availability of molecular genetics, this group of conditions can now be more clearly d…	Case report	1	RAPSN	Congenital myasthenic syndrome due to endplate rapsyn deficiency caused by pathogenic variants in RAPSN	616326: Myasthenic syndrome, congenital, 11, associated with acetylcholine receptor deficiency; CMS11	N88K/deletion	AR compound heterozygous	Neostigmine	Positive	3,4-diaminopyridine	Positive	N/A	N/A	N/A	N/A
							Familial case report	2	CHRNE	Congenital myasthenic syndrome due to primary acetylcholine receptor deficiency caused by pathogenic variants in CHRNE	608931: Myasthenic syndrome, congenital, 4c, associated with acetylcholine receptor deficiency; CMS4c	c.554_560del	AR homozygous	Neostigmine	Positive	Ephedrine	Positive	N/A	N/A	N/A	N/A
116	21952943	2011	Liewluck, T., Selcen, D. and Engel, A. G.	Beneficial effects of albuterol in congenital endplate acetylcholinesterase deficiency and Dok-7 myasthenia	Muscle Nerve	INTRODUCTION: Congenital myasthenic syndromes (CMS) are disabling but treatable disorders. Anticholinesterase therapy is effective in most of them, but is contraindicated in endplate (EP) acetylcholinesterase (AChE) deficiency, the slow-channel syndrome, Dok-7 myasthenia, and beta(2) -laminin deficiency, and is not useful in CMS due to defects in muscle-specific kinase (MuSK), agrin, and plectin.…	Open-label trial	3	COLQ	Congenital myasthenic syndrome due to endplate acetylcholinesterase deficiency caused by pathogenic variants in COLQ	603034: Myasthenic syndrome, congenital, 5; CMS5	p.S169X, p.S169X p.R282X, c.1082delC p.R410W, c.1082delC c.54+14_28del, c.1124_1127dupTGCC	AR compound heterozygous	Salbutamol	Positive	N/A	N/A	N/A	N/A	N/A	N/A
								15	DOK7	Congenital myasthenic syndrome due to defects in docking protein 7 caused by pathogenic variants in DOK7	254300: Myasthenic syndrome, congenital, 10; CMS10	c.54+14_28del, c.1124_1127dupTGCC c.54+14_28del, c.1124_1127dupTGCC c.54+14_28del, c.1124_1127dupTGCC c.54+14_28del, c.1124_1127dupTGCC c.55-1G>T, c.1124_1127dupTGCC c.55-2A>C, c.1124_1127dupTGCC c.55-2A>C, c.1124_1127dupTGCC c.1124_1127dupTGCC, c.1124_1127dupTGCC c.1124_1127dupTGCC, c.1263insC c.1124_1127dupTGCC c.1263insC c.1124_1127dupTGCC, c.1263insC c.1124_1127dupTGCC, c.1263insC c.1124_1127…	AR compound heterozygous	Salbutamol	Positive	N/A	N/A	N/A	N/A	N/A	N/A
117	21721016	2011	Sadeh, M., Shen, X. M. and Engel, A. G.	Beneficial effect of albuterol in congenital myasthenic syndrome with epsilon-subunit mutations	Muscle Nerve	Mutations in the epsilon subunit of the acetylcholine receptor (AChR) are a common cause of congenital myasthenic syndrome (CMS). Patients are usually treated with acetylcholinesterase inhibitors and 3,4-diaminopyridine with modest clinical benefit. We report 2 patients with CMS due to mutations in the AChR epsilon subunit. The first patient carries two heterozygous frameshift mutations, epsilon1…	Case series	2	CHRNE	Congenital myasthenic syndrome due to primary acetylcholine receptor deficiency caused by pathogenic variants in CHRNE	608931: Myasthenic syndrome, congenital, 4c, associated with acetylcholine receptor deficiency; CMS4c	ε127ins5 + ε1293insG εC142Y	AR homozygous and compound heterozygous	Pyridostigmine	Positive	3,4-diaminopyridine	Positive	Salbutamol	Positive	N/A	N/A
118	21150643	2011	Salih, M. A., Oystreck, D. T., Al-Faky, Y. H., Kabiraj, M., Omer, M. I., Subahi, E. M., Beeson, D., Abu-Amero, K. K. and Bosley, T. M.	Congenital myasthenic syndrome due to homozygous CHRNE mutations: report of patients in Arabia	J Neuroophthalmol	We describe the clinical characteristics of 3 siblings from 1 family with congenital myasthenic syndrome due to homozygous mutations of the gene coding for the epsilon subunit of the acetylcholine receptor (CHRNE). Onset of symptoms occurred in the first few months of life with ptosis, restricted ocular motility, mild proximal weakness, and difficulty swallowing. Multiple hospital admissions were…	Familial case report	3	CHRNE	Congenital myasthenic syndrome due to primary acetylcholine receptor deficiency caused by pathogenic variants in CHRNE	608931: Myasthenic syndrome, congenital, 4c, associated with acetylcholine receptor deficiency; CMS4c	123_127dupCTCAC	AR homozygous	Pyridostigmine	Positive	N/A	N/A	N/A	N/A	N/A	N/A
119	21263134	2011	Selcen, D., Juel, V. C., Hobson-Webb, L. D., Smith, E. C., Stickler, D. E., Bite, A. V., Ohno, K. and Engel, A. G.	Myasthenic syndrome caused by plectinopathy	Neurology	BACKGROUND: Plectin crosslinks intermediate filaments to their targets in different tissues. Defects in plectin cause epidermolysis bullosa simplex (EBS), muscular dystrophy (MD), and sometimes pyloric atresia. Association of EBS with a myasthenic syndrome (MyS) was documented in a single patient in 1999. OBJECTIVES: To analyze the clinical, structural, and genetic aspects of a second and fatal c…	Case report	1	PLEC1	Congenital myasthenic syndrome due to plectin deficiency caused by pathogenic variants in PLEC1	N/A	p.Arg2319X + c.12043dupG	AR compound heterozygous	Pyridostigmine	No response	3,4-diaminopyridine	No response	N/A	N/A	N/A	N/A
120	21786365	2011	Shen, X. M., Crawford, T. O., Brengman, J., Acsadi, G., Iannaconne, S., Karaca, E., Khoury, C., Mah, J. K., Edvardson, S., Bajzer, Z., Rodgers, D. and Engel, A. G.	Functional consequences and structural interpretation of mutations of human choline acetyltransferase	Hum Mutat	Choline acetyltransferase (ChAT; EC 2.3.1.6) catalyzes synthesis of acetylcholine from acetyl-CoA (AcCoA) and choline in cholinergic neurons. Mutations in CHAT cause potentially lethal congenital myasthenic syndromes associated with episodic apnea (ChAT-CMS). Here, we analyze the functional consequences of 12 missense and one nonsense mutations of CHAT in 11 patients. Nine of the mutations are no…	Case series	11	CHAT	Congenital myasthenic syndrome due to endplate choline acetyltransferase deficiency caused by pathogenic variants in CHAT	254210: Myasthenic syndrome, congenital, 6, presynaptic; CMS6	c.406G>A p.Val136Met c.605T>G p.Met202Arg c.703G>A p.Ala235Thr c.1262G>C p.Trp421Ser c.1492T>C p.Ser498Pro c.1658C>A p.Thr553Asn c.1663G>T p.Glu555X c.1669G>A p.Ala557Thr c.1715C>G p.Ser572Trp c.1823C>A p.Thr608Asn c.1891G>A p.Ala631Thr c.2066T>G p.Ile689Ser c.2110T>C p.Ser704Pro	AR compound heterozygous	Pyridostigmine	Partial	N/A	N/A	N/A	N/A	N/A	N/A
121	22406191	2012	Witoonpanich, R., Pulkes, T., Dejthevaporn, C., Witoonpanich, P., Yodnopklao, P., Wetchaphanphesat, S., Brengman, J. and Engel, A. G.	Phenotypic heterogeneity in a large Thai slow-channel congenital myasthenic syndrome kinship: Correction	Neuromuscul Disord	The above article was recently published in Neuromuscu- lar Disorders [1]. The article identified the disease-causing mutation as p.Gly153Ser (c.517G>A), in the AChR a sub- unit encoded by CHRNA1. This mutation, first reported in 1996 [2], prolonged the duration of the longest and predominant component of AChR channel opening bursts at the neuromuscular junction from a control value of 2.82 to 13…								N/A	N/A	N/A	N/A	N/A	N/A	N/A	N/A
122	21316238	2011	Witoonpanich, R., Pulkes, T., Dejthevaporn, C., Yodnopklao, P., Witoonpanich, P., Wetchaphanphesat, S., Brengman, J. M. and Engel, A. G.	Phenotypic heterogeneity in a large Thai slow-channel congenital myasthenic syndrome kinship	Neuromuscul Disord	The slow-channel congenital myasthenic syndrome (SCCMS) is an autosomal dominant neuromuscular disorder caused by mutations in different subunits of the acetylcholine receptor (AChR). We here report our clinical findings in three generations of a large Thai kinship suffering from SCCMS and trace the disease to the p.Gly153Ser mutation in the AChR alpha subunit. The same mutation had previously be…	Case series	10	CHRNA1	Slow-channel congenital myasthenic syndrome due to an acetylcholine receptor defect caused by a pathogenic variant in CHRNA1	601462: Myasthenic syndrome, congenital, 1a, slow-channel; CMS1a	c.457G>A (p.Gly153Ala)		Pyridostigmine	No response	N/A	N/A	N/A	N/A	N/A	N/A
123	20012313	2010	Ben Ammar, A., Petit, F., Alexandri, N., Gaudon, K., Bauche, S., Rouche, A., Gras, D., Fournier, E., Koenig, J., Stojkovic, T., Lacour, A., Petiot, P., Zagnoli, F., Viollet, L., Pellegrini, N., Orlikowski, D., Lazaro, L., Ferrer, X., Stoltenburg, G., Paturneau-Jouas, M., Hentati, F., Fardeau, M., Sternberg, D., Hantai, D., Richard, P. and Eymard, B.	Phenotype genotype analysis in 15 patients presenting a congenital myasthenic syndrome due to mutations in DOK7	J Neurol	Congenital myasthenic syndromes (CMSs) are a heterogeneous group of diseases caused by genetic defects affecting neuromuscular transmission. Mutations of DOK7 have recently been described in recessive forms of CMS. Dok-7 is a cytoplasmic post-synaptic protein co-activator of the muscle-specific receptor-tyrosine kinase (MuSK) involved in neuromuscular synaptogenesis and maintenance. We report cli…	Case series	15	DOK7	Congenital myasthenic syndrome due to defects in docking protein 7 caused by pathogenic variants in DOK7	254300: Myasthenic syndrome, congenital, 10; CMS10	c.1124_1127dupTGCC p.Pro376ProfsX30 c.1124_1127dupTGCC p.Pro376ProfsX30 c.346G > A p.Val116Met c.1124_1127dupTGCC p.Pro376ProfsX30 intron 1 inclusiona p.Tyr19ValfsX23 c.1124_1127dupTGCC p.Pro376ProfsX30 c.437C > T p.Pro146Leu c.1124_1127dupTGCC p.Pro376ProfsX30 c.1124_1127dupTGCC p.Pro376ProfsX30 c.1124_1127dupTGCC p.Pro376ProfsX30 c.1124_1127dupTGCC p.Pro376ProfsX30 c.773-2A > G Splice site muta…	AR compound heterozygous	Acetylcholinesterase inhibitors	Equivocal to negative	3,4-diaminopyridine	Positive	Ephedrine	Positive	N/A	N/A
124	20157724	2010	Brugnoni, R., Maggi, L., Canioni, E., Moroni, I., Pantaleoni, C., D'Arrigo, S., Riva, D., Cornelio, F., Bernasconi, P. and Mantegazza, R.	Identification of previously unreported mutations in CHRNA1, CHRNE and RAPSN genes in three unrelated Italian patients with congenital myasthenic syndromes	J Neurol	Congenital myasthenic syndromes are rare genetic disorders compromising neuromuscular transmission. The defects are mainly mutations in the muscle acetylcholine receptor, or associated proteins rapsyn and Dok-7. We analyzed three unrelated Italian patients with typical clinical features of congenital myasthenic syndrome, who all benefitted from cholinesterase inhibitors. We found five mutations: …	Case series	1	CHRNA1	Congenital myasthenic syndrome due to primary acetylcholine receptor deficiency caused by pathogenic variants in CHRNA1	N/A	(c.1133G>A) (αG378D)	AR homozygous	Pyridostigmine	Positive	N/A	N/A	N/A	N/A	N/A	N/A
								1	CHRNE	Congenital myasthenic syndrome due to primary acetylcholine receptor deficiency caused by pathogenic variants in CHRNE	608931: Myasthenic syndrome, congenital, 4c, associated with acetylcholine receptor deficiency; CMS4c	c.24T>G (εY8X), ε874–876del3 (M292del)	AR compound heterozygous	Pyridostigmine	Positive	3,4-diaminopyridine	Positive	N/A	N/A	N/A	N/A
								1	RAPSN	Congenital myasthenic syndrome due to endplate rapsyn deficiency caused by pathogenic variants in RAPSN	616326: Myasthenic syndrome, congenital, 11, associated with acetylcholine receptor deficiency; CMS11	N88K, IVS1 + 2T>G	AR compound heterozygous	Pyridostigmine	Positive	N/A	N/A	N/A	N/A	N/A	N/A
125	20624679	2010	Forrest, K., Mellerio, J. E., Robb, S., Dopping-Hepenstal, P. J., McGrath, J. A., Liu, L., Buk, S. J., Al-Sarraj, S., Wraige, E. and Jungbluth, H.	Congenital muscular dystrophy, myasthenic symptoms and epidermolysis bullosa simplex (EBS) associated with mutations in the PLEC1 gene encoding plectin	Neuromuscul Disord	Mutations in the PLEC1 gene encoding plectin have been reported in neonatal epidermolysis bullosa simplex with muscular dystrophy of later-onset (EBS-MD). A neuromuscular transmission defect has been reported in one previous patient. We report a boy presenting from birth with features of a congenital muscular dystrophy and late-onset myasthenic symptoms. Repetitive nerve stimulation showed signif…	Case report	1	PLEC1	Congenital myasthenic syndrome due to plectin deficiency caused by pathogenic variants in PLEC1	N/A	c.10187delTGTC, IVS11+2 T > G	AR compound heterozygous	Pyridostigmine	Positive	3,4-diaminopyridine	unknown	N/A	N/A	N/A	N/A
126	20458068	2010	Lashley, D., Palace, J., Jayawant, S., Robb, S. and Beeson, D.	Ephedrine treatment in congenital myasthenic syndrome due to mutations in DOK7	Neurology	BACKGROUND: Mutations in the postsynaptic adaptor protein Dok-7 underlie congenital myasthenic syndrome (CMS) with a characteristic limb girdle pattern of muscle weakness. Patients usually do not respond to or worsen with the standard CMS treatments: cholinesterase inhibitors and 3,4-diaminopyridine. However, anecdotal reports suggest they may improve with ephedrine. METHODS: This was an open pro…	Open-label trial	12	DOK7	Congenital myasthenic syndrome due to defects in docking protein 7 caused by pathogenic variants in DOK7	254300: Myasthenic syndrome, congenital, 10; CMS10	c.1124_1127dupTGCC IVS1 + 14del15 c.1124_1127dupTGCC IVS1 + 14del15 c.1124_1127dupTGCC c.1124_1127dupTGCC c.1124_1127dupTGCC c.1124_1127dupTGCC c.1124_1127dupTGCC c.1124_1127dupTGCC c.473G > A c.1124_1127dupTGCC c.414C > T c.1339_1342dupCTGG c.496G > A c.1124_1127dupTGCC c.1378C > T c.1339_1342dupCTGG		Ephedrine	Positive	N/A	N/A	N/A	N/A	N/A	N/A
127	20371544	2010	Maselli, R. A., Arredondo, J., Cagney, O., Ng, J. J., Anderson, J. A., Williams, C., Gerke, B. J., Soliven, B. and Wollmann, R. L.	Mutations in MUSK causing congenital myasthenic syndrome impair MuSK-Dok-7 interaction	Hum Mol Genet	We describe a severe congenital myasthenic syndrome (CMS) caused by two missense mutations in the gene encoding the muscle specific receptor tyrosine kinase (MUSK). The identified MUSK mutations M605I and A727V are both located in the kinase domain of MuSK. Intracellular microelectrode recordings and microscopy studies of the neuromuscular junction conducted in an anconeus muscle biopsy revealed …	Case report	1	MUSK	Congenital myasthenic syndrome due to defects in MuSK caused by pathogenic variants in MUSK	616325: Myasthenic syndrome, congenital, 9, associated with acetylcholine receptor deficiency; CMS9	M605I + A727V	AR compound heterozygous	Pyridostigmine	No response	Salbutamol	Moderately positive	Ephedrine	No response	3,4-diaminopyridine	No response
128	20562457	2010	Mihaylova, V., Scola, R. H., Gervini, B., Lorenzoni, P. J., Kay, C. K., Werneck, L. C., Stucka, R., Guergueltcheva, V., von der Hagen, M., Huebner, A., Abicht, A., Muller, J. S. and Lochmuller, H.	Molecular characterisation of congenital myasthenic syndromes in Southern Brazil	J Neurol Neurosurg Psychiatry	OBJECTIVE: To perform genetic testing of patients with congenital myasthenic syndromes (CMS) from the Southern Brazilian state of Parana. PATIENTS AND METHODS: Twenty-five CMS patients from 18 independent families were included in the study. Known CMS genes were sequenced and restriction digest for the mutation RAPSN p.N88K was performed in all patients. RESULTS: We identified recessive mutations…	Case series	16	CHRNE	Congenital myasthenic syndrome due to primary acetylcholine receptor deficiency caused by pathogenic variants in CHRNE	608931: Myasthenic syndrome, congenital, 4c, associated with acetylcholine receptor deficiency; CMS4c	CHRNE 70insG/127insCTCAC CHRNE 70insG/127insCTCAC CHRNE 70insG/70insG CHRNE 70insG/70insG CHRNE 70insG/70insG CHRNE L11P /L11P CHRNE 1293insG/1293insG CHRNE 1293insG/1293insG CHRNE 1293insG/1293insG CHRNE 1293insG/70insG CHRNE 70insG/S235L CHRNE 70insG/70insG CHRNE 70insG/70insG CHRNE 70insG/70insG CHRNE R286M/R286M CHRNE R286M/R286M	AR homozygous and compound heterozygous	Acetylcholinesterase inhibitors	Positive	N/A	N/A	N/A	N/A	N/A	N/A
								4	DOK7	Congenital myasthenic syndrome due to defects in docking protein 7 caused by pathogenic variants in DOK7	254300: Myasthenic syndrome, congenital, 10; CMS10	DOK7 S45L/1124_1127dupTGCC DOK7 G64R/1124_1127dupTGCC DOK7 G64R/1124_1127dupTGCC DOK7 1124_1127dupTGCC heterozygously	AR compound heterozygous	Acetylcholinesterase inhibitors	Equivocal to negative	N/A	N/A	N/A	N/A	N/A	N/A
								1	COLQ	Congenital myasthenic syndrome due to endplate acetylcholinesterase deficiency caused by pathogenic variants in COLQ	603034: Myasthenic syndrome, congenital, 5; CMS5	>IVS2+1GC/ IVS2>+1GC	AR homozygous	Acetylcholinesterase inhibitors	Equivocal	N/A	N/A	N/A	N/A	N/A	N/A
								1	CHRNA1	Slow-channel congenital myasthenic syndrome due to an acetylcholine receptor defect caused by a pathogenic variant in CHRNA1	601462: Myasthenic syndrome, congenital, 1a, slow-channel; CMS1a	CHRNA1 G153S	AD heterozygous	Fluoxetine	Positive	N/A	N/A	N/A	N/A	N/A	N/A
								1	CHRNB1	Slow-channel congenital myasthenic syndrome due to an acetylcholine receptor defect caused by a pathogenic variant in CHRNB1	616313: Myasthenic syndrome, congenital, 2a, slow-channel; CMS2a	CHRNB1 V266M	AD heterozygous	Fluoxetine	Positive	N/A	N/A	N/A	N/A	N/A	N/A
129	19900826	2010	Schara, U., Christen, H. J., Durmus, H., Hietala, M., Krabetz, K., Rodolico, C., Schreiber, G., Topaloglu, H., Talim, B., Voss, W., Pihko, H., Abicht, A., Muller, J. S. and Lochmuller, H.	Long-term follow-up in patients with congenital myasthenic syndrome due to CHAT mutations	Eur J Paediatr Neurol	BACKGROUND: Congenital myasthenic syndromes (CMSs) are a group of clinically and genetically heterogeneous inherited disorders of the neuromuscular junction. Mutations in the acetylcholine transferase (CHAT) gene cause a pre-synaptic CMS, typically associated with episodic apnoea and worsening of myasthenic symptoms during crises caused by infections, fever or stress. Between crises symptoms may …	Case series	11	CHAT	Congenital myasthenic syndrome due to endplate choline acetyltransferase deficiency caused by pathogenic variants in CHAT	254210: Myasthenic syndrome, congenital, 6, presynaptic; CMS6	G417R S498L, L210P V506L, 1657_1659dupACC 678_684delTGGCACC, I693S R482G I336T	AR homozygous and compound heterozygous	Acetylcholinesterase inhibitors	Positive	3,4-diaminopyridine	Positive	N/A	N/A	N/A	N/A
130	20610155	2010	Srour, M., Bolduc, V., Guergueltcheva, V., Lochmuller, H., Gendron, D., Shevell, M. I., Poulin, C., Mathieu, J., Bouchard, J. P. and Brais, B.	DOK7 mutations presenting as a proximal myopathy in French Canadians	Neuromuscul Disord	DOK7 mutations cause a congenital myasthenic syndrome (OMIM 254300) characterized by a "limb-girdle" phenotype. We identified 7 French-Canadian patients with a previously undiagnosed proximal myopathy. A genome wide scan was performed. Homozygosity mapping identified a locus on chromosome 4p16.2 containing DOK7. Sequencing of DOK7 revealed homozygous 1124_1127dupTGCC mutations in all individuals.…	Case series	7	DOK7	Congenital myasthenic syndrome due to defects in docking protein 7 caused by pathogenic variants in DOK7	254300: Myasthenic syndrome, congenital, 10; CMS10	1124_1127dupTGCC	AR homozygous	Salbutamol	Positive	Ephedrine	Positive	N/A	N/A	N/A	N/A
131	20370815	2010	Yeung, W. L., Lam, C. W. and Ng, P. C.	Intra-familial variation in clinical manifestations and response to ephedrine in siblings with congenital myasthenic syndrome caused by novel COLQ mutations	Dev Med Child Neurol		Familial case report	2	COLQ	Congenital myasthenic syndrome due to endplate acetylcholinesterase deficiency caused by pathogenic variants in COLQ	603034: Myasthenic syndrome, congenital, 5; CMS5	IVS 4-3T>G + IVS 5+1G>A	AR compound heterozygous	Ephedrine	Positive	N/A	N/A	N/A	N/A	N/A	N/A
132	19608775	2009	Burke, G., Allen, D., Arunachalam, R., Beeson, D. and Hammans, S.	A treatable muscle disease	Pract Neurol		Case report	1	DOK7	Congenital myasthenic syndrome due to defects in docking protein 7 caused by pathogenic variants in DOK7	254300: Myasthenic syndrome, congenital, 10; CMS10	1124_1127dupTGCC + Y395X	AR compound heterozygous	3,4-diaminopyridine	Positive	Ephedrine	Positive	N/A	N/A	N/A	N/A
133	19544078	2009	Faber, C. G., Molenaar, P. C., Vles, J. S., Bonifati, D. M., Verschuuren, J. J., van Doorn, P. A., Kuks, J. B., Wokke, J. H., Beeson, D. and De Baets, M.	AChR deficiency due to epsilon-subunit mutations: two common mutations in the Netherlands	J Neurol	Congenital myasthenic syndromes are a clinically and genetically heterogeneous group of hereditary disorders affecting neuromuscular transmission. We have identified mutations within the acetylcholine receptor (AChR) epsilon-subunit gene underlying congenital myasthenic syndromes in nine patients (seven kinships) of Dutch origin. Previously reported mutations epsilon1369delG and epsilonR311Q were…	Case series	9	CHRNE	Congenital myasthenic syndrome due to primary acetylcholine receptor deficiency caused by pathogenic variants in CHRNE	608931: Myasthenic syndrome, congenital, 4c, associated with acetylcholine receptor deficiency; CMS4c	ε1369delG εR311Q ε R64X εR311 εR311Q ε1369delG ε 509insA ε Y15H	AR homozygous and compound heterozygous	Pyridostigmine	Positive	N/A	N/A	N/A	N/A	N/A	N/A
134	19631309	2009	Huze, C., Bauche, S., Richard, P., Chevessier, F., Goillot, E., Gaudon, K., Ben Ammar, A., Chaboud, A., Grosjean, I., Lecuyer, H. A., Bernard, V., Rouche, A., Alexandri, N., Kuntzer, T., Fardeau, M., Fournier, E., Brancaccio, A., Ruegg, M. A., Koenig, J., Eymard, B., Schaeffer, L. and Hantai, D.	Identification of an agrin mutation that causes congenital myasthenia and affects synapse function	Am J Hum Genet	We report the case of a congenital myasthenic syndrome due to a mutation in AGRN, the gene encoding agrin, an extracellular matrix molecule released by the nerve and critical for formation of the neuromuscular junction. Gene analysis identified a homozygous missense mutation, c.5125G>C, leading to the p.Gly1709Arg variant. The muscle-biopsy specimen showed a major disorganization of the neuromusc…	Case report	1	AGRN	Congenital myasthenic syndrome due to agrin deficiency caused by pathogenic variants in AGRN	615120: Myasthenic syndrome, congenital, 8; CMS8	c.5125G>C, p.Gly1709Arg	AR homozygous	Acetylcholinesterase inhibitors	No response	3,4-diaminopyridine	Equivocal	Ephedrine	Positive	N/A	N/A
135	19623452	2009	Lorenzoni, P. J., Scola, R. H., Gervini, B. L., Kay, C. S. and Werneck, L. C.	Electrophysiological study in synaptic congenital myasthenic syndrome: end-plate acetylcholinesterase deficiency	Arq Neuropsiquiatr		Case report	1	COLQ	Congenital myasthenic syndrome due to endplate acetylcholinesterase deficiency caused by pathogenic variants in COLQ	603034: Myasthenic syndrome, congenital, 5; CMS5	IVS2+IG>C	AR homozygous	Pyridostigmine	Partial	Fluoxetine	Partial	N/A	N/A	N/A	N/A
136	19520274	2009	Mallory, L. A., Shaw, J. G., Burgess, S. L., Estrella, E., Nurko, S., Burpee, T. M., Agus, M. S., Darras, B. T., Kunkel, L. M. and Kang, P. B.	Congenital myasthenic syndrome with episodic apnea	Pediatr Neurol	Congenital myasthenic syndrome is difficult to diagnose, especially in the neonate when classic myasthenic signs may not be present. Congenital myasthenic syndrome with episodic apnea is a rare cause of recurrent apnea in infancy. We present an infant with nine severe episodes of apnea in her first 6 months who underwent a prolonged evaluation before ptosis was evident, leading to a diagnosis of …	Case report	1	CHAT	Congenital myasthenic syndrome due to endplate choline acetyltransferase deficiency caused by pathogenic variants in CHAT	254210: Myasthenic syndrome, congenital, 6, presynaptic; CMS6	p.T354M and p.A557T	AR compound heterozygous	Pyridostigmine	Positive	N/A	N/A	N/A	N/A	N/A	N/A
137	19251977	2009	Maselli, R. A., Ng, J. J., Anderson, J. A., Cagney, O., Arredondo, J., Williams, C., Wessel, H. B., Abdel-Hamid, H. and Wollmann, R. L.	Mutations in LAMB2 causing a severe form of synaptic congenital myasthenic syndrome	J Med Genet	BACKGROUND: We describe a severe form of congenital myasthenic syndrome (CMS) associated with congenital nephrosis and ocular malformations caused by two truncating mutations in the gene encoding the laminin beta2 subunit (LAMB2). METHODS AND RESULTS: Mutational analysis in the affected patient, who has a history of a serious untoward reaction to treatment with acetylcholinesterase inhibition, re…	Case report	1	LAMB2	Congenital myasthenic syndrome due to laminin beta 2 deficiency caused by pathogenic variants in LAMB2	N/A	1478delG, 4804delC	AR compound heterozygous	Ephedrine	Positive	N/A	N/A	N/A	N/A	N/A	N/A
138	19949040	2009	Mihaylova, V., Salih, M. A., Mukhtar, M. M., Abuzeid, H. A., El-Sadig, S. M., von der Hagen, M., Huebner, A., Nurnberg, G., Abicht, A., Muller, J. S., Lochmuller, H. and Guergueltcheva, V.	Refinement of the clinical phenotype in musk-related congenital myasthenic syndromes	Neurology		Case series	5	MUSK	Congenital myasthenic syndrome due to defects in MuSK caused by pathogenic variants in MUSK	616325: Myasthenic syndrome, congenital, 9, associated with acetylcholine receptor deficiency; CMS9	c.1031C>G (p.P344R)	AR homozygous	Pyridostigmine	Partial	3,4-diaminopyridine	Partial	N/A	N/A	N/A	N/A
139	19620612	2009	Milone, M., Shen, X. M., Selcen, D., Ohno, K., Brengman, J., Iannaccone, S. T., Harper, C. M. and Engel, A. G.	Myasthenic syndrome due to defects in rapsyn: Clinical and molecular findings in 39 patients	Neurology	BACKGROUND: Pathogenic mutations in rapsyn result in endplate acetylcholine receptor (AChR) deficiency and are a common cause of postsynaptic congenital myasthenic syndromes. METHODS: Clinical, electrophysiologic, pathologic, and molecular studies were done in 39 patients. RESULTS: In all but one patient, the disease presented in the first 2 years of life. In 9 patients, the myasthenic symptoms i…	Case series	39	RAPSN	Congenital myasthenic syndrome due to endplate rapsyn deficiency caused by pathogenic variants in RAPSN	616326: Myasthenic syndrome, congenital, 11, associated with acetylcholine receptor deficiency; CMS11	c.-27C > G, p.N88K c.1177_1178delAA, p.N88K p.L14P, p.N88K p.N88K, p.N88K p.R242W*, p.N88K p.L326P*, p.N88K p.E147K, p.N88K c.C97X, p.N88K c.553_554insGTTCT, p.N88K p.R151P, p.N88K c.-38A/G, c.-38A/G p.E333X, p.N88K p.A142D, p.N88K c.-38A/G, c.-38A/G p.V50_S55del*, p.N88K c.1177_1178delAA, p.N88K p.V165M, p.N88K c.966 + 1GT AG*, p.N88K p.V45M, p.N88K p.L14P, p.N88K p.E147K, p.N88K c.-27C > G, p.N…		Pyridostigmine	Positive	3,4-diaminopyridine	Positive	Ephedrine	Positive	N/A	N/A
140	19289485	2009	Outteryck, O., Richard, P., Lacour, A., Fournier, E., Zephir, H., Gaudon, K., Eymard, B., Hantai, D., Vermersch, P. and Stojkovic, T.	Novel epsilon subunit mutation of the muscle acetylcholine receptor causing a slow-channel congenital myasthenic syndrome	J Neurol Neurosurg Psychiatry		Familial case report	5	CHRNE	Slow-channel congenital myasthenic syndrome due to an acetylcholine receptor defect caused by a pathogenic variant in CHRNE	605809: Myasthenic syndrome, congenital, 4a, slow-channel; CMS4a	(p.Val259Leu)	AD heterozygous	Quinidine	Positive	N/A	N/A	N/A	N/A	N/A	N/A
141	19837590	2009	Schara, U., Barisic, N., Deschauer, M., Lindberg, C., Straub, V., Strigl-Pill, N., Wendt, M., Abicht, A., Muller, J. S. and Lochmuller, H.	Ephedrine therapy in eight patients with congenital myasthenic syndrome due to DOK7 mutations	Neuromuscul Disord	In congenital myasthenic syndrome with DOK7 mutations ephedrine was reported to be beneficial in single patients. We carried out a small, open and prospective cohort study in eight European patients manifesting from birth to 12 years. Five patients showed limb-girdle and facial weakness, three a floppy infant syndrome with bulbar symptoms and/or respiratory distress. Ephedrine was started with 25…	Case series	8	DOK7	Congenital myasthenic syndrome due to defects in docking protein 7 caused by pathogenic variants in DOK7	254300: Myasthenic syndrome, congenital, 10; CMS10	1124_1127dupTGCC 1339_1342dupCTGG 1263insC 1124_1127dupTGCC 1263insC 1124_1127dupTGCC 1124_1127dupTGCC 15-nt deletion in intron 1 (54 + 14_28delGGGGGGGGGGGGCGC) 1124_1127dupTGCC 1124_1127dupTGCC 555delC 1296_1311del16 1124_1127dupTGCC 1124_1127dupTGCC 601C>T 1124_1127dupTGCC	AR homozygous and compound heterozygous	Acetylcholinesterase inhibitors	Equivocal to negative	Ephedrine	Positive	N/A	N/A	N/A	N/A
142	18797171	2009	Yeung, W. L., Lam, C. W., Fung, L. W., Hon, K. L. and Ng, P. C.	Severe congenital myasthenia gravis of the presynaptic type with choline acetyltransferase mutation in a Chinese infant with respiratory failure	Neonatology	We report a severe case of congenital myasthenia gravis in a Chinese newborn who presented with complete ptosis, severe hypotonia, dysphagia and respiratory insufficiency with recurrent apnea that required mechanical ventilatory support since birth. Routine neurophysiologic studies, including the 3-Hz repetitive stimulation test and electromyogram were normal. Neostigmine and edrophonium tests we…	Case report	1	CHAT	Congenital myasthenic syndrome due to endplate choline acetyltransferase deficiency caused by pathogenic variants in CHAT	254210: Myasthenic syndrome, congenital, 6, presynaptic; CMS6	p.T553N + p.S704P	AR compound heterozygous	Pyridostigmine	Partial	N/A	N/A	N/A	N/A	N/A	N/A
143	19289695	2009	Yis, U., Kurul, S. H., Oztura, I., Ozden, O., Akinci, G. and Dirik, E.	Temporary diazepam responsive apneic attacks and congenital myasthenic syndrome	J Child Neurol	Congenital myasthenic syndromes are a genetically and phenotypically heterogeneous group of hereditary disorders affecting neuromuscular junction. Mutations in the gene encoding choline acetyltransferase cause presynaptic defects. The missense mutation I336T has been identified in Turkish population, and most of the cases carrying this mutation present with exercise-induced fatigability and ptosi…	Case report	1	CHAT	Congenital myasthenic syndrome due to endplate choline acetyltransferase deficiency caused by pathogenic variants in CHAT	254210: Myasthenic syndrome, congenital, 6, presynaptic; CMS6	(I336T)	AR homozygous	Pyridostigmine	Equivocal	Diazepam	Positive	N/A	N/A	N/A	N/A
144	18161030	2008	Anderson, J. A., Ng, J. J., Bowe, C., McDonald, C., Richman, D. P., Wollmann, R. L. and Maselli, R. A.	Variable phenotypes associated with mutations in DOK7	Muscle Nerve	Many patients with the limb-girdle variant of congenital myasthenic syndrome (CMS) possess mutations in the human Dok-7 gene (DOK7). We identified six unrelated CMS patients with DOK7 mutations. Two patients, one mildly and the other moderately affected, were homozygous for the previously described 1263insC mutation. The common 1124_1127dupTGCC mutation was detected in the other four patients, wh…	Case series	6	DOK7	Congenital myasthenic syndrome due to defects in docking protein 7 caused by pathogenic variants in DOK7	254300: Myasthenic syndrome, congenital, 10; CMS10	1263insC—homozygous 1124_1127dupTGCC—heterozygous 1263insC—homozygous 1124_1127dupTGCC—heterozygous 1124_1127dupTGCC—heterozygous 1124_1127dupTGCC—heterozygous; 480C>A stop—heterozygous	AR homozygous and compound heterozygous	Pyridostigmine	Equivocal	3,4-diaminopyridine	Positive	Ephedrine		N/A	N/A
145	18180250	2008	Mihaylova, V., Muller, J. S., Vilchez, J. J., Salih, M. A., Kabiraj, M. M., D'Amico, A., Bertini, E., Wolfle, J., Schreiner, F., Kurlemann, G., Rasic, V. M., Siskova, D., Colomer, J., Herczegfalvi, A., Fabriciova, K., Weschke, B., Scola, R., Hoellen, F., Schara, U., Abicht, A. and Lochmuller, H.	Clinical and molecular genetic findings in COLQ-mutant congenital myasthenic syndromes	Brain	Congenital myasthenic syndromes (CMS) are clinically and genetically heterogeneous inherited disorders characterized by impaired neuromuscular transmission. Mutations in the acetylcholinesterase (AChE) collagen-like tail subunit gene (COLQ) cause synaptic basal-lamina associated CMS with end-plate AChE deficiency. Here we present the clinical and molecular genetic findings of 22 COLQ-mutant CMS p…	Case series	22	COLQ	Congenital myasthenic syndrome due to endplate acetylcholinesterase deficiency caused by pathogenic variants in COLQ	603034: Myasthenic syndrome, congenital, 5; CMS5	Y430S/Y430S IVS1-1G4A/950delC Y430S/Y430S IVS1-1G4A/950delC T441A/T441A Y430S/Y430S R341G/R341G 158insC/158insC 109delC/1324delCAG R227X/R227X 1082delC/1082delC W148X/C386S R236X/R236X G237D/797insC 738delA/738delA R227X/R227X IVS2+1G>C/IVS2+1G>C	AR homozygous and compound heterozygous	Acetylcholinesterase inhibitors	No response or negative	Ephedrine	Positive	3,4-diaminopyridine	Positive	N/A	N/A
146	19064877	2008	Richard, P., Gaudon, K., Haddad, H., Ammar, A. B., Genin, E., Bauche, S., Paturneau-Jouas, M., Muller, J. S., Lochmuller, H., Grid, D., Hamri, A., Nouioua, S., Tazir, M., Mayer, M., Desnuelle, C., Barois, A., Chabrol, B., Pouget, J., Koenig, J., Gouider-Khouja, N., Hentati, F., Eymard, B. and Hantai, D.	The CHRNE 1293insG founder mutation is a frequent cause of congenital myasthenia in North Africa	Neurology	OBJECTIVE: Mutations in various genes of the neuromuscular junction cause congenital myasthenic syndrome (CMS). A single truncating mutation (epsilon1293insG) in the acetylcholine receptor epsilon subunit gene (CHRNE) was most often identified in CMS families originating from North Africa and was possibly a founder mutation. METHODS: Twenty-three families were studied with an early onset form of …	Case series	27	CHRNE	Congenital myasthenic syndrome due to primary acetylcholine receptor deficiency caused by pathogenic variants in CHRNE	608931: Myasthenic syndrome, congenital, 4c, associated with acetylcholine receptor deficiency; CMS4c	ε1293insG	AR homozygous	Acetylcholinesterase inhibitors	Positive	3,4-diaminopyridine	Positive	N/A	N/A	N/A	N/A
147	18626973	2008	Selcen, D., Milone, M., Shen, X. M., Harper, C. M., Stans, A. A., Wieben, E. D. and Engel, A. G.	Dok-7 myasthenia: phenotypic and molecular genetic studies in 16 patients	Ann Neurol	OBJECTIVE: Detailed analysis of phenotypic and molecular genetic aspects of Dok-7 myasthenia in 16 patients. METHODS: We assessed our patients by clinical and electromyographic studies, by intercostal muscle biopsies for in vitro microelectrode analysis of neuromuscular transmission and quantitative electron microscopy EM of 409 end plates (EPs), and by mutation analysis, and expression studies o…	Case series	16	DOK7	Congenital myasthenic syndrome due to defects in docking protein 7 caused by pathogenic variants in DOK7	254300: Myasthenic syndrome, congenital, 10; CMS10	596delT, Ile199ThrfsX47 1124_1127dupTGCC, Ala378SerfsX30 Intron 1 inclusion, Tyr19ValfsX23 1124_1127dupTGCC, Ala378SerfsX30 1263delC, Ser422HisfsX34 1124_1127dupTGCC, Ala378SerfsX30 1124_1127dupTGCC, Ala378SerfsX30 1124_1127dupTGCC, Ala378SerfsX30 Intron 1 inclusion, Tyr19ValfsX23 1124_1127dupTGCC, Ala378SerfsX30 601C > T, Arg201X 1124_1127dupTGCC, Ala378SerfsX30 1263insC, Ser422LeufsX97 1124_112…	AR homozygous and compound heterozygous	Pyridostigmine	No response or negative	3,4-diaminopyridine	Equivocal	Ephedrine	Positive	N/A	N/A
148	17439981	2007	Muller, J. S., Herczegfalvi, A., Vilchez, J. J., Colomer, J., Bachinski, L. L., Mihaylova, V., Santos, M., Schara, U., Deschauer, M., Shevell, M., Poulin, C., Dias, A., Soudo, A., Hietala, M., Aarimaa, T., Krahe, R., Karcagi, V., Huebner, A., Beeson, D., Abicht, A. and Lochmuller, H.	Phenotypical spectrum of DOK7 mutations in congenital myasthenic syndromes	Brain	Dok ('downstream-of-kinase') family of cytoplasmic proteins play a role in signalling downstream of receptor and non-receptor phosphotyrosine kinases. Recently, a skeletal muscle receptor tyrosine kinase (MuSK)-interacting cytoplasmic protein termed Dok-7 has been identified. Subsequently, we and others identified mutations in DOK7 as a cause of congenital myasthenic syndromes (CMS), providing ev…	Case series	14	DOK7	Congenital myasthenic syndrome due to defects in docking protein 7 caused by pathogenic variants in DOK7	254300: Myasthenic syndrome, congenital, 10; CMS10	396C>G, H132Q 1124_1127dupTGCC, P376P fsX30 396C>GH, 132Q 1124_1127dupTGCC, P376P fsX30 1378insC, E460P fsX58 1508insC, P503P fsX15 1124_1127dupTGCC, P376P fsX30 1263insC, S422L fsX94 1124_1127dupTGCC, P376P fsX30 1357_1370del14, R452R fsX61 IVS2-1G4T 1124_1127dupTGCC, P376P fsX30 1124_1127dupTGCC, P376P fsX30 1124_1127dupTGCC, P376P fsX30 601C>T, R201X 1124_1127dupTGCC, P376P fsX30 1124_1127dupT…	AR homozygous and compound heterozygous	Pyridostigmine	No response or negative	3,4-diaminopyridine	Equivocal	N/A	N/A	N/A	N/A
149	17452375	2007	Palace, J., Lashley, D., Newsom-Davis, J., Cossins, J., Maxwell, S., Kennett, R., Jayawant, S., Yamanashi, Y. and Beeson, D.	Clinical features of the DOK7 neuromuscular junction synaptopathy	Brain	Mutations in DOK7 have recently been shown to underlie a recessive congenital myasthenic syndrome (CMS) associated with small simplified neuromuscular junctions ('synaptopathy') but normal acetylcholine receptor and acetylcholinesterase function. We identified DOK7 mutations in 27 patients from 24 kinships. Mutation 1124_1127dupTGCC was common, present in 20 out of 24 kinships. All patients were …	Case series	27	DOK7	Congenital myasthenic syndrome due to defects in docking protein 7 caused by pathogenic variants in DOK7	254300: Myasthenic syndrome, congenital, 10; CMS10	c.1124_1127dupTGCC c.1339_1342dupCTGG c.1124_1127dupTGCC c.1263insC c.1124_1127dupTGCC c.1263insC c.1124_1127dupTGCC c.1124_1127dupTGCC c.1124_1127dupTGCC- c.593G4C c.1124_1127dupTGCC c.593G4C c.1124_1127dupTGCC c.1124_1127dupTGCC- c.1124_1127dupTGCC- c.473G4A c.1124_1127dupTGCC c.1124_1127dupTGCC c.1124_1127dupTGCC c.1124_1127dupTGCC c.1263insC c.1124_1127dupTGCC c.1124_1127dupTGCC c.1143insC c.…	AR homozygous and compound heterozygous	Pyridostigmine	No response or negative	3,4-diaminopyridine	Equivocal	Ephedrine	Positive	N/A	N/A
150	16621558	2006	Colomer, J., Muller, J. S., Vernet, A., Nascimento, A., Pons, M., Gonzalez, V., Abicht, A. and Lochmuller, H.	Long-term improvement of slow-channel congenital myasthenic syndrome with fluoxetine	Neuromuscul Disord	We report on a 15-year-old patient who was diagnosed with congenital myasthenic syndrome (CMS) at the age of 7 months. At initial diagnosis, the CMS was not further characterized. The patient was treated for several years with the anticholinesterase drug (Mestinon), without clinical benefit. The patient deteriorated progressively and became dependent on home nocturnal ventilatory support, being u…	Case report	1	CHRNE	Slow-channel congenital myasthenic syndrome due to an acetylcholine receptor defect caused by a pathogenic variant in CHRNE	605809: Myasthenic syndrome, congenital, 4a, slow-channel; CMS4a	L269F (805COT)	AD heterozygous	Fluoxetine	Positive	Acetylcholinesterase inhibitors	Negative	N/A	N/A	N/A	N/A
151	16945936	2006	Cossins, J., Burke, G., Maxwell, S., Spearman, H., Man, S., Kuks, J., Vincent, A., Palace, J., Fuhrer, C. and Beeson, D.	Diverse molecular mechanisms involved in AChR deficiency due to rapsyn mutations	Brain	Congenital myasthenic syndromes are inherited disorders of neuromuscular transmission characterized by fatigable muscle weakness. Autosomal recessive acetylcholine receptor (AChR) deficiency syndromes, in which levels of this receptor at the neuromuscular junction are severely reduced, may be caused by mutations within genes encoding the AChR or the AChR-clustering protein, rapsyn. Most patients …	Case series	15	RAPSN	Congenital myasthenic syndrome due to endplate rapsyn deficiency caused by pathogenic variants in RAPSN	616326: Myasthenic syndrome, congenital, 11, associated with acetylcholine receptor deficiency; CMS11	A25V, N88K R91L, N88K K373del, N88K K373del, N88K K373del, N88K L361R, N88K N88K, N88K N88K, N88K N88K, N88K N88K, N88K N88K, N88K N88K, N88K N88K, N88K N88K, N88K N88K, N88K	AR homozygous and compound heterozygous	Pyridostigmine	Positive	3,4-diaminopyridine	Positive	N/A	N/A	N/A	N/A
152	16931511	2006	Muller, J. S., Baumeister, S. K., Rasic, V. M., Krause, S., Todorovic, S., Kugler, K., Muller-Felber, W., Abicht, A. and Lochmuller, H.	Impaired receptor clustering in congenital myasthenic syndrome with novel RAPSN mutations	Neurology	OBJECTIVE: Congenital myasthenic syndromes (CMS) with underlying RAPSN mutations turned out to be of high clinical relevance due to their worldwide frequency. To date, all reported patients with CMS with sequence variations in the translated region of RAPSN carry the mutation N88K on at least one allele. The authors report two patients lacking the common N88K allele but harboring differing novel …	Case series	2	RAPSN	Congenital myasthenic syndrome due to endplate rapsyn deficiency caused by pathogenic variants in RAPSN	616326: Myasthenic syndrome, congenital, 11, associated with acetylcholine receptor deficiency; CMS11	IVS1-15C>A + R164C IVS1-15C>A + L283P	AR compound heterozygous	Pyridostigmine	Positive	N/A	N/A	N/A	N/A	N/A	N/A
153	16916845	2006	Muller, J. S., Baumeister, S. K., Schara, U., Cossins, J., Krause, S., von der Hagen, M., Huebner, A., Webster, R., Beeson, D., Lochmuller, H. and Abicht, A.	CHRND mutation causes a congenital myasthenic syndrome by impairing co-clustering of the acetylcholine receptor with rapsyn	Brain	The objective of this study was to analyse the mutations of the acetylcholine receptor (AChR) delta subunit gene (CHRND) in a patient with sporadic congenital myasthenic syndrome (CMS). Mutations in various genes encoding proteins expressed at the neuromuscular junction may cause CMS. Mutations of AChR subunit genes lead to end-plate AChR deficiency or to altered kinetic properties of the recepto…	Case report	1	CHRND	Congenital myasthenic syndrome due to defects in acetylcholine receptor clustering caused by pathogenic variants in CHRND	N/A	1141G>A (E381K) + del	AR compound heterozygous	Pyridostigmine	Positive	N/A	N/A	N/A	N/A	N/A	N/A
154	16009904	2005	Bestue-Cardiel, M., Saenz de Cabezon-Alvarez, A., Capablo-Liesa, J. L., Lopez-Pison, J., Pena-Segura, J. L., Martin-Martinez, J. and Engel, A. G.	Congenital endplate acetylcholinesterase deficiency responsive to ephedrine	Neurology	The authors describe two patients with congenital myasthenic syndrome (CMS) with end plate acetylcholinesterase (AChE) deficiency caused by mutations in the collagenic tail (ColQ) of AChE: a homozygous C-terminal Y230S mutation in Patient 1 and Y430S and a C-terminal splice-site mutation in Patient 2. In Patient 1, a Prostigmin (neostigmine bromide) test failed to distinguish between AChE deficie…	Case series	2	COLQ	Congenital myasthenic syndrome due to endplate acetylcholinesterase deficiency caused by pathogenic variants in COLQ	603034: Myasthenic syndrome, congenital, 5; CMS5	Y430S, Y430S IVS15 + 1G>A, Y430S	AR homozygous and compound heterozygous	Ephedrine	Positive	N/A	N/A	N/A	N/A	N/A	N/A
155	16061559	2005	Ohno, K., Tsujino, A., Shen, X. M., Milone, M. and Engel, A. G.	Spectrum of splicing errors caused by CHRNE mutations affecting introns and intron/exon boundaries	J Med Genet	BACKGROUND: Mutations in CHRNE, the gene encoding the muscle nicotinic acetylcholine receptor epsilon subunit, cause congenital myasthenic syndromes. Only three of the eight intronic splice site mutations of CHRNE reported to date have had their splicing consequences characterised. METHODS: We analysed four previously reported and five novel splicing mutations in CHRNE by introducing the entire n…	Case series	5	CHRNE	Congenital myasthenic syndrome due to primary acetylcholine receptor deficiency caused by pathogenic variants in CHRNE	608931: Myasthenic syndrome, congenital, 4c, associated with acetylcholine receptor deficiency; CMS4c	g.IVS6-1G>C g.IVS9-1G>A g.IVS10-9_c.1167dup16 c.1259_g.IVS11+15del23 c.1033delG c.857GRT (p.R286M) c.734CRT (p.P245L)	AR homozygous and compound heterozygous	Pyridostigmine	Partial	N/A	N/A	N/A	N/A	N/A	N/A
156	15615813	2005	Shen, X. M., Ohno, K., Sine, S. M. and Engel, A. G.	Subunit-specific contribution to agonist binding and channel gating revealed by inherited mutation in muscle acetylcholine receptor M3-M4 linker	Brain	We trace the cause of congenital myasthenic syndromes in two patients to mutations in the epsilon subunit of the muscle acetylcholine receptor (AChR). Both patients harbour deletion of an asparagine residue in the epsilon subunit (epsilonN436del) at the C-terminus of the cytoplasmic loop linking the third (M3) and fourth (M4) transmembrane domains. The presence of a null mutation in the second al…	Case series	2	CHRNE	Congenital myasthenic syndrome due to primary acetylcholine receptor deficiency caused by pathogenic variants in CHRNE	608931: Myasthenic syndrome, congenital, 4c, associated with acetylcholine receptor deficiency; CMS4c	εN436del	AR compound heterozygous	Pyridostigmine	Positive	3,4-diaminopyridine	Positive	N/A	N/A	N/A	N/A
157	15965226	2005	Soltanzadeh, P., Muller, J. S., Ghorbani, A., Abicht, A., Lochmuller, H. and Soltanzadeh, A.	An Iranian family with congenital myasthenic syndrome caused by a novel acetylcholine receptor mutation (CHRNE K171X)	J Neurol Neurosurg Psychiatry		Familial case report	3	CHRNE	Congenital myasthenic syndrome due to primary acetylcholine receptor deficiency caused by pathogenic variants in CHRNE	608931: Myasthenic syndrome, congenital, 4c, associated with acetylcholine receptor deficiency; CMS4c	K171X (511A>T)	AR homozygous	Pyridostigmine	Positive	N/A	N/A	N/A	N/A	N/A	N/A
158	15701560	2005	Barisic, N., Muller, J. S., Paucic-Kirincic, E., Gazdik, M., Lah-Tomulic, K., Pertl, A., Sertic, J., Zurak, N., Lochmuller, H. and Abicht, A.	Clinical variability of CMS-EA (congenital myasthenic syndrome with episodic apnea) due to identical CHAT mutations in two infants	Eur J Paediatr Neurol	Congenital myasthenic syndromes (CMS) result from mutations in various synapse-associated genes. Mutations in the choline acetyltransferase (CHAT) gene cause a presynaptic CMS associated with episodic apnea (CMS-EA). We present two unrelated Croatian children affected by CMS-EA. Beside other clinical findings characteristic for CMS, both patients manifested intermittent apneas since early infancy…	Case series	2	CHAT	Congenital myasthenic syndrome due to endplate choline acetyltransferase deficiency caused by pathogenic variants in CHAT	254210: Myasthenic syndrome, congenital, 6, presynaptic; CMS6	S694C and T354M	AR compound heterozygous	Pyridostigmine	Positive	N/A	N/A	N/A	N/A	N/A	N/A
159	15036330	2004	Banwell, B. L., Ohno, K., Sieb, J. P. and Engel, A. G.	Novel truncating RAPSN mutations causing congenital myasthenic syndrome responsive to 3,4-diaminopyridine	Neuromuscul Disord	Rapsyn is essential for clustering the acetylcholine receptor at the postsynaptic membrane of the neuromuscular junction. Direct sequencing of RAPSN in two children with congenital myasthenic syndromes with no mutation in any of the AChR subunits identified two heterozygous recessive mutations in each: a previously characterized N88K mutation in both, and a second frameshifting mutation in Patien…	Case series	2	RAPSN	Congenital myasthenic syndrome due to endplate rapsyn deficiency caused by pathogenic variants in RAPSN	616326: Myasthenic syndrome, congenital, 11, associated with acetylcholine receptor deficiency; CMS11	N88K, 1177delAA N88K, E333X	AR compound heterozygous	Pyridostigmine	Positive	3,4-diaminopyridine	Positive	N/A	N/A	N/A	N/A
160	15145336	2004	Burke, G., Cossins, J., Maxwell, S., Robb, S., Nicolle, M., Vincent, A., Newsom-Davis, J., Palace, J. and Beeson, D.	Distinct phenotypes of congenital acetylcholine receptor deficiency	Neuromuscul Disord	We contrast the phenotypes associated with hereditary acetylcholine receptor deficiency arising from mutations in either the acetylcholine receptor epsilon subunit or the endplate acetylcholine receptor clustering protein rapsyn. Mutational screening was performed by amplification of promoter and coding regions by PCR and direct DNA sequencing. We identified mutations in 37 acetylcholine receptor…	Case series	19	RAPSN	Congenital myasthenic syndrome due to endplate rapsyn deficiency caused by pathogenic variants in RAPSN	616326: Myasthenic syndrome, congenital, 11, associated with acetylcholine receptor deficiency; CMS11	N88K homozygous -38A>G homozygous N88K, 46insC N88K, 551ins5 N88K, R91L N88K, 1177delAA N88K, Q124X N88K, L361R N88K, L14P	AR homozygous and compound heterozygous	Pyridostigmine	Positive	3,4-diaminopyridine	Positive	Ephedrine		N/A	N/A
								18	CHRNE	Congenital myasthenic syndrome due to primary acetylcholine receptor deficiency caused by pathogenic variants in CHRNE	608931: Myasthenic syndrome, congenital, 4c, associated with acetylcholine receptor deficiency; CMS4c	553del7 homozygous 553del7 homozygous 553del7 homozygous 553del7 homozygous P331L homozygous P331L homozygous 1258del23 homozygous 541delG homozygous IVS11 + 74del85 homozygous IVS9 + 1G>T homozygous 553del7, IVS8 2 1G>A 553del7, 911delT M292del, 1030insC E157del, M292del 1033insT, 1206ins19 1033insT, 1206ins19 70insG, 1267delG 70insG, Y15X	AR homozygous and compound heterozygous	Pyridostigmine	Positive	3,4-diaminopyridine	Positive	N/A	N/A	N/A	N/A
161	15496425	2004	Chevessier, F., Faraut, B., Ravel-Chapuis, A., Richard, P., Gaudon, K., Bauche, S., Prioleau, C., Herbst, R., Goillot, E., Ioos, C., Azulay, J. P., Attarian, S., Leroy, J. P., Fournier, E., Legay, C., Schaeffer, L., Koenig, J., Fardeau, M., Eymard, B., Pouget, J. and Hantai, D.	MUSK, a new target for mutations causing congenital myasthenic syndrome	Hum Mol Genet	We report the first case of a human neuromuscular transmission dysfunction due to mutations in the gene encoding the muscle-specific receptor tyrosine kinase (MuSK). Gene analysis identified two heteroallelic mutations, a frameshift mutation (c.220insC) and a missense mutation (V790M). The muscle biopsy showed dramatic pre- and postsynaptic structural abnormalities of the neuromuscular junction a…	Case report	1	MUSK	Congenital myasthenic syndrome due to defects in MuSK caused by pathogenic variants in MUSK	616325: Myasthenic syndrome, congenital, 9, associated with acetylcholine receptor deficiency; CMS9	(c.220insC) (V790M)	AR compound heterozygous	Pyridostigmine	No response	3,4-diaminopyridine	Positive	N/A	N/A	N/A	N/A
162	15328566	2004	Ioos, C., Barois, A., Richard, P., Eymard, B., Hantai, D. and Estournet-Mathiaud, B.	Congenital myasthenic syndrome due to rapsyn deficiency: three cases with arthrogryposis and bulbar symptoms	Neuropediatrics	We report the cases of 3 children with postsynaptic congenital myasthenic syndrome with acetylcholine receptor deficiency due to rapsyn deficiency. Symptoms began at the neonatal period with hypotonia, arthrogryposis, bulbar symptoms, and respiratory distress. Two of the 3 children needed tracheostomy and gastrostomy. Electromyograms showed a decremental response to repetitive stimulation. Muscle…	Case series	3	RAPSN	Congenital myasthenic syndrome due to endplate rapsyn deficiency caused by pathogenic variants in RAPSN	616326: Myasthenic syndrome, congenital, 11, associated with acetylcholine receptor deficiency; CMS11	N88K, Y86X, 1083_1084dupCT, IVS4-2 A>G	AR compound heterozygous	Acetylcholinesterase inhibitors	Positive	N/A	N/A	N/A	N/A	N/A	N/A
163	15482960	2004	Muller, J. S., Abicht, A., Christen, H. J., Stucka, R., Schara, U., Mortier, W., Huebner, A. and Lochmuller, H.	A newly identified chromosomal microdeletion of the rapsyn gene causes a congenital myasthenic syndrome	Neuromuscul Disord	The objective is mutation analysis of the RAPSN gene in a patient with sporadic congenital myasthenic syndrome (CMS). Mutations in various genes encoding proteins expressed at the neuromuscular junction may cause CMS. Most mutations affect the epsilon subunit gene of the acetylcholine receptor (AChR) leading to endplate AChR deficiency. Recently, mutations in the RAPSN gene have been identified i…	Case report	1	RAPSN	Congenital myasthenic syndrome due to endplate rapsyn deficiency caused by pathogenic variants in RAPSN	616326: Myasthenic syndrome, congenital, 11, associated with acetylcholine receptor deficiency; CMS11	N88K + deletion	AR compound heterozygous	Pyridostigmine	Positive	N/A	N/A	N/A	N/A	N/A	N/A
164	15248101	2004	Muller, J. S., Petrova, S., Kiefer, R., Stucka, R., Konig, C., Baumeister, S. K., Huebner, A., Lochmuller, H. and Abicht, A.	Synaptic congenital myasthenic syndrome in three patients due to a novel missense mutation (T441A) of the COLQ gene	Neuropediatrics	Congenital myasthenic syndromes (CMS) with deficiency of endplate acetylcholinesterase (AChE) are caused by mutations in the synapse specific collagenic tail subunit gene (COLQ) of AChE. We identified a novel missense mutation (T441A) homozygously in three CMS patients from two unrelated German families. The mutation is located in the C-terminal region of the ColQ protein, which initiates assembl…	Case series	3	COLQ	Congenital myasthenic syndrome due to endplate acetylcholinesterase deficiency caused by pathogenic variants in COLQ	603034: Myasthenic syndrome, congenital, 5; CMS5	T441A	AR homozygous	Pyridostigmine	Negative	3,4-diaminopyridine	Equivocal	N/A	N/A	N/A	N/A
165	14504330	2003	Burke, G., Cossins, J., Maxwell, S., Owens, G., Vincent, A., Robb, S., Nicolle, M., Hilton-Jones, D., Newsom-Davis, J., Palace, J. and Beeson, D.	Rapsyn mutations in hereditary myasthenia: distinct early- and late-onset phenotypes	Neurology	Rapsyn mutations in 16 unrelated patients with a congenital/hereditary myasthenic syndrome were identified, and a mutation (N88K) common to each of them was found. Two distinct phenotypes were noted: early and late onset. The former is frequently associated with arthrogryposis multiplex congenita and life-threatening crises. The late-onset phenotype developed in adolescence or adulthood and was i…	Case series	16	RAPSN	Congenital myasthenic syndrome due to endplate rapsyn deficiency caused by pathogenic variants in RAPSN	616326: Myasthenic syndrome, congenital, 11, associated with acetylcholine receptor deficiency; CMS11	N88K/46insC N88K/551ins5 N88K/N88K N88K/L361R N88K/551ins5 N88K/L14P N88K/1177del2 N88K/Q124X N88K/N88K N88K/1177del2 N88K/N88K N88K/N88K N88K/N88K	AR homozygous and compound heterozygous	Acetylcholinesterase inhibitors	Positive	N/A	N/A	N/A	N/A	N/A	N/A
166	12771277	2003	Harper, C. M., Fukodome, T. and Engel, A. G.	Treatment of slow-channel congenital myasthenic syndrome with fluoxetine	Neurology	The authors found that fluoxetine significantly shortens at 5 microM/L and nearly normalizes at 10 microM/L the prolonged opening bursts of slow-channel congenital myasthenic syndrome (SCCMS) acetylcholine receptors (AChR) expressed in fibroblasts. Prompted by this observation, they treated two SCCMS patients allergic to quinidine with up to 80 to 120 mg of fluoxetine per day over 3 years (serum …	Case series	2	CHRNE	Slow-channel congenital myasthenic syndrome due to an acetylcholine receptor defect caused by a pathogenic variant in CHRNE	605809: Myasthenic syndrome, congenital, 4a, slow-channel; CMS4a	εT264P εL269F	AD heterozygous	Fluoxetine	Positive	N/A	N/A	N/A	N/A	N/A	N/A
167	12609505	2003	Ishigaki, K., Nicolle, D., Krejci, E., Leroy, J. P., Koenig, J., Fardeau, M., Eymard, B. and Hantai, D.	Two novel mutations in the COLQ gene cause endplate acetylcholinesterase deficiency	Neuromuscul Disord	Congenital myasthenic syndromes with endplate acetylcholinesterase deficiency are very rare autosomal recessive diseases, characterized by onset of the disease in childhood, general weakness increased by exertion, ophthalmoplegia and refractoriness to anticholinesterase drugs. To date, all reported cases are due to mutations within the gene encoding ColQ, a specific collagen that anchors acetylch…	Case series	2	COLQ	Congenital myasthenic syndrome due to endplate acetylcholinesterase deficiency caused by pathogenic variants in COLQ	603034: Myasthenic syndrome, congenital, 5; CMS5	IVS1-1G>A, 788insC IVS1-1G>A, R236X	AR compound heterozygous	Acetylcholinesterase inhibitors	No response	N/A	N/A	N/A	N/A	N/A	N/A
168	12548525	2003	Maselli, R. A., Chen, D., Mo, D., Bowe, C., Fenton, G. and Wollmann, R. L.	Choline acetyltransferase mutations in myasthenic syndrome due to deficient acetylcholine resynthesis	Muscle Nerve	The myasthenic syndrome due to abnormal acetylcholine resynthesis is characterized by early onset, recessive inheritance, and recurrent episodes of potentially fatal apnea. Mutations in the gene encoding choline acetyltransferase (CHAT) have been found to account for this condition. We have identified five patients from three independent families with features of this disease including, in four p…	Case series	5	CHAT	Congenital myasthenic syndrome due to endplate choline acetyltransferase deficiency caused by pathogenic variants in CHAT	254210: Myasthenic syndrome, congenital, 6, presynaptic; CMS6	629 T>C, L210P 631 C>G, P211A 580 G>T, V194L 1516 G>T, V506L 1642 C>T, R548stop 2081 C>T, S694C	AR compound heterozygous	Acetylcholinesterase inhibitors	Equivocal to no response	N/A	N/A	N/A	N/A	N/A	N/A
169	12929188	2003	Maselli, R. A., Dunne, V., Pascual-Pascual, S. I., Bowe, C., Agius, M., Frank, R. and Wollmann, R. L.	Rapsyn mutations in myasthenic syndrome due to impaired receptor clustering	Muscle Nerve	Rapsyn, a 43-kDa postsynaptic protein, is essential for anchoring and clustering acetylcholine receptors (AChRs) at the endplate (EP). Mutations in the rapsyn gene have been found to cause a postsynaptic congenital myasthenic syndrome (CMS). We detected six patients with CMS due to mutations in the rapsyn gene (RAPSN). In vitro studies performed in the anconeus muscle biopsies of four patients sh…	Case series	6	RAPSN	Congenital myasthenic syndrome due to endplate rapsyn deficiency caused by pathogenic variants in RAPSN	616326: Myasthenic syndrome, congenital, 11, associated with acetylcholine receptor deficiency; CMS11	L14P N88K 46insC Y269X	AR homozygous and compound heterozygous	Pyridostigmine	Positive	3,4-diaminopyridine	Positive	N/A	N/A	N/A	N/A
170	12796535	2003	Muller, J. S., Mildner, G., Muller-Felber, W., Schara, U., Krampfl, K., Petersen, B., Petrova, S., Stucka, R., Mortier, W., Bufler, J., Kurlemann, G., Huebner, A., Merlini, L., Lochmuller, H. and Abicht, A.	Rapsyn N88K is a frequent cause of congenital myasthenic syndromes in European patients	Neurology	BACKGROUND: Mutations in various genes of the neuromuscular junction may cause congenital myasthenic syndromes (CMS). Most mutations identified to date affect the epsilon-subunit gene of the acetylcholine receptor (AChR), leading to end-plate AChR deficiency. Recently, three different mutations in the RAPSN gene have been identified in four CMS patients with AChR deficiency. OBJECTIVE: To perform…	Case series	12	RAPSN	Congenital myasthenic syndrome due to endplate rapsyn deficiency caused by pathogenic variants in RAPSN	616326: Myasthenic syndrome, congenital, 11, associated with acetylcholine receptor deficiency; CMS11	N88K (264C>A) Q3K (7C>A) A246V (737C>T) G291D (872G>A)	AR homozygous and compound heterozygous	Pyridostigmine	Positive	N/A	N/A	N/A	N/A	N/A	N/A
171	12651869	2003	Ohno, K., Sadeh, M., Blatt, I., Brengman, J. M. and Engel, A. G.	E-box mutations in the RAPSN promoter region in eight cases with congenital myasthenic syndrome	Hum Mol Genet	Myogenic determination factors are basic helix-loop-helix proteins that govern specification and differentiation of muscle cells, and bind to the E-box consensus sequence CANNTG in promoter regions of muscle-specific genes. No E-box mutation has been reported to date. RAPSN encodes rapsyn, a 43 kDa postsynaptic peripheral membrane protein that clusters the nicotinic acetylcholine receptor at the …	Case series	8	RAPSN	Congenital myasthenic syndrome due to endplate rapsyn deficiency caused by pathogenic variants in RAPSN	616326: Myasthenic syndrome, congenital, 11, associated with acetylcholine receptor deficiency; CMS11	-27C>G -38A>G	AR compound heterozygous	Pyridostigmine	Positive	N/A	N/A	N/A	N/A	N/A	N/A
172	12807980	2003	Richard, P., Gaudon, K., Andreux, F., Yasaki, E., Prioleau, C., Bauche, S., Barois, A., Ioos, C., Mayer, M., Routon, M. C., Mokhtari, M., Leroy, J. P., Fournier, E., Hainque, B., Koenig, J., Fardeau, M., Eymard, B. and Hantai, D.	Possible founder effect of rapsyn N88K mutation and identification of novel rapsyn mutations in congenital myasthenic syndromes	J Med Genet		Case series	5	RAPSN	Congenital myasthenic syndrome due to endplate rapsyn deficiency caused by pathogenic variants in RAPSN	616326: Myasthenic syndrome, congenital, 11, associated with acetylcholine receptor deficiency; CMS11	264C>A, N88K 493G>A, V165M IVS4-2A>G 1083_1084dupCT	AR homozygous and compound heterozygous	Acetylcholinesterase inhibitors	Positive	N/A	N/A	N/A	N/A	N/A	N/A
173	12609506	2003	Schmidt, C., Abicht, A., Krampfl, K., Voss, W., Stucka, R., Mildner, G., Petrova, S., Schara, U., Mortier, W., Bufler, J., Huebner, A. and Lochmuller, H.	Congenital myasthenic syndrome due to a novel missense mutation in the gene encoding choline acetyltransferase	Neuromuscul Disord	Congenital myasthenic syndromes are caused by different genetic defects affecting proteins expressed at the neuromuscular junction. Recently, the first molecular genetic defect resulting in a presynaptic congenital myasthenic syndrome has been reported: Recessive loss-of-function mutations in CHAT, the gene encoding choline acetyltransferase, were described in five congenital myasthenic syndrome …	Case series	3	CHAT	Congenital myasthenic syndrome due to endplate choline acetyltransferase deficiency caused by pathogenic variants in CHAT	254210: Myasthenic syndrome, congenital, 6, presynaptic; CMS6	I336T	AR homozygous	Pyridostigmine	Positive	N/A	N/A	N/A	N/A	N/A	N/A
174	12588888	2003	Shen, X. M., Ohno, K., Tsujino, A., Brengman, J. M., Gingold, M., Sine, S. M. and Engel, A. G.	Mutation causing severe myasthenia reveals functional asymmetry of AChR signature cystine loops in agonist binding and gating	J Clin Invest	We describe a highly disabling congenital myasthenic syndrome (CMS) associated with rapidly decaying, low-amplitude synaptic currents, and trace its cause to a valine to leucine mutation in the signature cystine loop (cys-loop) of the AChR alpha subunit. The recently solved crystal structure of an ACh-binding protein places the cys-loop at the junction between the extracellular ligand-binding and…	Case report	1	CHRNA1	Fast-channel congenital myasthenic syndrome due to an acetylcholine receptor defect caused by pathogenic variants in CHRNA1	608930: Myasthenic syndrome, congenital, 1b, fast-channel; CMS1b	αV132L	AD heterozygous	Acetylcholinesterase inhibitors	Partial	3,4-diaminopyridine	Partial	N/A	N/A	N/A	N/A
175	12766226	2003	Tsujino, A., Maertens, C., Ohno, K., Shen, X. M., Fukuda, T., Harper, C. M., Cannon, S. C. and Engel, A. G.	Myasthenic syndrome caused by mutation of the SCN4A sodium channel	Proc Natl Acad Sci U S A	In a myasthenic syndrome associated with fatigable generalized weakness and recurrent attacks of respiratory and bulbar paralysis since birth, nerve stimulation at physiologic rates rapidly decremented the compound muscle action potential. Intercostal muscle studies revealed no abnormality of the resting membrane potential, evoked quantal release, synaptic potentials, acetylcholine receptor chann…	Case report	1	SCN4A	Congenital myasthenic syndrome due to a sodium channel 1.4 defect caused by pathogenic variants in SCN4A	614198: Myasthenic syndrome, congenital, 16; CMS16	S246L, V1442E	AR compound heterozygous	Pyridostigmine	Positive	Acetazolamide	Positive	N/A	N/A	N/A	N/A
176	11960891	2002	Abicht, A., Stucka, R., Schmidt, C., Briguet, A., Hopfner, S., Song, I. H., Pongratz, D., Muller-Felber, W., Ruegg, M. A. and Lochmuller, H.	A newly identified chromosomal microdeletion and an N-box mutation of the AChR epsilon gene cause a congenital myasthenic syndrome	Brain	Congenital myasthenic syndromes (CMSs) are frequently caused by mutations of the coding region of the acetylcholine receptor epsilon subunit (AChRepsilon) gene leading to a reduced expression of the acetylcholine receptor (AChR) at the postsynaptic membrane. Two recent observations have linked two different N-box mutations of the human AChRepsilon promoter to a clinical CMS phenotype. N-boxes are…	Case report	1	CHRNE	Congenital myasthenic syndrome due to primary acetylcholine receptor deficiency caused by pathogenic variants in CHRNE	608931: Myasthenic syndrome, congenital, 4c, associated with acetylcholine receptor deficiency; CMS4c	ε154G>A, del1290bp	AR compound heterozygous	Pyridostigmine	Positive	N/A	N/A	N/A	N/A	N/A	N/A
177	12536367	2002	Barisic, N., Schmidt, C., Sidorova, O. P., Herczegfalvi, A., Gekht, B. M., Song, I. H., Stucka, R., Karcagi, V., Abicht, A. and Lochmuller, H.	Congenital myasthenic syndrome (CMS) in three European kinships due to a novel splice mutation (IVS7 - 2 A/G) in the epsilon acetylcholine receptor (AChR) subunit gene	Neuropediatrics	Mutations in the epsilon-acetylcholine receptor (AChR epsilon) subunit gene cause congenital myasthenic syndromes (CMS) with postsynaptic neural transmission defects. We present 3 male and 2 female patients from three unrelated Croatian, Hungarian, and Russian families with autosomal recessive CMS. All patients manifested with variable degrees of ophthalmoparesis and generalized, fatiguable muscl…	Case series	5	CHRNE	Congenital myasthenic syndrome due to primary acetylcholine receptor deficiency caused by pathogenic variants in CHRNE	608931: Myasthenic syndrome, congenital, 4c, associated with acetylcholine receptor deficiency; CMS4c	ε(IVS7-2A/G) ε70insG ε1293insG	AR homozygous and compound heterozygous	Pyridostigmine	Positive	N/A	N/A	N/A	N/A	N/A	N/A
178	12117478	2002	Byring, R. F., Pihko, H., Tsujino, A., Shen, X. M., Gustafsson, B., Hackman, P., Ohno, K., Engel, A. G. and Udd, B.	Congenital myasthenic syndrome associated with episodic apnea and sudden infant death	Neuromuscul Disord	The sudden infant death syndrome has multiple etiologies. Some congenital myasthenic syndromes can cause sudden infant death syndrome by apnea, but the frequency of this etiology is unknown. We report here a young patient with sudden respiratory crises culminating in apnea followed by recovery, against a background of no or variable myasthenic symptoms without dyspnea. One sib without myasthenic …	Case series	2	CHAT	Congenital myasthenic syndrome due to endplate choline acetyltransferase deficiency caused by pathogenic variants in CHAT	254210: Myasthenic syndrome, congenital, 6, presynaptic; CMS6	S498L, L210P	AR compound heterozygous	Pyridostigmine	Positive	N/A	N/A	N/A	N/A	N/A	N/A
179	12141316	2002	Croxen, R., Hatton, C., Shelley, C., Brydson, M., Chauplannaz, G., Oosterhuis, H., Vincent, A., Newsom-Davis, J., Colquhoun, D. and Beeson, D.	Recessive inheritance and variable penetrance of slow-channel congenital myasthenic syndromes	Neurology	BACKGROUND: Slow-channel congenital myasthenic syndromes (SCCMS) typically show dominant inheritance. They are caused by missense mutations within the subunits of muscle nicotinic acetylcholine receptors (AChR) that result in prolonged ion channel activations. SCCMS mutations within the AChR subunit are located in various functional domains, whereas fully described mutations in AChR non- subunits…	Case series	3	CHRNE	Slow-channel congenital myasthenic syndrome due to an acetylcholine receptor defect caused by a pathogenic variant in CHRNE	605809: Myasthenic syndrome, congenital, 4a, slow-channel; CMS4a	εL78P and εL221F	AD heterozygous	Pyridostigmine	No response	N/A	N/A	N/A	N/A	N/A	N/A
180	12417530	2002	Ealing, J., Webster, R., Brownlow, S., Abdelgany, A., Oosterhuis, H., Muntoni, F., Vaux, D. J., Vincent, A. and Beeson, D.	Mutations in congenital myasthenic syndromes reveal an epsilon subunit C-terminal cysteine, C470, crucial for maturation and surface expression of adult AChR	Hum Mol Genet	Many congenital myasthenic syndromes (CMS) are associated with mutations in the genes encoding the acetylcholine receptor (AChR), an oligomeric protein with the structure alpha(2)betadelta epsilon. AChR deficiency is frequently due to homozygous or heteroallelic mutations in the AChR epsilon subunit, most of which cause truncation of the polypeptide chain and loss of surface expression of AChR. H…	Case series	6	CHRNE	Congenital myasthenic syndrome due to primary acetylcholine receptor deficiency caused by pathogenic variants in CHRNE	608931: Myasthenic syndrome, congenital, 4c, associated with acetylcholine receptor deficiency; CMS4c	ε1369delG, ε1369delG ε1369delG, εY15H ε1369delG, εR311Q ε1369delG, ε509insA εR311Q, εR311Q	AR homozygous and compound heterozygous	Acetylcholinesterase inhibitors	Positive	N/A	N/A	N/A	N/A	N/A	N/A
181	11782989	2002	Gomez, C. M., Maselli, R. A., Vohra, B. P., Navedo, M., Stiles, J. R., Charnet, P., Schott, K., Rojas, L., Keesey, J., Verity, A., Wollmann, R. W. and Lasalde-Dominicci, J.	Novel delta subunit mutation in slow-channel syndrome causes severe weakness by novel mechanisms	Ann Neurol	We investigated the basis for a novel form of the slow-channel congenital myasthenic syndrome presenting in infancy in a single individual as progressive weakness and impaired neuromuscular transmission without overt degeneration of the motor endplate. Prolonged low-amplitude synaptic currents in biopsied anconeus muscle at 9 years of age suggested a kinetic disorder of the muscle acetylcholine r…	Case report	1	CHRND	Slow-channel congenital myasthenic syndrome due to an acetylcholine receptor defect caused by a pathogenic variant in CHRND	616321: Myasthenic syndrome, congenital, 3a, slow-channel; CMS3a	δS268F	AD heterozygous	Acetylcholinesterase inhibitors	No response	N/A	N/A	N/A	N/A	N/A	N/A
182	11932977	2002	Kohara, N., Lin, T. S., Fukudome, T., Kimura, J., Sakamoto, T., Kaji, R. and Shibasaki, H.	Pathophysiology of weakness in a patient with congenital end-plate acetylcholinesterase deficiency	Muscle Nerve	A Japanese patient with congenital end-plate acetylcholinesterase (AChE) deficiency developed severe proximal and truncal muscle weakness with preservation of distal strength. Electrophysiological studies included a train of stimuli at 3 HZ, which induced a marked decremental response in the deltoid but not in the first dorsal interosseous (FDI) muscle. Single fiber electromyography (EMG) reveale…	Case report	1	COLQ	Congenital myasthenic syndrome due to endplate acetylcholinesterase deficiency caused by pathogenic variants in COLQ	603034: Myasthenic syndrome, congenital, 5; CMS5	R410Q, C444Y	AR compound heterozygous	Acetylcholinesterase inhibitors	No response	N/A	N/A	N/A	N/A	N/A	N/A
183	12453093	2002	Kraner, S., Burgunder, J. M., Rosler, K. M., Steinlein, O. K. and Sieb, J. P.	Congenital myasthenic syndrome due to heteroallelic nonsense/missense mutations in the acetylcholine receptor epsilon subunit gene	Eur J Neurol		Case report	1	CHRNE	Congenital myasthenic syndrome due to primary acetylcholine receptor deficiency caused by pathogenic variants in CHRNE	608931: Myasthenic syndrome, congenital, 4c, associated with acetylcholine receptor deficiency; CMS4c	εQ382X εR311W		Pyridostigmine	Positive	N/A	N/A	N/A	N/A	N/A	N/A
184	11791205	2002	Ohno, K., Engel, A. G., Shen, X. M., Selcen, D., Brengman, J., Harper, C. M., Tsujino, A. and Milone, M.	Rapsyn mutations in humans cause endplate acetylcholine-receptor deficiency and myasthenic syndrome	Am J Hum Genet	Congenital myasthenic syndromes (CMSs) stem from genetic defects in endplate (EP)-specific presynaptic, synaptic, and postsynaptic proteins. The postsynaptic CMSs identified to date stem from a deficiency or kinetic abnormality of the acetylcholine receptor (AChR). All CMSs with a kinetic abnormality of AChR, as well as many CMSs with a deficiency of AChR, have been traced to mutations in AChR-su…	Case series	4	RAPSN	Congenital myasthenic syndrome due to endplate rapsyn deficiency caused by pathogenic variants in RAPSN	616326: Myasthenic syndrome, congenital, 11, associated with acetylcholine receptor deficiency; CMS11	41T>C, L14P 264C>A, N88K 553ins5	AR homozygous and compound heterozygous	Acetylcholinesterase inhibitors	Positive	3,4-diaminopyridine	Positive	N/A	N/A	N/A	N/A
185	11865139	2002	Shapira, Y. A., Sadeh, M. E., Bergtraum, M. P., Tsujino, A., Ohno, K., Shen, X. M., Brengman, J., Edwardson, S., Matoth, I. and Engel, A. G.	Three novel COLQ mutations and variation of phenotypic expressivity due to G240X	Neurology	OBJECTIVE: To determine the molecular basis and consequences of endplate (EP) acetylcholinesterase (AChE) deficiency. BACKGROUND: The EP species AChE is an asymmetric enzyme consisting of a tail subunit composed of three collagenic strands (ColQ), each attached to a tetramer of catalytic subunits. The tail subunit is essential for insertion of AChE into the synaptic basal lamina. Human EP AChE de…	Case series	8	COLQ	Congenital myasthenic syndrome due to endplate acetylcholinesterase deficiency caused by pathogenic variants in COLQ	603034: Myasthenic syndrome, congenital, 5; CMS5	275insC Q211X G240X	AR homozygous and compound heterozygous	Pyridostigmine	No response	Edrophonium	Negative	N/A	N/A	N/A	N/A
186	12499478	2002	Shen, X. M., Ohno, K., Fukudome, T., Tsujino, A., Brengman, J. M., De Vivo, D. C., Packer, R. J. and Engel, A. G.	Congenital myasthenic syndrome caused by low-expressor fast-channel AChR delta subunit mutation	Neurology	OBJECTIVE: To determine the molecular basis of a disabling congenital myasthenic syndrome (CMS) observed in two related and one unrelated Arab kinship. BACKGROUND: CMS can arise from defects in presynaptic, synaptic basal lamina-associated, or postsynaptic proteins. Most CMS are postsynaptic, and most reside in the AChR epsilon subunit; only two mutations have been reported in the AChR delta subu…	Case series	3	CHRND	Fast-channel congenital myasthenic syndrome due to an acetylcholine receptor defect caused by pathogenic variants in CHRND	616322: Myasthenic syndrome, congenital, 3b, fast-channel; CMS3b	δP250Q	AR homozygous	Pyridostigmine	Partial	3,4-diaminopyridine	Partial	N/A	N/A	N/A	N/A
187	11435464	2001	Brownlow, S., Webster, R., Croxen, R., Brydson, M., Neville, B., Lin, J. P., Vincent, A., Newsom-Davis, J. and Beeson, D.	Acetylcholine receptor delta subunit mutations underlie a fast-channel myasthenic syndrome and arthrogryposis multiplex congenita	J Clin Invest	Limitation of movement during fetal development may lead to multiple joint contractures in the neonate, termed arthrogryposis multiplex congenita. Neuromuscular disorders are among the many different causes of reduced fetal movement. Many congenital myasthenic syndromes (CMSs) are due to mutations of the adult-specific epsilon subunit of the acetylcholine receptor (AChR), and, thus, functional de…	Case report	1	CHRND	Fast-channel congenital myasthenic syndrome due to an acetylcholine receptor defect caused by pathogenic variants in CHRND	616322: Myasthenic syndrome, congenital, 3b, fast-channel; CMS3b	δ756ins2, δE59K	AR compound heterozygous	Pyridostigmine	Positive	N/A	N/A	N/A	N/A	N/A	N/A
188	11030414	2000	Sieb, J. P., Kraner, S., Rauch, M. and Steinlein, O. K.	Immature end-plates and utrophin deficiency in congenital myasthenic syndrome caused by epsilon-AChR subunit truncating mutations	Hum Genet	Congenital myasthenic syndromes (CMS) are inborn disorders due to presynaptic, synaptic, or postsynaptic defects of neuromuscular transmission. Some previously described kinships with typical signs of CMS showed a marked deficiency of acetylcholine receptors (AChR) and utrophin at the neuromuscular junctions. Additionally, the end-plate ultrastructure was immature, with reduced enfolding of the p…	Case series	3	CHRNE	Congenital myasthenic syndrome due to primary acetylcholine receptor deficiency caused by pathogenic variants in CHRNE	608931: Myasthenic syndrome, congenital, 4c, associated with acetylcholine receptor deficiency; CMS4c	ε911delT, εIVS4+1G>A ε1030delC, εR64X	AR compound heterozygous	Pyridostigmine	Positive	N/A	N/A	N/A	N/A	N/A	N/A
189	10976646	2000	Sieb, J. P., Kraner, S., Schrank, B., Reitter, B., Goebel, T. H., Tzartos, S. J. and Steinlein, O. K.	Severe congenital myasthenic syndrome due to homozygosity of the 1293insG epsilon-acetylcholine receptor subunit mutation	Ann Neurol	Recently, a congenital myasthenic syndrome (CMS) with end-plate acetylcholine receptor (AChR) deficiency due to missense mutations in the genes for the AChR subunit was described. The first observed patient with this CMS was heteroallelic for the two epsilon-AChR subunit mutations epsilon1101insT and epsilon1293insG. This patient had only a moderate phenotype with mild muscle weakness and abnorma…	Case report	1	CHRNE	Congenital myasthenic syndrome due to primary acetylcholine receptor deficiency caused by pathogenic variants in CHRNE	608931: Myasthenic syndrome, congenital, 4c, associated with acetylcholine receptor deficiency; CMS4c	1293insG	AR homozygous	Pyridostigmine	Partial	N/A	N/A	N/A	N/A	N/A	N/A
190	10534268	1999	Abicht, A., Stucka, R., Karcagi, V., Herczegfalvi, A., Horvath, R., Mortier, W., Schara, U., Ramaekers, V., Jost, W., Brunner, J., Janssen, G., Seidel, U., Schlotter, B., Muller-Felber, W., Pongratz, D., Rudel, R. and Lochmuller, H.	A common mutation (epsilon1267delG) in congenital myasthenic patients of Gypsy ethnic origin	Neurology	OBJECTIVE: Mutation analysis of the acetylcholine receptor (AChR) epsilon subunit gene in patients with sporadic or autosomal recessive congenital myasthenic syndromes (CMS). BACKGROUND: The nicotinic AChR of skeletal muscle is a neurotransmitter-gated ion channel that mediates synaptic transmission at the vertebrate neuromuscular junction. Mutations in its gene may cause congenital myasthenic sy…	Case series	13	CHRNE	Congenital myasthenic syndrome due to primary acetylcholine receptor deficiency caused by pathogenic variants in CHRNE	608931: Myasthenic syndrome, congenital, 4c, associated with acetylcholine receptor deficiency; CMS4c	ε1267delG	AR homozygous	Acetylcholinesterase inhibitors	Positive	N/A	N/A	N/A	N/A	N/A	N/A
191	10514102	1999	Croxen, R., Newland, C., Betty, M., Vincent, A., Newsom-Davis, J. and Beeson, D.	Novel functional epsilon-subunit polypeptide generated by a single nucleotide deletion in acetylcholine receptor deficiency congenital myasthenic syndrome	Ann Neurol	Acetylcholine receptor (AChR) deficiency is a recessively inherited congenital myasthenic syndrome in which fatigable muscle weakness results from impaired neuromuscular transmission caused by reduced AChR numbers. In mature muscle, AChRs consist of alpha2 betadelta together with the adult-specific epsilon subunit. We have identified a deletion of the first nucleotide in exon 12 of the AChR epsil…	Case series	6	CHRNE	Congenital myasthenic syndrome due to primary acetylcholine receptor deficiency caused by pathogenic variants in CHRNE	608931: Myasthenic syndrome, congenital, 4c, associated with acetylcholine receptor deficiency; CMS4c	ε1267delG	AR homozygous	Acetylcholinesterase inhibitors	Positive	N/A	N/A	N/A	N/A	N/A	N/A
192	10211467	1999	Nichols, P., Croxen, R., Vincent, A., Rutter, R., Hutchinson, M., Newsom-Davis, J. and Beeson, D.	Mutation of the acetylcholine receptor epsilon-subunit promoter in congenital myasthenic syndrome	Ann Neurol	Congenital myasthenic syndrome comprises a heterogeneous group of inherited disorders of neuromuscular transmission. Acetylcholine receptor (AChR) deficiency is the most common form of congenital myasthenic syndrome and in most cases results from mutations within the coding region of the AChR epsilon subunit. However, studies in mice have established that synapse-specific expression of AChR is de…	Familial case report	2	CHRNE	Congenital myasthenic syndrome due to primary acetylcholine receptor deficiency caused by pathogenic variants in CHRNE	608931: Myasthenic syndrome, congenital, 4c, associated with acetylcholine receptor deficiency; CMS4c	ε-156C>T	AR homozygous	Acetylcholinesterase inhibitors	Positive	N/A	N/A	N/A	N/A	N/A	N/A
193	10382905	1999	Ohno, K., Anlar, B. and Engel, A. G.	Congenital myasthenic syndrome caused by a mutation in the Ets-binding site of the promoter region of the acetylcholine receptor epsilon subunit gene	Neuromuscul Disord	Forty-two missense, truncation, or splice-site mutations of the acetylcholine receptor (AChR) subunit genes have been reported to date in patients with congenital myasthenic syndromes. Here we report a homozygous mutation, epsilon-155G --> A, in the promoter region of the AChR epsilon subunit gene that converts the Ets-binding site of the promoter region from CGGAA to CAGAA. The asymptomatic pare…	Familial case report	2	CHRNE	Congenital myasthenic syndrome due to primary acetylcholine receptor deficiency caused by pathogenic variants in CHRNE	608931: Myasthenic syndrome, congenital, 4c, associated with acetylcholine receptor deficiency; CMS4c	ε-155G > A	AR homozygous	Acetylcholinesterase inhibitors	Positive	N/A	N/A	N/A	N/A	N/A	N/A
194	10441569	1999	Ohno, K., Brengman, J. M., Felice, K. J., Cornblath, D. R. and Engel, A. G.	Congenital end-plate acetylcholinesterase deficiency caused by a nonsense mutation and an A-->G splice-donor-site mutation at position +3 of the collagenlike-tail-subunit gene (COLQ): how does G at position +3 result in aberrant splicing?	Am J Hum Genet	Congenital end-plate acetylcholinesterase (AChE) deficiency (CEAD), the cause of a disabling myasthenic syndrome, arises from defects in the COLQ gene, which encodes the AChE triple-helical collagenlike-tail subunit that anchors catalytic subunits of AChE to the synaptic basal lamina. Here we describe a patient with CEAD with a nonsense mutation (R315X) and a splice-donor-site mutation at positio…	Case report	1	COLQ	Congenital myasthenic syndrome due to endplate acetylcholinesterase deficiency caused by pathogenic variants in COLQ	603034: Myasthenic syndrome, congenital, 5; CMS5	(IVS16+3A>G) (R315X)	AR compound heterozygous	Acetylcholinesterase inhibitors	No response	N/A	N/A	N/A	N/A	N/A	N/A
195	10562302	1999	Quiram, P. A., Ohno, K., Milone, M., Patterson, M. C., Pruitt, N. J., Brengman, J. M., Sine, S. M. and Engel, A. G.	Mutation causing congenital myasthenia reveals acetylcholine receptor beta/delta subunit interaction essential for assembly	J Clin Invest	We describe a severe postsynaptic congenital myasthenic syndrome with marked endplate acetylcholine receptor (AChR) deficiency caused by 2 heteroallelic mutations in the beta subunit gene. One mutation causes skipping of exon 8, truncating the beta subunit before its M1 transmembrane domain, and abolishing surface expression of pentameric AChR. The other mutation, a 3-codon deletion (beta426delEQ…	Case report	1	CHRNB1	Congenital myasthenic syndrome due to primary acetylcholine receptor deficiency caused by pathogenic variants in CHRNB1	616314: Myasthenic syndrome, congenital, 2c, associated with acetylcholine receptor deficiency; CMS2c	β1276del9 + skipping	AR compound heterozygous	Acetylcholinesterase inhibitors	Partial	N/A	N/A	N/A	N/A	N/A	N/A
196	10195214	1999	Wang, H. L., Milone, M., Ohno, K., Shen, X. M., Tsujino, A., Batocchi, A. P., Tonali, P., Brengman, J., Engel, A. G. and Sine, S. M.	Acetylcholine receptor M3 domain: stereochemical and volume contributions to channel gating	Nat Neurosci	By defining the functional defect in a congenital myasthenic syndrome (CMS), we show that the third transmembrane domain (M3) of the muscle acetylcholine receptor governs the speed and efficiency of gating of its channel. The clinical phenotype of this CMS results from the mutation V285I in M3 of the alpha subunit, which attenuates endplate currents, accelerates their decay and causes abnormally …	Familial case report	2	CHRNA1	Fast-channel congenital myasthenic syndrome due to an acetylcholine receptor defect caused by pathogenic variants in CHRNA1	608930: Myasthenic syndrome, congenital, 1b, fast-channel; CMS1b	αV285I, αF233V	AR compound heterozygous	Acetylcholinesterase inhibitors	Positive	3,4-diaminopyridine	Positive	N/A	N/A	N/A	N/A
197	9668239	1998	Croxen, R., Beeson, D., Newland, C., Betty, M., Vincent, A. and Newsom-Davis, J.	A single nucleotide deletion in the epsilon subunit of the acetylcholine receptor (AChR) in five congenital myasthenic syndrome patients with AChR deficiency	Ann N Y Acad Sci			5	CHRNE	Congenital myasthenic syndrome due to primary acetylcholine receptor deficiency caused by pathogenic variants in CHRNE	608931: Myasthenic syndrome, congenital, 4c, associated with acetylcholine receptor deficiency; CMS4c	ε1267delG	AR homozygous	Acetylcholinesterase inhibitors	Positive	N/A	N/A	N/A	N/A	N/A	N/A
198	9668241	1998	Harper, C. M. and Engel, A. G.	Safety and efficacy of quinidine sulfate in slow-channel congenital myasthenic syndrome	Ann N Y Acad Sci	See 9546329								N/A	N/A	N/A	N/A	N/A	N/A	N/A	N/A
199	9546329	1998	Harper, C. M. and Engel, A. G.	Quinidine sulfate therapy for the slow-channel congenital myasthenic syndrome	Ann Neurol	The slow-channel congenital myasthenic syndrome (SCCMS) is caused by gain of function mutations in subunits of the end-plate acetylcholine receptor (AChR). The mutations prolong the opening episodes of the AChR channel, leading to a depolarization block and an end-plate myopathy. Because levels of quinidine sulfate attainable in clinical practice shorten the opening episodes of genetically engine…	Open-label trial	3	CHRNA1	Slow-channel congenital myasthenic syndrome due to an acetylcholine receptor defect caused by a pathogenic variant in CHRNA1	601462: Myasthenic syndrome, congenital, 1a, slow-channel; CMS1a	αN217K αG153S αV249F	AD heterozygous	Quinidine	Positive	N/A	N/A	N/A	N/A	N/A	N/A
								1	CHRNB1	Slow-channel congenital myasthenic syndrome due to an acetylcholine receptor defect caused by a pathogenic variant in CHRNB1	616313: Myasthenic syndrome, congenital, 2a, slow-channel; CMS2a	βV266M	AD heterozygous	Quinidine	Positive	N/A	N/A	N/A	N/A	N/A	N/A
								2	CHRNE	Slow-channel congenital myasthenic syndrome due to an acetylcholine receptor defect caused by a pathogenic variant in CHRNE	605809: Myasthenic syndrome, congenital, 4a, slow-channel; CMS4a	εL269F εT264P	AD heterozygous	Quinidine	Positive	N/A	N/A	N/A	N/A	N/A	N/A
200	9668237	1998	Milone, M., Ohno, K., Fukudome, T., Shen, X. M., Brengman, J., Griggs, R. C. and Engel, A. G.	Congenital myasthenic syndrome caused by novel loss-of-function mutations in the human AChR epsilon subunit gene	Ann N Y Acad Sci		Familial case report	3	CHRNE	Congenital myasthenic syndrome due to primary acetylcholine receptor deficiency caused by pathogenic variants in CHRNE	608931: Myasthenic syndrome, congenital, 4c, associated with acetylcholine receptor deficiency; CMS4c	ε382T>A (εC128S) ε1254ins18	AR compound heterozygous	Acetylcholinesterase inhibitors	Partial	N/A	N/A	N/A	N/A	N/A	N/A
201	9708546	1998	Ohno, K., Anlar, B., Ozdirim, E., Brengman, J. M., DeBleecker, J. L. and Engel, A. G.	Myasthenic syndromes in Turkish kinships due to mutations in the acetylcholine receptor	Ann Neurol	We report and functionally characterize five new mutations of the acetylcholine receptor (AChR) in 11 Turkish patients with recessive congenital myasthenic syndromes (CMS) belonging to six families. All mutations are in the epsilon-subunit gene. Parental consanguinity is present in three families. The disease cosegregates with homozygous mutations in five families and with two different heteroall…	Case series	11	CHRNE	Congenital myasthenic syndrome due to primary acetylcholine receptor deficiency caused by pathogenic variants in CHRNE	608931: Myasthenic syndrome, congenital, 4c, associated with acetylcholine receptor deficiency; CMS4c	ε1206ins19 ε70insG εIVS7+2T>C ε1276delG	AR homozygous and compound heterozygous	Acetylcholinesterase inhibitors	Partial	N/A	N/A	N/A	N/A	N/A	N/A
202	9668238	1998	Ohno, K., Anlar, B., Ozdirim, E., Brengman, J. M. and Engel, A. G.	Frameshifting and splice-site mutations in the acetylcholine receptor epsilon subunit gene in three Turkish kinships with congenital myasthenic syndromes	Ann N Y Acad Sci	See 9708546	Case series	11	CHRNE	Congenital myasthenic syndrome due to primary acetylcholine receptor deficiency caused by pathogenic variants in CHRNE	608931: Myasthenic syndrome, congenital, 4c, associated with acetylcholine receptor deficiency; CMS4c	ε1206ins19 ε70insG εIVS7+2T>C ε1276delG	AR homozygous and compound heterozygous			N/A	N/A	N/A	N/A	N/A	N/A
203	9158151	1997	Croxen, R., Newland, C., Beeson, D., Oosterhuis, H., Chauplannaz, G., Vincent, A. and Newsom-Davis, J.	Mutations in different functional domains of the human muscle acetylcholine receptor alpha subunit in patients with the slow-channel congenital myasthenic syndrome	Hum Mol Genet	Congenital myasthenic syndromes are a group of rare genetic disorders that compromise neuromuscular transmission. A subset of these disorders, the slow-channel congenital myasthenic syndrome (SCCMS), is dominantly inherited and has been shown to involve mutations within the muscle acetylcholine receptor (AChR). We have identified three new SCCMS mutations and a further familial case of the alpha …	Case series	4	CHRNA1	Slow-channel congenital myasthenic syndrome due to an acetylcholine receptor defect caused by a pathogenic variant in CHRNA1	601462: Myasthenic syndrome, congenital, 1a, slow-channel; CMS1a	αV156M αT254I αS269I αG153S	AD heterozygous	Acetylcholinesterase inhibitors	Negative	N/A	N/A	N/A	N/A	N/A	N/A
204	9158150	1997	Ohno, K., Quiram, P. A., Milone, M., Wang, H. L., Harper, M. C., Pruitt, J. N., 2nd, Brengman, J. M., Pao, L., Fischbeck, K. H., Crawford, T. O., Sine, S. M. and Engel, A. G.	Congenital myasthenic syndromes due to heteroallelic nonsense/missense mutations in the acetylcholine receptor epsilon subunit gene: identification and functional characterization of six new mutations	Hum Mol Genet	We describe and functionally characterize six mutations of the acetylcholine receptor (AChR) epsilon subunit gene in three congenital myasthenic syndrome patients. Endplate studies demonstrated severe endplate AChR deficiency, dispersed endplate regions and well preserved junctional folds in all three patients. Electrophysiologic studies were consistent with expression of the fetal gamma-AChR at …	Case series	3	CHRNE	Congenital myasthenic syndrome due to primary acetylcholine receptor deficiency caused by pathogenic variants in CHRNE	608931: Myasthenic syndrome, congenital, 4c, associated with acetylcholine receptor deficiency; CMS4c	εC190T (εR64X) εG440T (εR147L) ε127ins5 εC734T (εP245L) ε553del7 εC931T (εR311W)	AR compound heterozygous	Acetylcholinesterase inhibitors	Partial	N/A	N/A	N/A	N/A	N/A	N/A
205	8957026	1996	Engel, A. G., Ohno, K., Bouzat, C., Sine, S. M. and Griggs, R. C.	End-plate acetylcholine receptor deficiency due to nonsense mutations in the epsilon subunit	Ann Neurol	We describe a congenital myasthenic syndrome associated with severe end-plate (EP) acetylcholine receptor (AChR) deficiency not associated with an EP myopathy, and with evidence of immature AChR, containing the gamma instead of the epsilon subunit (gamma-AChR) at the EPs. Molecular genetic analysis of AChR-subunit genes revealed two mutations in the epsilon-subunit gene: insertion of a thymine af…	Case report	1	CHRNE	Congenital myasthenic syndrome due to primary acetylcholine receptor deficiency caused by pathogenic variants in CHRNE	608931: Myasthenic syndrome, congenital, 4c, associated with acetylcholine receptor deficiency; CMS4c	ε1101insT ε1293insG	AR compound heterozygous	Pyridostigmine	Positive	N/A	N/A	N/A	N/A	N/A	N/A
206	8651643	1996	Gomez, C. M., Maselli, R., Gammack, J., Lasalde, J., Tamamizu, S., Cornblath, D. R., Lehar, M., McNamee, M. and Kuncl, R. W.	A beta-subunit mutation in the acetylcholine receptor channel gate causes severe slow-channel syndrome	Ann Neurol	Point mutations in the genes encoding the acetylcholine receptor (AChR) subunits have been recognized in some patients with slow-channel congenital myasthenic syndromes (CMS). Clinical, electrophysiological, and pathological differences between these patients may be due to the distinct effects of individual mutations. We report that a spontaneous mutation of the beta subunit that interrupts the l…	Case report	1	CHRNB1	Slow-channel congenital myasthenic syndrome due to an acetylcholine receptor defect caused by a pathogenic variant in CHRNB1	616313: Myasthenic syndrome, congenital, 2a, slow-channel; CMS2a	L263M	AD heterozygous	Pyridostigmine	No response	N/A	N/A	N/A	N/A	N/A	N/A
207	8755487	1996	Ohno, K., Wang, H. L., Milone, M., Bren, N., Brengman, J. M., Nakano, S., Quiram, P., Pruitt, J. N., Sine, S. M. and Engel, A. G.	Congenital myasthenic syndrome caused by decreased agonist binding affinity due to a mutation in the acetylcholine receptor epsilon subunit	Neuron	We describe the genetic and kinetic defects for a low-affinity fast channel disease of the acetylcholine receptor (AChR) that causes a myasthenic syndrome. In two unrelated patients with very small miniature end plate (EP) potentials, but with normal EP AChR density and normal EP ultrastructure, patch-clamp studies demonstrated infrequent AChR channel events, diminished channel reopenings during …	Case series	2	CHRNE	Fast-channel congenital myasthenic syndrome due to an acetylcholine receptor defect caused by pathogenic variants in CHRNE	616324: Myasthenic syndrome, congenital, 4b, fast-channel; CMS4b	εP121L, εG-8R εP121L, εS143L	AR compound heterozygous	Acetylcholinesterase inhibitors	Partial	N/A	N/A	N/A	N/A	N/A	N/A

## Sheet: Case reports wo variant data
No.	PMID	Year	Authors	Title	Journal	Abstract	Type of study	Number of patients	Gene
1	25349186	2014	McElnea, E. M., Stephenson, K., Lanigan, B. and Flitcroft, I.	An ocular motility conundrum	BMJ Case Rep	Two siblings, an 11-year-old boy and a 7-year-old girl presented with bilateral symmetrical ptosis and limited eye movements. Having already been reviewed on a number of occasions by a variety of specialists in multiple hospital settings a diagnosis of their ocular motility disorder had remained elusive. We describe their cases, outline the differential diagnosis and review the investigations per…	Familial case report	2 sibs	Unknown
2	23956565	2013	Azad, Z. R., Sivadasan, A., Alexander, M. and Patil, A. K.	Efficacy of terbutaline in familial limb girdle myasthenia: Case report and review of literature	Ann Indian Acad Neurol	Congenital myasthenic syndromes (CMS) are frequently misdiagnosed due to their wide clinical heterogeneity. Molecular defects in various end-plate associated proteins are being identified. Better understanding of the molecular pathogenesis and genotype-phenotype correlations can help evolve newer therapeutic targets. We present a report of two siblings with familial limb girdle myasthenia who sho…	Case series	2	Unknown
3	23703054	2013	Romaneli, M. T., Castro, C. C., Fraga Ade, M., Lomazi, E. A., Nucci, A. and Tresoldi, A. T.	Recurrent apparent life-threatening event as the first manifestation of congenital myasthenia	Rev Paul Pediatr	OBJECTIVE: To alert pediatricians about the importance of a careful investigation on recurrent apparent life-threatening events. Reports of the association of these events with congenital myasthenic syndromes were not found. CASE DESCRIPTION: A seven-month-old infant with recurrent apparent life-threatening events was admitted for investigation. During hospital stay, she presented cyanosis and re…	Case report	1	Unknown
4	17070490	2006	Brodsky, M. C.	Myasthenic ptosis with synkinetic override in a child with congenital oculomotor nerve palsy	J AAPOS		Case report	1	Unknown
5	16525123	2006	Milone, M., Fukuda, T., Shen, X. M., Tsujino, A., Brengman, J. and Engel, A. G.	Novel congenital myasthenic syndromes associated with defects in quantal release	Neurology	BACKGROUND: Most congenital myasthenic syndromes are caused by defects in postsynaptic or synaptic basal lamina-associated proteins; congenital myasthenic syndromes (CMSs) associated with presynaptic defects are uncommon. Here, the authors describe clinical, electrophysiologic, and morphologic features of two novel and highly disabling CMSs, one determined by presynaptic and the other determined …	Case series	2	Unknown
6	16870884	2006	Slater, C. R., Fawcett, P. R., Walls, T. J., Lyons, P. R., Bailey, S. J., Beeson, D., Young, C. and Gardner-Medwin, D.	Pre- and post-synaptic abnormalities associated with impaired neuromuscular transmission in a group of patients with 'limb-girdle myasthenia'	Brain	The properties of neuromuscular junctions (NMJs) were studied in motor-point biopsy samples from eight patients with congenital myasthenic syndromes affecting primarily proximal limb muscles ['limb-girdle myasthenia' (LGM)]. All had moderate to severe weakness of the proximal muscles, without short-term clinical fatigability but with marked variation in strength over periods of weeks or months, w…	Case series	8	Unknown
7	14729415	2004	Zafeiriou, D. I., Pitt, M. and de Sousa, C.	Clinical and neurophysiological characteristics of congenital myasthenic syndromes presenting in early infancy	Brain Dev	The congenital myasthenic syndromes (CMS) constitute a group of genetic disorders, which affect neuromuscular transmission, presenting usually within the first years of life and with a clinical spectrum ranging from mild muscle weakness to severe disability with life-threatening episodes. We present clinical and neurophysiological data of 11 patients (four males, seven females) with CMS diagnosed…	Case series	11	Unknown
8	12467753	2002	Rodolico, C., Toscano, A., Autunno, M., Messina, S., Nicolosi, C., Aguennouz, M., Laura, M., Girlanda, P., Messina, C. and Vita, G.	Limb-girdle myasthenia: clinical, electrophysiological and morphological features in familial and autoimmune cases	Neuromuscul Disord	Limb-girdle myasthenia is an uncommon disease and includes familial and autoimmune forms. Patients present proximal muscle weakness and wasting, and sometimes fatigability, without cranial nerve involvement and fluctuations. We observed, during a 15-year period, nine subjects with limb-girdle myasthenia, (24-55 years; 8 males, 1 female) who constituted 3.2% of 281 myasthenic patients attending ou…	Case series	5	Unknown
9	12577107	2002	Shankar, A., Solomon, T., Joseph, T. P. and Gnanamuthu, C.	Autosomal recessive limb girdle myasthenia in two sisters	Neurol India	Limb girdle myasthenic syndromes are rare genetic disorders described under the broad heterogeneous group known as congenital myasthenic syndromes and present with mixed features of myasthenia and myopathy. The familial limb girdle myasthenia has been described as one with selective weakness of pectoral and pelvic girdles, showing a positive response to edrophonium chloride. A report of two siste…	Familial case report	2 sibs	Unknown
10	11468313	2001	Maselli, R. A., Kong, D. Z., Bowe, C. M., McDonald, C. M., Ellis, W. G., Agius, M. A., Gomez, C. M., Richman, D. P. and Wollmann, R. L.	Presynaptic congenital myasthenic syndrome due to quantal release deficiency	Neurology	OBJECTIVE: To provide clinical, electrophysiologic, and ultrastructural findings in three patients with a presynaptic congenital myasthenic syndrome (CMS). BACKGROUND: Familial infantile myasthenia and paucity of synaptic vesicles are the only two fully characterized CMS. We are describing here three patients with another form of presynaptic CMS characterized by deficiency of the action potential…	Case series	3	Unknown
11	10883011	2000	Iannaccone, S. T., Mills, J. K., Harris, K. M., Herman, J. H., Schochet, P. and Luckett, P.	Congenital myasthenic syndrome with sleep hypoventilation	Muscle Nerve	We report the case of a 13-year-old boy with acetylcholinesterase deficiency, a congenital myasthenic syndrome, who developed sleep hypoventilation syndrome during a period of rapid growth. His symptoms were insidious and life-threatening despite changes in strength or lung volume measurements that were not marked. He responded well to noninvasive nocturnal ventilation, with reversal of symptoms …	Case report	1	Unknown
12	11025633	2000	Khwaja, G. A., Chowdhury, D. and Gupta, M.	Congenital myasthenic syndrome: report of four cases and brief review of literature	Neurol India	The term 'congenital myasthenic syndrome' (CMS) encompasses a number of heterogeneous disorders characterised by myasthenic symptoms since birth, usually with positive family history and absence of acetyl choline receptor antibodies. Recent advances in electrophysiology and ultrastructural analysis of neuromuscular junction have made it possible to identify the various defects underlying these di…	Case series	4	Unknown
13	10701044	2000	McConkey, P. P. and Mullens, A. J.	Congenital myasthenic syndrome: a rare, potentially treatable cause of respiratory failure in a "floppy" infant	Anaesth Intensive Care	A four-month-old infant, thought to suffer from cerebral palsy, presented with respiratory failure on the background of a gradually deteriorating general level of function. Whilst being ventilated in intensive care he was noted to have severe muscle weakness. A disorder of the neuromuscular junction was suspected and he was subsequently demonstrated to have a congenital myasthenic syndrome. Antic…	Case report	1	Unknown
14	10711889	2000	Mullaney, P., Vajsar, J., Smith, R. and Buncic, J. R.	The natural history and ophthalmic involvement in childhood myasthenia gravis at the hospital for sick children	Ophthalmology	OBJECTIVE: To characterize signs, symptoms, and the natural history of myasthenic syndromes in pediatric patients. DESIGN: Retrospective noncomparative case series. PARTICIPANTS: Thirty-four patients with a diagnosis of myasthenia were identified from either the hospital's or treating physician's database. METHODS: Retrospective chart review, clinical examination, and telephone interview. MAIN OU…	Case series/ retrospective review	7	Unknown
15	10446808	1999	Banwell, B. L., Russel, J., Fukudome, T., Shen, X. M., Stilling, G. and Engel, A. G.	Myopathy, myasthenic syndrome, and epidermolysis bullosa simplex due to plectin deficiency	J Neuropathol Exp Neurol	Plectin, an intermediate filament linking protein, is normally associated with the sarcolemma, nuclear membrane, and intermyofibrillar network in muscle, and with hemisdesmosomes in skin. A 20-year-old female with epidermolysis bullosa simplex since birth had progressive ocular, facial, limb, and trunkal weakness and fatigability since age 9, fivefold CK elevation, a 25% decrement with myopathic …	Case report	1	Unknown
16	9813454	1998	Menold, M. M., Sadeh, M., Lennon, F., Blatt, I., Goldhammer, Y., Yamaoka, L. H., Vance, J. M. and Pericak-Vance, M. A.	Evidence for genetic heterogeneity supports clinical differences in congenital myasthenic syndromes	Hum Hered	Congenital myasthenic syndromes (CMS) define a diverse group of disorders, all of which compromise neuromuscular transmission. Symptoms can be present at birth or appear during childhood, and can range in severity. Both autosomal dominant and recessive forms exist, and a number of clinical subtypes have been described. The cause of many cases of CMS has been traced to mutations in the genes for t…	Case series	6	Unknown
17	9443457	1998	Sieb, J. P., Dorfler, P., Tzartos, S., Wewer, U. M., Ruegg, M. A., Meyer, D., Baumann, I., Lindemuth, R., Jakschik, J. and Ries, F.	Congenital myasthenic syndromes in two kinships with end-plate acetylcholine receptor and utrophin deficiency	Neurology	We studied two families with five affected members suffering from ptosis and slowly progressive limb-girdle muscle weakness. All patients had abnormal decremental response on low-frequency nerve stimulation, but there were no repetitive responses to single stimuli. The patients improved on anti-acetylcholinesterase drugs. Intercostal muscle was obtained for special studies from one patient of eac…	Case series	5	Unknown
18	9120223	1996	Anlar, B., Varli, K., Ozdirim, E. and Ertan, M.	3,4-diaminopyridine in childhood myasthenia: double-blind, placebo-controlled trial	J Child Neurol	Eleven patients with congenital and five with juvenile myasthenia gravis, aged 5 to 24 years, were given 3,4-diaminopyridine in a double-blind, placebo-controlled, crossover study. Clinical improvement was observed in 5 of 11 congenital myasthenia patients, and placebo effect, in 3 of 11. Juvenile myasthenia patients did not respond. Single-fiber electromyographic studies did not reveal any chang…	Double-blind placebo-controlled crossover trial	11	Unknown
19	8664562	1996	Sieb, J. P., Tolksdorf, K., Dengler, R. and Jerusalem, F.	An autosomal-recessive congenital myasthenic syndrome with tubular aggregates in a Libyan family	Neuromuscul Disord	We studied a Libyan family in which five out of seven siblings have had slowly progressive limb-girdle weakness accentuated by exercise since childhood. Ptosis or ophthalmoplegia were not observed. Pronounced decremental electromyographic responses on 3 Hz stimulation indicated the presence of a defect of neuromuscular transmission. Repeated testing for acetylcholine receptor antibodies was negat…	Familial case report	5 sibs	Unknown
20	7619191	1995	Vajsar, J., Sloane, A., MacGregor, D. L., Ronen, G. M., Becker, L. E. and Jay, V.	Arthrogryposis multiplex congenita due to congenital myasthenic syndrome	Pediatr Neurol	Two children, now 5 1/2 and 6 years of age, presented as neonates with hypotonia, multiple joint contractures, ptosis, extraocular weakness, bulbar symptoms, and respiratory distress. Fluctuations and episodic exacerbations of weakness necessitated respiratory support. Both children are developmentally delayed and cannot walk independently, although one child underwent bilateral tenotomies. Bioch…	Case series	2	Unknown
21	7851676	1995	Young, J. A.	An unusual myasthenic syndrome developing in children who presented with infantile myopathy with type I fibre-specific hypertrophy	Dev Med Child Neurol		Case series	2	Unknown
22	8232383	1993	Engel, A. G., Nagel, A., Walls, T. J., Harper, C. M. and Waisburg, H. A.	Congenital myasthenic syndromes: I. Deficiency and short open-time of the acetylcholine receptor	Muscle Nerve	A 5.5-year-old girl had myasthenic symptoms since birth. Tests for antiacetylcholine receptor (AChR) antibodies were negative. To investigate the character of the neuromuscular transmission defect, an intercostal muscle specimen was obtained at age 27 months. Immune deposits were absent from the endplates. On electron microscopy, most postsynaptic regions appeared normal, but the density of AChR …	Case report	1	Unknown
23	7685992	1993	Engel, A. G., Uchitel, O. D., Walls, T. J., Nagel, A., Harper, C. M. and Bodensteiner, J.	Newly recognized congenital myasthenic syndrome associated with high conductance and fast closure of the acetylcholine receptor channel	Ann Neurol	We describe here a new congenital myasthenic syndrome associated with a kinetic abnormality of the acetylcholine receptor (AChR) channel. The propositus had poor suck and cry after birth. Subsequently, she had intermittent ocular symptoms and fatigued abnormally on exertion. At age 9 years, significant weakness was detected only in the frontalis, levator palpebrae, and neck flexor muscles. Electr…	Familial case report	2 sibs	Unknown
24	8232384	1993	Uchitel, O., Engel, A. G., Walls, T. J., Nagel, A., Atassi, M. Z. and Bril, V.	Congenital myasthenic syndromes: II. Syndrome attributed to abnormal interaction of acetylcholine with its receptor	Muscle Nerve	A 21-year-old woman had myasthenic symptoms since birth that responded poorly to anticholinesterase therapy. Tests for acetylcholine receptor (AChR) antibodies were negative. An intercostal muscle specimen was obtained to investigate the character of the neuromuscular transmission defect. There were no immune deposits at the endplates. The quantal content of the endplate potential was normal. Min…	Case report	1	Unknown
25	8357189	1993	Uchitel, O., Engel, A. G., Walls, T. J., Nagel, A., Bril, V. and Trastek, V. F.	Congenital myasthenic syndrome attributed to an abnormal interaction of acetylcholine with its receptor	Ann N Y Acad Sci		Case report	1	Unknown
26	7689312	1993	Vincent, A., Newsom-Davis, J., Wray, D., Shillito, P., Harrison, J., Betty, M., Beeson, D., Mills, K., Palace, J., Molenaar, P. and et al.	Clinical and experimental observations in patients with congenital myasthenic syndromes	Ann N Y Acad Sci		Case series	22	Unknown
27	8395161	1993	Walls, T. J., Engel, A. G., Nagel, A. S., Harper, C. M. and Trastek, V. F.	Congenital myasthenic syndrome associated with paucity of synaptic vesicles and reduced quantal release	Ann N Y Acad Sci		Case report	1	Unknown
28	1732764	1992	Jennekens, F. G., Hesselmans, L. F., Veldman, H., Jansen, E. N., Spaans, F. and Molenaar, P. C.	Deficiency of acetylcholine receptors in a case of end-plate acetylcholinesterase deficiency: a histochemical investigation	Muscle Nerve	A young boy is described who, since early infancy, suffered from weakness of predominantly proximal limb muscles. Electromyography revealed impairment of neuromuscular transmission. There were no antibodies against acetylcholine receptors. The amplitude of miniature end-plate potentials was reduced. Neuromuscular junctions showed somewhat coarse postsynaptic junctional folds and degeneration prod…	Case report	1	Unknown
29	1313543	1992	Triggs, W. J., Beric, A., Butler, I. J. and Roongta, S. M.	A congenital myasthenic syndrome refractory to acetylcholinesterase inhibitors	Muscle Nerve	We studied 4 siblings (3 men and 1 woman), ages 22 to 43 years, with congenital ptosis, external ophthalmoplegia, proximal muscle weakness and fatigability unresponsive to acetylcholinesterase (AChE) inhibitors. Repetitive nerve stimulation showed a significant compound muscle action potential (CMAP) area decrement at 2 or 3 Hz. Nerve conduction studies and concentric needle electromyography were…	Familial case report	4 sibs	Unknown
30	1783919	1991	Palace, J., Wiles, C. M. and Newsom-Davis, J.	3,4-Diaminopyridine in the treatment of congenital (hereditary) myasthenia	J Neurol Neurosurg Psychiatry	Congenital or hereditary myasthenia describes a heterogeneous group of disorders in which the immune system is not implicated. Treatment has previously depended on anticholinesterase medication. The effectiveness of 3,4-diaminopyridine (3,4-DAP), a preparation that enhances acetylcholine release from motor nerve terminals, has been evaluated using a series of standardised strength measures. Sixte…	Open-label trial and double-blind crossover trial	16 and 4	Unknown
31	2245297	1990	Goldhammer, Y., Blatt, I., Sadeh, M. and Goodman, R. M.	Congenital myasthenia associated with facial malformations in Iraqi and Iranian Jews. A new genetic syndrome	Brain	Fourteen Jewish patients from 10 families of either Iraqi or Iranian origin with congenital myasthenia had associated facial malformations which included an elongated face, mandibular prognathism with class III malocclusion and a high-arched palate. Other common features were muscle weakness restricted predominantly to ptosis, weakness of facial and masticatory muscles, and fatigable speech; mild…	Case series	14	Unknown
32	2709065	1989	Nishida, Y., Kobayashi, T., Machi, M., Yamada, T., Kitaguchi, T., Oda, K. and Goto, I.	Congenital myopathy with myasthenic features and congenital cataract in two siblings	J Neurol	Two siblings with congenital myopathy showing myasthenic manifestations together with congenital cataract are reported. Their muscle weakness fluctuated and was alleviated by edrophonium chloride. Their serum creatine kinase activity was elevated, and the waning phenomenon was observed on repetitive nerve stimulation. Biopsied muscle showed degenerative changes with type 1 fibre predominance and …	Familial case report	2	Unknown
33	3398881	1988	Smit, L. M., Hageman, G., Veldman, H., Molenaar, P. C., Oen, B. S. and Jennekens, F. G.	A myasthenic syndrome with congenital paucity of secondary synaptic clefts: CPSC syndrome	Muscle Nerve	Two cases of a newly recognized myasthenic syndrome were investigated (CPSC syndrome). The course of the disease was observed for periods of 6 and 3 years. In infancy, exacerbations of the symptoms occurred during febrile illness, but thereafter the clinical course was stable and the children appeared to be only slightly handicapped. Biopsies were taken from the intercostal muscle in both patient…	Case series	2	Unknown
34	3035103	1987	Bady, B., Chauplannaz, G. and Carrier, H.	Congenital Lambert-Eaton myasthenic syndrome	J Neurol Neurosurg Psychiatry	A 4 year old girl had been hypotonic and areflexic since birth with delayed milestones in motor development. Repetitive stimulation at high rates performed at 3 years elicited an incremental response typical of the Lambert-Eaton Syndrome.	Case report	1	Unknown
35	3479930	1987	Smit, L. M., Veldman, H., Jennekens, F. G., Molenaar, P. C. and Oen, B. S.	A congenital myasthenic disorder with paucity of secondary synaptic clefts: deficiency and altered distribution of acetylcholine receptors	Ann N Y Acad Sci	Congenital myasthenia (CM) constitutes a heterogeneous group of disorders with different underlying defects. The authors investigated a case of CM, presenting with congenital contractures. Endplate studies in the first year of life showed a developmental disorder of postsynaptic membranes. Clinical follow-up demonstrated a beneficial effect of pyridostigmine, resulting in normal motor development…	Case report	1	Unknown
36	3010100	1986	Lecky, B. R., Morgan-Hughes, J. A., Murray, N. M., Landon, D. N., Wray, D. and Prior, C.	Congenital myasthenia: further evidence of disease heterogeneity	Muscle Nerve	The findings in two cases of congenital myasthenia investigated by intercostal muscle biopsy are presented. The first case, a 16-year-old boy, showed reduced miniature endplate potential amplitude and normal 125I-alpha-bungarotoxin binding to postsynaptic acetylcholine receptors. Muscle biopsy and endplate ultrastructure were normal. Tubocurarine affinity, ion channel properties, and passive memb…	Case series	2	Unknown
37	4057112	1985	Joshi, R. M., Bharucha, B. A., Mohire, M. D. and Kumta, N. B.	Congenital myasthenia gravis (a case report)	J Postgrad Med		Case report	1	Unknown
38	6087719	1984	Albers, J. W., Faulkner, J. A., Dorovini-Zis, K., Barald, K. F., Must, R. E. and Ball, R. D.	Abnormal neuromuscular transmission in an infantile myasthenic syndrome	Ann Neurol	A term infant required intubation for respiratory depression. Examination revealed hypotonia and areflexia with intact extraocular movements. Electrodiagnostic studies demonstrated defective neuromuscular transmission characterized by borderline low motor evoked amplitudes, profound decremental responses at all stimulation rates, and moderate facilitation (50 to 740%) 15 seconds after 5 seconds o…	Case report	1	Unknown
39	6840138	1983	Alberca, R., Gil-Peralta, A., Castilla, J. M., Rafel, E. and Bautista, J.	Facilitating myasthenic syndrome and quadriceps myopathy	Eur Neurol	A patient presented with myasthenic syndrome apparently not related to any neoplasia. A peculiar myopathy characterized by absolute predominance (99.50%) and atrophy of type 2A muscle fibers was found in both quadriceps muscles. It is difficult to determine the relation between the myasthenic syndrome and the localized quadriceps myopathy for which a congenital nature is suggested.	Case report	1	Unknown
40	6287911	1982	Engel, A. G., Lambert, E. H., Mulder, D. M., Torres, C. F., Sahashi, K., Bertorini, T. E. and Whitaker, J. N.	A newly recognized congenital myasthenic syndrome attributed to a prolonged open time of the acetylcholine-induced ion channel	Ann Neurol	Five familial cases (in two families) and one sporadic case of a new congenital myasthenic syndrome were investigated. Symptoms arise in infancy or later life. Typically, one finds selective involvement of cervical, scapular, and finger extensor muscles, ophthalmoparesis, and variable involvement of other muscles. There is a repetitive muscle action potential to single nerve stimulus in all muscl…	Case series	6	Unknown
41	6259555	1981	Murray, N. M. and Newsom-Davis, J.	Treatment with oral 4-aminopyridine in disorders of neuromuscular transmission	Neurology	Four patients with Eaton-Lambert syndrome, four patients with congenital myasthenia, and one patient with myasthenia gravis were treated with oral 4-aminopyridine for periods of up to 10 months, doses varying from 40 to 200 mg per day. Clinical and electrophysiologic assessment confirmed the effectiveness of the drug when given alone or in conjunction with anticholinesterases. At therapeutically …	Open-label trial	4	Unknown
42	6446471	1980	Smit, L. M. and Barth, P. G.	Arthrogryposis multiplex congenita due to congenital myasthenia	Dev Med Child Neurol	Decreased fetal movements may cause arthrogryposis multiplex congenita. Several distinct neuromuscular disorders may cause this syndrome, but congenital myasthenia has not previously been considered to be a possible cause. The authors report a case of congenital myasthenia gravis leading to arthrogryposis congenita.	Case report	1	Unknown

## Sheet: Reviews
No.	PMID	Year	Authors	Title	Journal	Abstract
1	29783273	2018	Arican, P., Gencpinar, P., Cavusoglu, D. and Olgac Dundar, N.	Clinical and Genetic Features of Congenital Myasthenic Syndromes due to CHAT Mutations: Case Report and Literature Review	Neuropediatrics	Congenital myasthenic syndromes (CMS) are neuromuscular transmission disorders caused by mutations in genes encoding neuromuscular junction proteins. CMS due to choline acetyltransferase (CHAT) gene is characterized by episodic apnea. We report a case of a 12-month-old female patient presented with recurrent episodic apnea carrying a mutation in CHAT gene, p.I336T. Furthermore, we describe the ge…
2	28889642	2018	Dowling, J. J., H, D. Gonorazky, Cohn, R. D. and Campbell, C.	Treating pediatric neuromuscular disorders: The future is now	Am J Med Genet A	Pediatric neuromuscular diseases encompass all disorders with onset in childhood and where the primary area of pathology is in the peripheral nervous system. These conditions are largely genetic in etiology, and only those with a genetic underpinning will be presented in this review. This includes disorders of the anterior horn cell (e.g., spinal muscular atrophy), peripheral nerve (e.g., Charcot…
3	29892917	2018	Engel, A. G.	Congenital Myasthenic Syndromes in 2018	Curr Neurol Neurosci Rep	PURPOSE OF REVIEW: Summarize features of the currently recognized congenital myasthenic syndromes (CMS) with emphasis on novel findings identified in the past 6 years. RECENT FINDINGS: Since the last review of the CMS in this journal in 2012, several novel CMS were identified. The identified disease proteins are SNAP25B, synaptotagmin 2, Munc13-1, synaptobrevin-1, GFPT1, DPAGT1, ALG2, ALG14, Agri…
4	29478601	2018	Engel, A. G.	Genetic basis and phenotypic features of congenital myasthenic syndromes	Handb Clin Neurol	The congenital myasthenic syndromes (CMS) are heterogeneous disorders in which the safety margin of neuromuscular transmission is compromised by one or more specific mechanisms. The disease proteins reside in the nerve terminal, the synaptic basal lamina, or in the postsynaptic region, or at multiple sites at the neuromuscular junction as well as in other tissues. Targeted mutation analysis by Sa…
5	29355968	2018	Engel, A. G., Shen, X. M. and Selcen, D.	The unfolding landscape of the congenital myasthenic syndromes	Ann N Y Acad Sci	Congenital myasthenic syndromes (CMS) are heterogeneous disorders in which the safety margin of neuromuscular transmission is impaired by one or more specific mechanisms. Since the advent of next-generation sequencing methods, the discovery of novel CMS targets and phenotypes has proceeded at an accelerated rate. Here, we review the current classification of CMS and describe our findings in five …
6	29381222	2018	Lee, M., Beeson, D. and Palace, J.	Therapeutic strategies for congenital myasthenic syndromes	Ann N Y Acad Sci	To date, more than 25 genes have been implicated in the etiology of the congenital myasthenic syndromes (CMS), and an ever-growing phenotypic landscape is now encountered in the CMS clinic. Unlike the autoimmune form of myasthenia, there is no role for immunomodulatory agents in the treatment of CMS. The present-day drug repertoire comprises acetylcholinesterase inhibitors (mainly pyridostigmine)…
7	29696584	2018	Lorenzoni, P. J., Scola, R. H., Kay, C. S. K., Werneck, L. C., Horvath, R. and Lochmuller, H.	How to Spot Congenital Myasthenic Syndromes Resembling the Lambert-Eaton Myasthenic Syndrome? A Brief Review of Clinical, Electrophysiological, and Genetics Features	Neuromolecular Med	Congenital myasthenic syndromes (CMS) are heterogeneous genetic diseases in which neuromuscular transmission is compromised. CMS resembling the Lambert-Eaton myasthenic syndrome (CMS-LEMS) are emerging as a rare group of distinct presynaptic CMS that share the same electrophysiological features. They have low compound muscular action potential amplitude that increment after brief exercise (facili…
8	29315608	2018	O'Connor, E., Topf, A., Zahedi, R. P., Spendiff, S., Cox, D., Roos, A. and Lochmuller, H.	Clinical and research strategies for limb-girdle congenital myasthenic syndromes	Ann N Y Acad Sci	Congenital myasthenic syndromes (CMS) are a group of rare disorders that cause fatigable muscle weakness due to defective signal transmission at the neuromuscular junction, a specialized synapse between peripheral motor neurons and their target muscle fibers. There are now over 30 causative genes that have been reported for CMS. Of these, there are 10 that are associated with a limb-girdle patter…
9	29874875	2018	Rodriguez Cruz, P. M., Palace, J. and Beeson, D.	The Neuromuscular Junction and Wide Heterogeneity of Congenital Myasthenic Syndromes	Int J Mol Sci	Congenital myasthenic syndromes (CMS) are genetic disorders characterised by impaired neuromuscular transmission. This review provides an overview on CMS and highlights recent advances in the field, including novel CMS causative genes and improved therapeutic strategies. CMS due to mutations in SLC5A7 and SLC18A3, impairing the synthesis and recycling of acetylcholine, have recently been describe…
10	29655455	2018	Shieh, P. B. and Oh, S. J.	Congenital Myasthenic Syndromes	Neurol Clin	The congenital myasthenic syndromes (CMS) are a group of rare genetic conditions characterized by abnormal neuromuscular transmission. Typically, these conditions have been the result of a dysfunctional protein that is present in the presynaptic terminal, the synaptic cleft, or the postsynaptic terminal. Many of these syndromes present within the first few years of life with fluctuating and fatig…
11	30032336	2018	Farmakidis, C., Pasnoor, M., Barohn, R. J. and Dimachkie, M. M.	Congenital Myasthenic Syndromes: a Clinical and Treatment Approach	Curr Treat Options Neurol	PURPOSE OF REVIEW: Congenital myasthenia syndromes are clinically and genetically heterogeneous but treatable conditions. Careful selection of drug therapy is paramount as the same drug can be effective, ineffective, and even harmful in different congenital myasthenia syndromes. The purpose of this article is to review current treatment options for these conditions. RECENT FINDINGS: Next-generati…
12	28505670	2017	McMacken, G., Abicht, A., Evangelista, T., Spendiff, S. and Lochmuller, H.	The Increasing Genetic and Phenotypical Diversity of Congenital Myasthenic Syndromes	Neuropediatrics	The congenital myasthenic syndromes (CMS) are a diverse group of diseases, which result in an increasing range of phenotypes, but which are all due to inherited defects at the neuromuscular junction (NMJ). Although some patients remain genetically undiagnosed, our ability to identify the causative genes has shed new light on the role of previous uncharacterized proteins at the NMJ. Securing the g…
13	29125502	2017	Nicole, S., Azuma, Y., Bauche, S., Eymard, B., Lochmuller, H. and Slater, C.	Congenital Myasthenic Syndromes or Inherited Disorders of Neuromuscular Transmission: Recent Discoveries and Open Questions	J Neuromuscul Dis	Congenital myasthenic syndromes (CMS) form a heterogeneous group of rare diseases characterized by fatigable muscle weakness. They are genetically-inherited and caused by defective synaptic transmission at the cholinergic neuromuscular junction (NMJ). The number of genes known to cause CMS when mutated is currently 30, and the relationship between fatigable muscle weakness and defective functions…
14	27472506	2016	Beeson, D.	Congenital myasthenic syndromes: recent advances	Curr Opin Neurol	PURPOSE OF REVIEW: Congenital myasthenic syndromes (CMS) are a group of heterogeneous inherited disorders caused by mutations in genes encoding proteins essential for the integrity of neuromuscular transmission. This review updates the reader on recent findings that have expanded the phenotypic spectrum and suggested improved treatment strategies. RECENT FINDINGS: The use of next-generation seque…
15	25895926	2015	Engel, A. G., Shen, X. M., Selcen, D. and Sine, S. M.	Congenital myasthenic syndromes: pathogenesis, diagnosis, and treatment	Lancet Neurol
16	25305004	2014	Rodriguez Cruz, P. M., Palace, J. and Beeson, D.	Inherited disorders of the neuromuscular junction: an update	J Neurol	Congenital myasthenic syndromes (CMSs) are a group of heterogeneous inherited disorders caused by mutations in genes affecting the function and structure of the neuromuscular junction. This review updates the reader on established and novel subtypes of congenital myasthenia, and the treatment strategies for these increasingly heterogeneous disorders. The discovery of mutations associated with the…
17	25159927	2014	Rodriguez Cruz, P. M., Palace, J. and Beeson, D.	Congenital myasthenic syndromes and the neuromuscular junction	Curr Opin Neurol	PURPOSE OF REVIEW: Congenital myasthenic syndromes (CMS) are a group of heterogeneous inherited disorders caused by mutations in genes encoding proteins essential for the integrity of neuromuscular transmission. This review updates the reader on the new mutations of known CMS genes, new causative genes and the treatment strategies for these increasingly heterogeneous disorders. It also provides a…
18	25118992	2014	Sharp, L. and Trivedi, J. R.	Treatment and management of neuromuscular channelopathies	Curr Treat Options Neurol	OPINION STATEMENT: Neuromuscular channelopathies are heterogeneous disorders with marked phenotypic and genotypic variability. These include non-dystrophic myotonia (NDM), periodic paralysis (PP), and congenital myasthenic syndrome (CMS). Their diverse clinical manifestations remain a challenge in diagnosis and management to this date. These disorders impact quality of life and cause lifelong dis…
19	25515947	2014	Vrinten, C., van der Zwaag, A. M., Weinreich, S. S., Scholten, R. J. and Verschuuren, J. J.	Ephedrine for myasthenia gravis, neonatal myasthenia and the congenital myasthenic syndromes	Cochrane Database Syst Rev	BACKGROUND: Myasthenia is a condition in which neuromuscular transmission is affected by antibodies against neuromuscular junction components (autoimmune myasthenia gravis, MG; and neonatal myasthenia gravis, NMG) or by defects in genes for neuromuscular junction proteins (congenital myasthenic syndromes, CMSs). Clinically, some individuals seem to benefit from treatment with ephedrine, but its e…
20	24425145	2014	Witting, N. and Vissing, J.	Pharmacologic treatment of downstream of tyrosine kinase 7 congenital myasthenic syndrome	JAMA Neurol	IMPORTANCE: Congenital myasthenic syndromes (CMSs) are increasingly recognized as causes of muscle fatigue and weakness. However, treatment of individual syndromes has been described only in small case series. OBJECTIVE: To analyze the information published thus far concerning the effect of pharmacologic treatment of one of the most common subtypes of CMS, downstream of tyrosine kinase 7 (DOK7) C…
21	24101812	2013	Jagtap, S. A., Abraham, K., Sarada, C. and Nair, M. D.	Congenital myasthenic syndromes: Natural history and long-term prognosis	Ann Indian Acad Neurol	INTRODUCTION: Congenital myasthenia syndrome (CMS) is a rare, heterogeneous group of genetically determined, disorder of neuromuscular transmission. They have a varied presentation and progression and very few studies have addressed the natural history. Aim of the present study is to describe the clinical profile and natural history of patients with CMS. MATERIALS AND METHODS: Study includes pati…
22	23622369	2013	Eymard, B., Hantai, D. and Estournet, B.	Congenital myasthenic syndromes	Handb Clin Neurol	Congenital myasthenic syndromes (CMS) are a heterogeneous group of disorders caused by genetic defects affecting neuromuscular transmission and leading to muscle weakness accentuated by exertion. The characterization of CMS comprises two complementary steps: establishing the diagnosis and identifying the pathophysiological type of CMS. The combination of clinical, electrophysiological, and morpho…
23	23468559	2013	Finlayson, S., Beeson, D. and Palace, J.	Congenital myasthenic syndromes: an update	Pract Neurol
24	23995276	2013	Hantai, D., Nicole, S. and Eymard, B.	Congenital myasthenic syndromes: an update	Curr Opin Neurol	PURPOSE OF REVIEW: Congenital myasthenic syndromes (CMSs) form a heterogeneous group of genetic diseases characterized by a dysfunction of neuromuscular transmission because of mutations in numerous genes. This review will focus on the causative genes recently identified and on the therapy of CMSs. RECENT FINDINGS: Advances in exome sequencing allowed the discovery of a new group of genes that di…
25	22864774	2013	Winter, L. and Wiche, G.	The many faces of plectin and plectinopathies: pathology and mechanisms	Acta Neuropathol	Plectin, a giant multifunctional cytolinker protein, plays a crucial role in stabilizing and orchestrating intermediate filament networks in cells. Mutations in the human plectin gene result in multiple diseases manifesting with muscular dystrophy, skin blistering, and signs of neuropathy. The most common disease caused by plectin deficiency is epidermolysis bullosa simplex (EBS)-MD, a rare autos…
26	22230109	2012	Chaouch, A., Beeson, D., Hantai, D. and Lochmuller, H.	186th ENMC international workshop: congenital myasthenic syndromes 24-26 June 2011, Naarden, The Netherlands	Neuromuscul Disord
27	23278578	2012	Engel, A. G., Shen, X. M., Selcen, D. and Sine, S.	New horizons for congenital myasthenic syndromes	Ann N Y Acad Sci	During the past five years an increasing number of patients have been diagnosed with congenital myasthenic syndromes (CMS) and a number of novel syndromes have been recognized and investigated. This presentation focuses on the CMS caused by defects in choline acetyltransferase, novel fast-channel syndromes that hinder isomerization of the acetylcholine receptor from the closed to the open state, …
28	23278577	2012	Palace, J.	DOK7 congenital myasthenic syndrome	Ann N Y Acad Sci	Despite being a fairly recent discovery, DOK7 congenital myasthenic syndrome (CMS) is the third most common form of CMS in the United Kingdom. DOK7 is a postsynaptic protein associated with the AChR clustering pathway. In contrast to AChR deficiency due to epsilon subunit mutations, onset of DOK7 CMS tends to be later--ages two to three years--and in DOK7 CMS eye movements are usually spared and …
29	22911480	2012	Schara, U., Della Marina, A. and Abicht, A.	Congenital myasthenic syndromes: current diagnostic and therapeutic approaches	Neuropediatrics	Congenital myasthenic syndromes (CMS) are rare genetically and clinically heterogeneous disorders characterized by an impaired neuromuscular transmission. Exact prevalence data are not available, approximately 2000 to 3000 patients worldwide have been diagnosed on a molecular level; mutations in 14 different genes are known to date leading to causal defects in presynaptic nerve terminal, synaptic…
30	22104196	2012	Engel, A. G.	Current status of the congenital myasthenic syndromes	Neuromuscul Disord	Congenital myasthenic syndromes (CMS) are heterogeneous disorders in which the safety margin of neuromuscular transmission is compromised by one or more specific mechanisms. Clinical, electrophysiologic, and morphologic studies have paved the way for detecting CMS-related mutations in proteins residing in the nerve terminal, the synaptic basal lamina, and in the postsynaptic region of the motor e…
31	21997714	2012	Engel, A. G.	Congenital myasthenic syndromes in 2012	Curr Neurol Neurosci Rep	Congenital myasthenic syndromes (CMS) represent a heterogeneous group of disorders in which the safety margin of neuromuscular transmission is compromised by one or more specific mechanisms. Clinical, electrophysiologic, and morphologic studies have paved the way for detecting CMS-related mutations in proteins residing in the nerve terminal, the synaptic basal lamina, or in the postsynaptic regio…
32	22353287	2012	Lorenzoni, P. J., Scola, R. H., Kay, C. S. and Werneck, L. C.	Congenital myasthenic syndrome: a brief review	Pediatr Neurol	Congenital myasthenic syndromes comprise heterogeneous genetic diseases characterized by compromised neuromuscular transmission. Congenital myasthenic syndromes are classified as presynaptic, synaptic, or postsynaptic, depending on the primary defect's location within the neuromuscular junction. Presynaptic forms are the rarest, affecting an estimated 7-8% of patients; synaptic forms account for …
33	21498094	2011	Barisic, N., Chaouch, A., Muller, J. S. and Lochmuller, H.	Genetic heterogeneity and pathophysiological mechanisms in congenital myasthenic syndromes	Eur J Paediatr Neurol	Congenital myasthenic syndromes (CMS) are a rare heterogeneous group of inherited neuromuscular disorders associated with distinctive clinical, electrophysiological, ultrastructural and genetic abnormalities. These genetic defects either impair neuromuscular transmission directly or result in secondary impairments, which eventually compromise the safety margin of neuromuscular transmission. In th…
34	20852879	2010	Sarkozy, A. and Lochmuller, H.	Neuromuscular disorders and 2010: recent advances	J Neurol	This short review summarises the research articles related to neuromuscular disorders published in the Journal of Neurology over the last year from May 2009 to July 2010.
35	20547629	2010	Spillane, J., Beeson, D. J. and Kullmann, D. M.	Myasthenia and related disorders of the neuromuscular junction	J Neurol Neurosurg Psychiatry	Our understanding of transmission at the neuromuscular junction has increased greatly in recent years. We now recognise a wide variety of autoimmune and genetic diseases that affect this specialised synapse, causing muscle weakness and fatigue. These disorders greatly affect quality of life and rarely can be fatal. Myasthenia gravis is the most common disorder and is most commonly caused by autoa…
36	19017561	2009	Nogajski, J. H., Kiernan, M. C., Ouvrier, R. A. and Andrews, P. I.	Congenital myasthenic syndromes	J Clin Neurosci	Congenital myasthenic syndromes (CMS) are a heterogeneous group of uncommon, inherited disorders affecting the neuromuscular junction. The defects interfere with presynaptic, synaptic, or postsynaptic function and compromise neuromuscular transmission. Most patients with CMS have similar clinical features regardless of the underlying defect, but attention to clinical and electrodiagnostic paramet…
37	18031562	2008	Finsterer, J.	Primary periodic paralyses	Acta Neurol Scand	OBJECTIVE: To review the current knowledge about primary periodic paralyses (PPs). RESULTS: Periodic paralyses are a heterogeneous group of disorders, clinically characterized by episodes of flaccid muscle weakness, occurring at irregular intervals. PPs are divided into primary (hereditary) and secondary (acquired) forms of which the secondary PPs are much more common than the primary PPs. Primar…
38	18707767	2008	Kinali, M., Beeson, D., Pitt, M. C., Jungbluth, H., Simonds, A. K., Aloysius, A., Cockerill, H., Davis, T., Palace, J., Manzur, A. Y., Jimenez-Mallebrera, C., Sewry, C., Muntoni, F. and Robb, S. A.	Congenital myasthenic syndromes in childhood: diagnostic and management challenges	J Neuroimmunol	The Congenital Myasthenic Syndromes (CMS), a group of heterogeneous genetic disorders of neuromuscular transmission, are often misdiagnosed as congenital muscular dystrophy (CMD) or myopathies and present particular management problems. We present our experience of 46 children with CMS, referred to us between 1992-2007 with provisional diagnoses of congenital myopathy (22/46), CMS or limb-girdle …
39	19019305	2008	Schara, U. and Lochmuller, H.	Therapeutic strategies in congenital myasthenic syndromes	Neurotherapeutics	Congenital myasthenic syndromes (CMS) are classified in terms of the located defect: presynaptic, postsynaptic, and synaptic. They are inherited disorders caused by various genetic defects, all but the slow-channel CMS by recessive inheritance. To date, 10 different CMS are known and further CMS subtypes and their genetic cause may be disclosed by future investigations. Prognosis in CMS is variab…
40	18631848	2008	Engel, A. G.	Congenital myasthenic syndromes	Handb Clin Neurol
41	18567859	2008	Engel, A. G., Shen, X. M., Selcen, D. and Sine, S. M.	Further observations in congenital myasthenic syndromes	Ann N Y Acad Sci	During the past five years many patients suffering from congenital myasthenic syndromes (CMS) have been identified worldwide and novel causative genes and mutations have been discovered. The disease genes now include those encoding each subunit of the acetylcholine receptor (AChR), the ColQ part of acetylcholinesterase (AChE), choline acetyltransferase, Na(v)1.4, MuSK, and Dok-7. Moreover, emergi…
42	17395135	2007	Engel, A. G.	The therapy of congenital myasthenic syndromes	Neurotherapeutics	Congenital myasthenic syndromes (CMSs) are heterogeneous disorders in which the safety margin of neuromuscular transmission is compromised by one or more mechanisms. Specific diagnosis of a CMS is important as some medications that benefit one type of CMS can be detrimental in another type. In some CMSs, strong clinical clues point to a specific diagnosis. In other CMSs, morphologic and in vitro …
43	17635211	2007	Parr, J. R. and Jayawant, S.	Childhood myasthenia: clinical subtypes and practical management	Dev Med Child Neurol	In recent years, understanding of the pathogenesis and clinical presentation of distinct myasthenia subtypes has increased significantly. This article reviews the clinical manifestations of autoimmune myasthenia gravis (including myasthenia associated with anti-muscle-specific kinase antibodies), ocular myasthenia, and antibody negative myasthenia. The following treatments are examined: cholinest…
44	15951177	2005	Beeson, D., Hantai, D., Lochmuller, H. and Engel, A. G.	126th International Workshop: congenital myasthenic syndromes, 24-26 September 2004, Naarden, the Netherlands	Neuromuscul Disord
45	15367858	2004	Hantai, D., Richard, P., Koenig, J. and Eymard, B.	Congenital myasthenic syndromes	Curr Opin Neurol	PURPOSE OF REVIEW: Congenital myasthenic syndromes are a heterogeneous group of diseases caused by genetic defects affecting neuromuscular transmission. In this article, a strategy that leads to the diagnosis of congenital myasthenic syndromes is presented, and recent advances in the clinical, genetic and molecular aspects of congenital myasthenic syndrome are outlined. RECENT FINDINGS: Besides t…
46	15229798	2004	Harper, C. M.	Congenital myasthenic syndromes	Semin Neurol	Congenital myasthenic syndromes are genetic disorders of neuromuscular transmission that should be considered in the differential diagnosis of seronegative myasthenia gravis and other neuromuscular disorders. They are present at birth but may not manifest until childhood or adult life. A classification system of congenital myasthenic syndromes based on molecular genetics is under evolution. Clini…
47	12508290	2003	Engel, A. G., Ohno, K. and Sine, S. M.	Congenital myasthenic syndromes: progress over the past decade	Muscle Nerve	Congenital myasthenic syndromes (CMS) stem from defects in presynaptic, synaptic basal lamina, and postsynaptic proteins. The presynaptic CMS are associated with defects that curtail the evoked release of acetylcholine (ACh) quanta or ACh resynthesis. Defects in ACh resynthesis have now been traced to mutations in choline acetyltransferase. A basal lamina CMS is caused by mutations in the collage…
48	11297949	2001	Engel, A. E.	73(rd) ENMC International Workshop: congenital myasthenic syndromes. 22-23 October, 1999, Naarden, The Netherlands	Neuromuscul Disord
49	20301347	1993	Abicht, A., Muller, J. S. and Lochmuller, H.	Congenital Myasthenic Syndromes	Book Section	CLINICAL CHARACTERISTICS: Congenital myasthenic syndromes (designated as CMS throughout this entry) are characterized by fatigable weakness of skeletal muscle (e.g., ocular, bulbar, limb muscles) with onset at or shortly after birth or in early childhood; rarely, symptoms may not manifest until later in childhood. Cardiac and smooth muscle are usually not involved. Severity and course of disease …
50
51	8400858	1993	Shillito, P., Vincent, A. and Newsom-Davis, J.	Congenital myasthenic syndromes	Neuromuscul Disord	The Congenital Myasthenic Syndromes (CMS) constitute a group of rare genetic disorders affecting neuromuscular transmission. They differ from myasthenia gravis and the Lambert-Eaton myasthenic syndrome, which are autoimmune antibody-mediated conditions. CMS can present at any time from birth to adulthood, though usually within the first 2 yr of life, and result in a spectrum of diseases ranging f…
52	1325985	1992	Kaminski, H. J. and Ruff, R. L.	Congenital disorders of neuromuscular transmission	Hosp Pract (Off Ed)	Pathology underlying congenital forms of myasthenia gravis has been delineated through microscopic and electrophysiologic studies over the past 15 years. Differentiation from the immune-mediated disorder is crucial because therapy appropriate for acquired myasthenia may be harmful to patients with congenital disease.
53	2267290	1990	Engel, A. G., Walls, T. J., Nagel, A. and Uchitel, O.	Newly recognized congenital myasthenic syndromes: I. Congenital paucity of synaptic vesicles and reduced quantal release. II. High-conductance fast-channel syndrome. III. Abnormal acetylcholine receptor (AChR) interaction with acetylcholine. IV. AChR deficiency and short channel-open time	Prog Brain Res
54	3191649	1988	Dooley, J. M., Writer, H., Gibson, E. J. and MacSween, J.	Congenital myasthenia gravis. The clinical spectrum. A practical approach to diagnosis and treatment	Clin Pediatr (Phila)
55	3058779	1988	Engel, A. G.	Congenital myasthenic syndromes	J Child Neurol	By the mid-1970s the autoimmune origin of myasthenia gravis had been well established. Once this feat had been accomplished, it also became apparent that myasthenic disorders occurring in a genetic or congenital setting had a different etiology. As a result, a number of distinct myasthenic syndromes have been recognized and investigated by electrophysiological and ultrastructural methods. The new…
56	3762582	1986	Cornblath, D. R.	Disorders of neuromuscular transmission in infants and children	Muscle Nerve	Disorders of neuromuscular transmission in infants and children can be divided into two groups. The first group includes conditions similar to those seen in adults: autoimmune myasthenia gravis, Lambert-Eaton myasthenic syndrome, and botulism. The second includes several disorders that are unique to this age group, such as the congenital myasthenias and infantile botulism. This review discusses t…
57	6280566	1981	Engel, A. G., Lambert, E. H., Mulder, D. M., Gomez, M. R., Whitaker, J. N., Hart, Z. and Sahashi, K.	Recently recognized congenital myasthenic syndromes: (a) end-plate acetylcholine (ACh) esterase deficiency (b) putative abnormality of the ACh induced ion channel (c) putative defect of ACh resynthesis or mobilization - clinical features, ultrastructure and cytochemistry	Ann N Y Acad Sci
