# Supplementary material for: Targeted therapies for congenital myasthenic syndromes: systematic review and steps towards a treatabolome
Source: Emerg Top Life Sci. 2019 Jan 28;3(1):19–37. doi: 10.1042/ETLS20180100 (PMC6436731; doi:10.1042/ETLS20180100)
Supplement: Supplementary File S2 [file ETLS-3-19-s2.pdf]

## Sheet: Treatment evidence by CMS type
Gene involved	AGRN	ALG14	ALG2	CHAT	CHRNA1	CHRNA1	CHRNA1	CHRNB1	CHRNB1	CHRNB1	CHRND	CHRND	CHRND	CHRND	CHRNE	CHRNE	CHRNE	CHRNE	COL13A1	COLQ	DOK7	DPAGT1	GFPT1	GMPPB	LAMB2	LRP4	MUSK	MYO9A	PLEC1	PREPL	RAPSN	SCN4A	SLC18A3	SLC25A1	SLC5A7	SNAP25B	SYT2	UNC13A	VAMP1
Descriptive name	Congenital myasthenic syndrome due to agrin deficiency caused by pathogenic variants in AGRN	Congenital myasthenic syndrome due to a defect of glycosylation caused by pathogenic variants in ALG14	Congenital myasthenic syndrome due to a defect of glycosylation caused by pathogenic variants in ALG2	Congenital myasthenic syndrome due to endplate choline acetyltransferase deficiency caused by pathogenic variants in CHAT	Slow-channel congenital myasthenic syndrome due to an acetylcholine receptor defect caused by a pathogenic variant in CHRNA1	Fast-channel congenital myasthenic syndrome due to an acetylcholine receptor defect caused by pathogenic variants in CHRNA1	Congenital myasthenic syndrome due to primary acetylcholine receptor deficiency caused by pathogenic variants in CHRNA1	Slow-channel congenital myasthenic syndrome due to an acetylcholine receptor defect caused by a pathogenic variant in CHRNB1	Fast-channel congenital myasthenic syndrome due to an acetylcholine receptor defect caused by pathogenic variants in CHRNB1	Congenital myasthenic syndrome due to primary acetylcholine receptor deficiency caused by pathogenic variants in CHRNB1	Slow-channel congenital myasthenic syndrome due to an acetylcholine receptor defect caused by a pathogenic variant in CHRND	Fast-channel congenital myasthenic syndrome due to an acetylcholine receptor defect caused by pathogenic variants in CHRND	Congenital myasthenic syndrome due to primary acetylcholine receptor deficiency caused by pathogenic variants in CHRND	Congenital myasthenic syndrome due to defects in acetylcholine receptor clustering caused by pathogenic variants in CHRND	Slow-channel congenital myasthenic syndrome due to an acetylcholine receptor defect caused by a pathogenic variant in CHRNE	Fast-channel congenital myasthenic syndrome due to an acetylcholine receptor defect caused by pathogenic variants in CHRNE	Congenital myasthenic syndrome due to primary acetylcholine receptor deficiency caused by pathogenic variants in CHRNE	Congenital myasthenic syndrome with kinetic defect due to reduced ion channel conductance caused by pathogenic variants in CHRNE	Congenital myasthenic syndrome due to collagen 13 defects caused by pathogenic variants in COL13A1	Congenital myasthenic syndrome due to endplate acetylcholinesterase deficiency caused by pathogenic variants in COLQ	Congenital myasthenic syndrome due to defects in docking protein 7 caused by pathogenic variants in DOK7	Congenital myasthenic syndrome due to a defect of glycosylation caused by pathogenic variants in DPAGT1	Congenital myasthenic syndrome due to a defect of glycosylation caused by pathogenic variants in GFPT1	Congenital myasthenic syndrome due to a defect of glycosylation caused by pathogenic variants in GMPPB	Congenital myasthenic syndrome due to laminin beta 2 deficiency caused by pathogenic variants in LAMB2	Congenital myasthenic syndrome due to defects in low-density lipoprotein receptor-related protein 4 caused by pathogenic variants in LRP4	Congenital myasthenic syndrome due to defects in MuSK caused by pathogenic variants in MUSK	Congenital myasthenic syndrome due to a defect in Myosin 9A caused by pathogenic variants in MYO9A	Congenital myasthenic syndrome due to plectin deficiency caused by pathogenic variants in PLEC1	Congenital myasthenic syndrome due to pathogenic variants in PREPL that predict reduced filling of synaptic vesicles with ACh	Congenital myasthenic syndrome due to endplate rapsyn deficiency caused by pathogenic variants in RAPSN	Congenital myasthenic syndrome due to a sodium channel 1.4 defect caused by pathogenic variants in SCN4A	Congenital myasthenic syndrome due to a vesicular acetylcholine transporter defect caused by pathogenic variants in SLC18A3	Congenital myasthenic syndrome due to a mitochondrial citrate carrier defect caused by pathogenic variants in SLC25A1	Congenital myasthenic syndrome due to a choline transporter defect caused by pathogenic variants in SLC5A7	Congenital myasthenic syndrome due to a synaptosomal-associated protein 25 defect caused by pathogenic variants in SNAP25B	Congenital myasthenic syndrome due to a synaptotagmin defect caused by a pathogenic variant in SYT2	Congenital myasthenic syndrome due to a mammalian uncoordinated-13 protein defect caused by a pathogenic variant in UNC13A	Congenital myasthenic syndrome due to a vesicle associated membrane protein 1 defect caused by a pathogenic variant in VAMP1
First-line treatment recommendation	Salbutamol or ephedrine	Pyridostigmine	Pyridostigmine	Pyridostigmine	Fluoxetine or quinidine	Pyridostigmine	Pyridostigmine	Fluoxetine or quinidine	Pyridostigmine	Pyridostigmine	Fluoxetine or quinidine	Pyridostigmine	Pyridostigmine	Pyridostigmine	Fluoxetine or quinidine	Pyridostigmine	Pyridostigmine	Pyridostigmine	3,4-diaminopyridine	Salbutamol or ephedrine	Salbutamol or ephedrine	Pyridostigmine	Pyridostigmine	Pyridostigmine	Salbutamol or ephedrine	Salbutamol or ephedrine	Salbutamol or ephedrine	Pyridostigmine	Pyridostigmine	Pyridostigmine	Pyridostigmine	Pyridostigmine	Pyridostigmine	Pyridostigmine	Pyridostigmine	3,4-diaminopyridine	3,4-diaminopyridine	3,4-diaminopyridine	Pyridostigmine
Supplemental treatment recommendation 1		3,4-diaminopyridine	3,4-diaminopyridine	3,4-diaminopyridine		Salbutamol or ephedrine	3,4-diaminopyridine		Salbutamol or ephedrine	3,4-diaminopyridine		Salbutamol or ephedrine	3,4-diaminopyridine			Salbutamol or ephedrine	3,4-diaminopyridine		Salbutamol or ephedrine			3,4-diaminopyridine	3,4-diaminopyridine	3,4-diaminopyridine							3,4-diaminopyridine	Acetazolamide		3,4-diaminopyridine	Salbutamol or ephedrine			Pyridostigmine
Supplemental treatment recommendation 2				Salbutamol or ephedrine		3,4-diaminopyridine	Salbutamol or ephedrine		3,4-diaminopyridine	Salbutamol or ephedrine		3,4-diaminopyridine	Salbutamol or ephedrine			3,4-diaminopyridine	Salbutamol or ephedrine					Salbutamol or ephedrine	Salbutamol or ephedrine	Salbutamol or ephedrine							Salbutamol or ephedrine
Likely ineffective																			Pyridostigmine
Avoid treatment (may worsen)	Pyridostigmine				Pyridostigmine	Fluoxetine or quinidine		Pyridostigmine	Fluoxetine or quinidine		Pyridostigmine	Fluoxetine or quinidine			Pyridostigmine	Fluoxetine or quinidine				Pyridostigmine	Pyridostigmine					Pyridostigmine	Pyridostigmine				Fluoxetine or quinidine
Expert summary of the evidence	Small number of reported cases; exploratory treatment with β2 adrenergic receptor agonists	Small number of reported cases; exploratory treatment with acetylcholinesterase inhibitor	Small number of reported cases; exploratory treatment with acetylcholinesterase inhibitor	Acetylcholinesterase inhibitors recommended including in oligosymptomatic patients to reduce EA	Channel blocker recommended; avoid acetylcholinesterase inhibitors	Acetylcholinesterase inhibitors recommended; may require add-on second-line therapy	Small number of reported cases; exploratory treatment with acetylcholinesterase inhibitor	Channel blocker recommended; avoid acetylcholinesterase inhibitors	Acetylcholinesterase inhibitors recommended; may require add-on second-line therapy	Small number of reported cases; exploratory treatment with acetylcholinesterase inhibitor	Channel blocker recommended; avoid acetylcholinesterase inhibitors	Acetylcholinesterase inhibitors recommended; may require add-on second-line therapy	Small number of reported cases; exploratory treatment with acetylcholinesterase inhibitor	Small number of reported cases; exploratory treatment with acetylcholinesterase inhibitor	Channel blocker recommended; avoid acetylcholinesterase inhibitors	Acetylcholinesterase inhibitors recommended; may require add-on second-line therapy	Acetylcholinesterase inhibitors recommended; may require add-on second-line therapy	Small number of reported cases; exploratory treatment with acetylcholinesterase inhibitor	Small number of reported cases; exploratory treatment with β2 adrenergic receptor agonists and 3,4-DAP	β2 adrenergic receptor agonists recommended; avoid acetylcholinesterase inhibitors	β2 adrenergic receptor agonists recommended; avoid acetylcholinesterase inhibitors	Acetylcholinesterase inhibitors recommended. May see additional benefit with addition of 3,4-DAP and salbutamol	Acetylcholinesterase inhibitors recommended. May see additional benefit with addition of 3,4-DAP and salbutamol; no effect on dystrophy expected	Acetylcholinesterase inhibitors recommended. May see additional benefit with addition of 3,4-DAP and salbutamol; no effect on dystrophy expected	Small number of reported cases; exploratory treatment with β2 adrenergic receptor agonists	Small number of reported cases; exploratory treatment with β2 adrenergic receptor agonists	Small number of reported cases; exploratory treatment with β2 adrenergic receptor agonists	Small number of reported cases; exploratory treatment with acetylcholinesterase inhibitors	Small number of reported cases	Small number of reported cases; acetylcholinesterase inhibitors possibly beneficial in infancy	Acetylcholinesterase inhibitors recommended. May see additional benefit with addition of 3,4-DAP and salbutamol	Small number of reported cases; exploratory treatment with acetylcholinesterase inhibitors. Acetazolamide may be helpful for periodic paralysis.	Acetylcholinesterase inhibitors may be useful for respiratory crisis	Small number of reported cases; exploratory treatment with acetylcholinesterase inhibitors	Acetylcholinesterase inhibitors recommended	Small number of reported cases; exploratory treatment with 3,4-diaminopyridine	Small number of reported cases; exploratory treatment with 3,4-diaminopyridine	Small number of reported cases; exploratory treatment with 3,4-diaminopyridine	Small number of reported cases; exploratory treatment with acetylcholinesterase inhibitors
Key reference	24951643	23404334	23404334	19900826	9546329	21940170	29478601	9546329	25264167	29395675	9546329	21940170	29478601	16916845	9546329	21940170	26296515	22382357	26626625	22088788	24425145	22742743	28712002	26133662	19251977	26052878	29704306	27259756	21263134	24610330	19620612	12766226	29874875	26870663	29874875	25381298	26519543	27648472	28253535
GRADE rating*	very low	very low	very low	low	low	low	very low	low	low	very low	low	low	very low	very low	low	moderate	moderate	very low	very low	moderate	moderate	low	low	low	very low	very low	low	very low	very low	very low	moderate	very low	very low	very low	very low	very low	very low	very low	very low
Number of publications	7	2	1	18	8	4	3	5	1	1	2	4	2	1	11	6	40	1	2	35	40	7	10	6	1	2	11	2	2	2	40	3	2	1	4	1	1	1	1
PMIDs	28221305 29258548 28937031 28464723 24951643 22205389 19631309	28733338 23404334	23404334	29783273 29395675 29189923 29130637 29054425 28464723 26789281 26080897 23292760 21786365 19900826 19520274 18797171 19289695 15701560 12548525 12609506 12117478	29395675 29054425 23688972 21822932 21316238 20562457 9546329 9158151	26910802 22728938 12588888 10195214	30177536 27748205 20157724	29054425 21822932 20562457 9546329 8651643	25264167	29395675	21822932 11782989	29390429 21940170 12499478 11435464	28464723 25264167	16916845	29395675 29054425 27779167 25264167 23281026 21822932 19289485 16621558 12771277 12141316 9546329	29395675 29367459 24295813 21940170 22592360 8755487	29395675 29383513 29189923 30124556 29702980 28690392 29054425 28464723 27717316 27634344 27348204 25264167 26296515 22408661 21721016 21150643 20157724 20562457 19544078 19064877 16061559 15615813 15965226 15145336 11960891 12536367 12417530 12453093 11030414 10976646 10534268 10514102 10211467 10382905 9668239 9668237 9708546 9668238 9158150 8957026	22382357	29363764 26626625	29395675 30124556 28744372 29054425 28221310 28464723 25695962 25557462 23371844 22759693 22490774 22088788 21952943 20562457 20370815 19623452 18180250 16009904 15248101 12609505 11932977 11865139 10441569	29395675 29395672 28508085 29118959 29093122 28716243 28289174 26552645 25849006 26583494 25625551 25033858 23219351 23831158 23790237 23657916 22884442 21952943 20012313 20458068 20562457 20610155 19608775 19837590 18161030 18626973 17439981 17452375	29356258 29311015 25500013 24759841 23591138 23447650 22742743	29395675 30124556 28712002 29054425 28464723 23488891 23794683 23569079 21975507 22987706	30257713 28433477 27874200 29054425 27147698 26133662	19251977	26052878 24234652	29704306 28464723 27588369 25695962 25900532 24183479 23326516 24122059 20371544 19949040 15496425	28464723 27259756	21263134 20624679	29913539 24610330	30266223 30028532 29189923 30124556 29054425 27397848 27139332 26910802 26782015 25194721 23365176 22326364 21372719 22408661 20157724 19620612 16945936 16931511 15036330 15145336 15328566 15482960 14504330 12929188 12796535 12651869 12807980 11791205	26659129 25707578 12766226	29130637 27590285	26870663	29189923 30172469 29088354 27569547	25381298	26519543	27648472	28253535
*
GRADE Working Group grades of evidence
High quality: Further research is very unlikely to change our conf idence in the estimate of ef fect.
Moderate quality: Further research is likely to have an important impact on our conf idence in the estimate of ef fect and may change the estimate.
Low quality: Further research is very likely to have an important impact on our conf idence in the estimate of ef fect and is likely to change the estimate.
Very low quality: We are very uncertain about the estimate.
